# Supplementary material for: Construction of 1,2-dihydro-1,3,5-triazines via reactions involving amidines
Source: Royal Society of Chemistry journal article supplement (doi:10.1039/d3ob00283g), 2023-01-01
Supplement: d3ob00283g1.pdf [file d3ob00283g1.pdf]

## Supporting Information

### Construction of 1,2-Dihydro-1,3,5-triazines *via* the Reaction Involving Amidines

Honghong Guo, Jianying Lin, Qiang Liu and Xing Li\*

Department of Biomedical Engineering, Taiyuan University of Technology, 79 West Yingze Street, Taiyuan 030024, People's Republic of China. E-mail: [lixing@tyut.edu.cn](mailto:lixing@tyut.edu.cn)

|                                                                                         |     |
|-----------------------------------------------------------------------------------------|-----|
| 1. General .....                                                                        | S1  |
| 2. Optimization of reaction conditions .....                                            | S1  |
| 2.1. Optimization for the reaction of amidines with aldehydes .....                     | S1  |
| 2.2. Optimization for the reaction of amidines with nitrones .....                      | S2  |
| 3 Three procedures for the preparation of 1,2-dihydro-1,3,5-triazine compounds .....    | S4  |
| 4. Characterization data for products <b>3</b> .....                                    | S6  |
| 5. Characterization data for products <b>5</b> and <b>7</b> .....                       | S12 |
| 6. Reference .....                                                                      | S26 |
| 7. Crystal structure of compound <b>3ia</b> (CCDC 2224587) .....                        | S27 |
| 8. Crystal structure of compound <b>7oa</b> (CCDC 2224582) .....                        | S28 |
| 9. <sup>1</sup> H NMR and <sup>13</sup> C NMR for products <b>3</b> .....               | S30 |
| 10. <sup>1</sup> H NMR and <sup>13</sup> C NMR for products <b>5</b> and <b>7</b> ..... | S49 |

## 1. General

Unless otherwise noted, all reagents and solvents obtained from commercial sources were used without further purification. Deuterated solvents were purchased from Sigma-Aldrich. Column chromatography was performed on silica gel (200–300 mesh) using petroleum ether/ethyl acetate. The known compounds were partly characterized by  $^1\text{H}$  NMR, and compared to authentic samples or the literature data.  $^1\text{H}$  NMR spectra were taken on a Bruker AVANCE III 400 MHz NMR spectrometer. The chemical shifts are reported in ppm downfield to the  $\text{CDCl}_3$  resonance ( $\delta = 7.27$ ). Spectra are reported as follows: chemical shift ( $\delta$  ppm), multiplicity (s = singlet, d = doublet, t = triplet, q = quartet, m = multiplet), coupling constants (Hz), integration, and assignment.  $^{13}\text{C}\{^1\text{H}\}$  NMR data were collected at 100 MHz with complete proton decoupling. The chemical shifts are reported in ppm downfield to the central  $\text{CDCl}_3$  resonance ( $\delta = 77.0$ ). High-resolution mass spectra (HRMS) were performed on a micrOTOF-Q II instrument with an ESI source. Melting points were measured with a RD-II melting point apparatus and are uncorrected.

## 2. Optimization of reaction conditions

### 2.1. Optimization for the reaction of amidines with aldehydes

Initially, we used the reaction of *N*-phenylbenzylamidine **1a** and benzaldehyde **4a** as the model reaction to screen the optimal reaction conditions and the experimental results are shown in Table 1. The investigation of catalysts showed that catalysts had a great influence on the yield (Table S1, entries 1–10). Most catalysts had low catalytic activity for the reaction and the yields were less than 40% (Table S1, entries 1–8).  $\text{Cu}(\text{OAc})_2$ ,  $\text{CuSO}_4$  and  $\text{Cu}(\text{OTf})_2$  as catalysts showed higher catalytic activity than  $\text{Pd}(\text{OAc})_2$  and  $\text{AlCl}_3$ . Furthermore, other catalysts containing Cu(I) such as  $(\text{CuOTf})_2\cdot\text{Ph}$ ,  $\text{CuBr}$  and  $\text{CuCl}$  were screened. However, no higher yield was obtained. Subsequently, the use of  $\text{I}_2$  improved catalytic activity and 42% yield could be obtained (Table S1, entry 9). Based on these experimental results, the examination of  $\text{ZnI}_2$  increased the yield to 57% (Table S1, entry 10). Unfortunately, increasing or decreasing the amount of  $\text{ZnI}_2$  could not improve the yield (Table S1, entries 11 and 12 vs. 10). Subsequently, the effect of solvents was examined. It was found that the solvents had a great effect on the yield, too. For most solvents, the yield was less than 30% (Table S1, entries 13–18). 1,4-Dioxane,  $\text{CH}_3\text{CH}_2\text{OH}$  and  $\text{CH}_3\text{CN}$  as solvents led

to lower yields due to the occurrence of more side-reactions and more surplus starting materials (Table S1, entries 15, 18 and 19). Because of more side reactions and more by-products, Toluene and DCE gave lower yields (Table S1, entries 13 and 14). Only trace of product was observed when DMF and CH<sub>3</sub>NO<sub>2</sub> were adopted as solvents due to low activity (Table S1, entries 16 and 17). To our delight, 57% yield could be obtained (Table S1, entry 10). Therefore, EtOAc was selected as the best solvent. Through examination of the effect of solvent dosage (Table S1, entries 20–22), the yield was increased to 73% when 1.5 mL EtOAc was used (Table S1, entry 21). Finally, when the molar ratio of **1a**/**4a** was 2.1:1, the yield was increased to 76% (Table S1, entry 23).

**Table S1** Screening of reaction conditions<sup>a</sup>

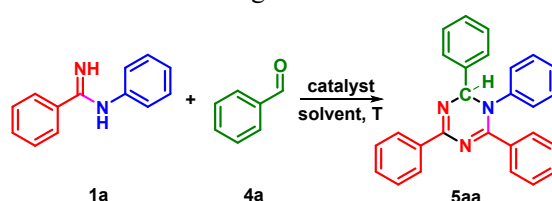

| Entry                 | Catalyst                 | Solvent                         | <b>1a:4a</b> | Yield <sup>b</sup> (%)    |
|-----------------------|--------------------------|---------------------------------|--------------|---------------------------|
| 1                     | Cu(OAc) <sub>2</sub>     | EtOAc                           | 2:1          | 34                        |
| 2                     | CuSO <sub>4</sub>        | EtOAc                           | 2:1          | 26                        |
| 3                     | Cu(OTf) <sub>2</sub>     | EtOAc                           | 2:1          | 24                        |
| 4                     | (CuOTf) <sub>2</sub> ·Ph | EtOAc                           | 2:1          | 23                        |
| 5                     | CuBr                     | EtOAc                           | 2:1          | 29                        |
| 6                     | CuCl                     | EtOAc                           | 2:1          | 24                        |
| 7                     | Pd(OAc) <sub>2</sub>     | EtOAc                           | 2:1          | 16                        |
| 8                     | AlCl <sub>3</sub>        | EtOAc                           | 2:1          | 10                        |
| 9                     | I <sub>2</sub>           | EtOAc                           | 2:1          | 42                        |
| 10                    | ZnI <sub>2</sub>         | EtOAc                           | 2:1          | 57                        |
| 11 <sup>c</sup>       | ZnI <sub>2</sub>         | EtOAc                           | 2:1          | 41                        |
| 12 <sup>d</sup>       | ZnI <sub>2</sub>         | EtOAc                           | 2:1          | 42                        |
| 13                    | ZnI <sub>2</sub>         | Toluene                         | 2:1          | 21                        |
| 14                    | ZnI <sub>2</sub>         | DCE                             | 2:1          | 26                        |
| 15                    | ZnI <sub>2</sub>         | 1,4-Dioxane                     | 2:1          | 16                        |
| 16                    | ZnI <sub>2</sub>         | DMF                             | 2:1          | trace <sup>e</sup>        |
| 17                    | ZnI <sub>2</sub>         | CH <sub>3</sub> NO <sub>2</sub> | 2:1          | trace                     |
| 18                    | ZnI <sub>2</sub>         | EtOH                            | 2:1          | 25                        |
| 19                    | ZnI <sub>2</sub>         | CH <sub>3</sub> CN              | 2:1          | 45                        |
| 20 <sup>f</sup>       | ZnI <sub>2</sub>         | EtOAc                           | 2:1          | 61                        |
| 21 <sup>g</sup>       | ZnI <sub>2</sub>         | EtOAc                           | 2:1          | 73                        |
| 22 <sup>h</sup>       | ZnI <sub>2</sub>         | EtOAc                           | 2:1          | 67                        |
| <b>23<sup>g</sup></b> | <b>ZnI<sub>2</sub></b>   | <b>EtOAc</b>                    | <b>2.1:1</b> | <b>76(11<sup>i</sup>)</b> |
| 24 <sup>g</sup>       | ZnI <sub>2</sub>         | EtOAc                           | 2.2:1        | 72                        |

<sup>a</sup> Unless otherwise noted, all reactions were carried out with benzaldehyde **4a** (0.2 mmol), *N*-



|                       |                                         |                         |              |                      |
|-----------------------|-----------------------------------------|-------------------------|--------------|----------------------|
| 5                     | Cu(OTf) <sub>2</sub>                    | DCE                     | 1:1          | 24                   |
| 6                     | CuCl                                    | DCE                     | 1:1          | 8                    |
| 7                     | (CuOTf) <sub>2</sub> ·Ph                | DCE                     | 1:1          | 13                   |
| 8                     | FeCl <sub>3</sub>                       | DCE                     | 1:1          | 10                   |
| 9                     | ZnCl <sub>2</sub>                       | DCE                     | 1:1          | N.D. <sup>c</sup>    |
| 10                    | CuCl <sub>2</sub> ·2H <sub>2</sub> O    | Bromobenzene            | 1:1          | 34                   |
| 11                    | CuCl <sub>2</sub> ·2H <sub>2</sub> O    | 1,4-Dioxane             | 1:1          | 29                   |
| 12                    | CuCl <sub>2</sub> ·2H <sub>2</sub> O    | Anisole                 | 1:1          | 29                   |
| 13                    | CuCl <sub>2</sub> ·2H <sub>2</sub> O    | DMF                     | 1:1          | N.D.                 |
| 14                    | CuCl <sub>2</sub> ·2H <sub>2</sub> O    | CH <sub>3</sub> CN      | 1:1          | trace <sup>d</sup>   |
| 15 <sup>e</sup>       | CuCl <sub>2</sub> ·2H <sub>2</sub> O    | CHCl <sub>3</sub>       | 1:1          | 53                   |
| 16 <sup>f</sup>       | CuCl <sub>2</sub> ·2H <sub>2</sub> O    | CHCl <sub>3</sub>       | 1:1          | 41(54 <sup>g</sup> ) |
| 17 <sup>g,h</sup>     | CuCl <sub>2</sub> ·2H <sub>2</sub> O    | CHCl <sub>3</sub>       | 1:1          | 51                   |
| 18 <sup>g,i</sup>     | CuCl <sub>2</sub> ·2H <sub>2</sub> O    | CHCl <sub>3</sub>       | 1:1          | 54                   |
| 19 <sup>g,j</sup>     | CuCl <sub>2</sub> ·2H <sub>2</sub> O    | CHCl <sub>3</sub>       | 1:1          | 39                   |
| 20 <sup>g,k</sup>     | CuCl <sub>2</sub> ·2H <sub>2</sub> O    | CHCl <sub>3</sub>       | 1:1          | 34                   |
| 21 <sup>g,l</sup>     | CuCl <sub>2</sub> ·2H <sub>2</sub> O    | CHCl <sub>3</sub>       | 1:1          | 43                   |
| 22 <sup>g</sup>       | CuCl <sub>2</sub> ·2H <sub>2</sub> O    | CHCl <sub>3</sub>       | 1.5:1        | 62                   |
| <b>23<sup>g</sup></b> | <b>CuCl<sub>2</sub>·2H<sub>2</sub>O</b> | <b>CHCl<sub>3</sub></b> | <b>1.8:1</b> | <b>75</b>            |
| 24 <sup>g</sup>       | CuCl <sub>2</sub> ·2H <sub>2</sub> O    | CHCl <sub>3</sub>       | 2:1          | 71                   |
| 25 <sup>g</sup>       | CuCl <sub>2</sub> ·2H <sub>2</sub> O    | CHCl <sub>3</sub>       | 1:1.5        | 60                   |

<sup>a</sup> Unless otherwise noted, all reactions were performed with *N*-phenylnitrone **6a** (0.1 mmol), *N*-phenylbenzamidine **1a** (0.1 mmol) and 10 mol% catalyst in a solvent (1.0 mL) at 60 °C for 12 h. <sup>b</sup> Isolated yield by silica gel chromatography. <sup>c</sup> N.D. = Not detected. <sup>d</sup> trace = Detected by TLC, not obtained by column chromatography. <sup>e</sup> The reaction was stirred at 60 °C. <sup>f</sup> The reaction was stirred at 50 °C for 12 h. <sup>g</sup> The reaction was stirred at 50 °C for 20 h. <sup>h</sup> 5 mol% CuCl<sub>2</sub>·2H<sub>2</sub>O was used. <sup>i</sup> 15 mol% CuCl<sub>2</sub>·2H<sub>2</sub>O was used. <sup>j</sup> 20 mol% CuCl<sub>2</sub>·2H<sub>2</sub>O was used. <sup>k</sup> 0.8 mL CHCl<sub>3</sub> was used. <sup>l</sup> 1.2 mL CHCl<sub>3</sub> was used.

### 3 Three procedures for the preparation of 1,2-dihydro-1,3,5-triazine compounds

#### 3.1 1,2-dihydro-1,3,5-triazine compounds were synthesized from the reaction of paraformaldehyde with amidines

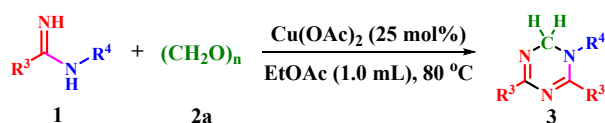

To an oven-dried glass tube were added paraformaldehyde **2a** (18 mg, 0.2 mmol), amidine **1** (0.44 mmol, 2.2 equiv), Cu(OAc)<sub>2</sub> (9.1 mg, 0.05 mmol, 25 mol%) and 1.0 mL ethyl acetate in turn. The reaction system was then stirred at 80 °C until the amount of amidine **1** was no longer consumed as monitored by TLC. Finally, the mixture was purified by silica gel column chromatography to afford the target product **3**.

### 3.2 1,2-dihydro-1,3,5-triazine compounds were synthesized from the reaction of aldehydes with amidines

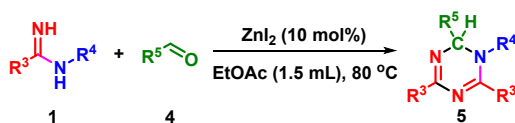

To an oven-dried glass tube were added aldehyde **4** (0.2 mmol), amidine **1** (0.42 mmol, 2.1 equiv), ZnI<sub>2</sub> (6.4 mg, 1.4 μL, 0.02 mmol, 10 mol%) and 1.5 mL ethyl acetate in turn. The reaction system was then stirred at 80 °C until aldehyde **4** was completely consumed as monitored by TLC. Finally, the mixture was purified by silica gel column chromatography to offer the target product **5**.

### 3.3 1,2-dihydro-1,3,5-triazine compounds were synthesized from the reaction of nitrones with amidines

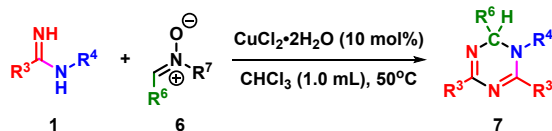

To an oven-dried glass tube were added *N*-arylnitrone **6** (0.1 mmol), amidine **1** (0.18 mmol, 1.8 equiv), CuCl<sub>2</sub>·2H<sub>2</sub>O (1.7 mg, 0.01 mmol, 10 mol%) and 1.0 mL chloroform in turn. The reaction system was then stirred at 50 °C until amidine **1** was completely consumed as monitored by TLC. Finally, the mixture was purified by silica gel column chromatography to provide the target product **7**.

#### 4. Characterization data for products 3

##### 1,4,6-triphenyl-1,2-dihydro-1,3,5-triazine (3aa)

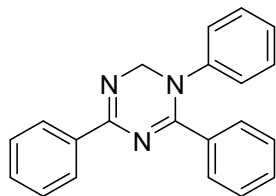

yellow solid (mp: 105–106 °C), (54.7 mg, 88%);  $^1\text{H NMR}$  ( $\text{CDCl}_3$ , 400 MHz)  $\delta$  8.39–8.38 (m, 2H), 7.64–7.62 (m, 2H), 7.43 (t,  $J = 3.2$  Hz, 3H), 7.31–7.27 (m, 1H), 7.22 (t,  $J = 6.8$  Hz, 2H), 7.12–7.07 (m, 2H), 7.02–7.00 (m, 1H), 6.87–6.86 (m, 2H), 5.44 (s, 2H) ppm;  $^{13}\text{C}\{^1\text{H}\}$  NMR ( $\text{CDCl}_3$ , 100 MHz)  $\delta$  162.4, 161.5, 143.3, 136.3, 134.1, 131.4, 130.7, 130.6, 129.1, 128.4, 128.3, 128.1, 125.7, 124.7, 66.9 ppm; HRMS (ESI)  $m/z$   $[\text{M} + \text{H}]^+$  calcd for  $\text{C}_{21}\text{H}_{18}\text{N}_3^+$  312.1495, found: 312.1495.

##### 4,6-diphenyl-1-(*o*-tolyl)-1,2-dihydro-1,3,5-triazine (3ba)

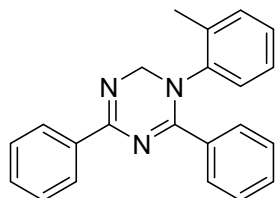

yellow solid (mp: 108–109 °C), (42.2 mg, 65%);  $^1\text{H NMR}$  ( $\text{CDCl}_3$ , 400 MHz)  $\delta$  8.37–8.35 (m, 2H), 7.65–7.63 (m, 2H), 7.47–7.44 (m, 3H), 7.36 (tt,  $J = 7.2, 1.2$  Hz, 1H), 7.26–7.22 (m, 2H), 7.09–7.06 (m, 4H), 5.36 (s, 2H), 2.16 (s, 3H) ppm;  $^{13}\text{C}\{^1\text{H}\}$  NMR ( $\text{CDCl}_3$ , 100 MHz)  $\delta$  163.3, 162.3, 142.5, 136.4, 134.4, 134.3, 131.4, 131.3, 130.5, 130.1, 128.2, 128.1, 128.0, 127.6, 127.4, 126.9, 67.4, 18.5 ppm; HRMS (ESI)  $m/z$   $[\text{M} + \text{H}]^+$  calcd for  $\text{C}_{22}\text{H}_{20}\text{N}_3^+$  326.1652, found: 326.1657.

##### 4,6-diphenyl-1-(*m*-tolyl)-1,2-dihydro-1,3,5-triazine (3ca)

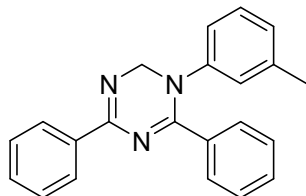

viscous liquid, (48.7 mg, 75%);  $^1\text{H NMR}$  ( $\text{CDCl}_3$ , 400 MHz)  $\delta$  8.36–8.34 (m, 2H), 7.67–7.65 (m, 2H), 7.46–7.44 (m, 3H), 7.38 (t,  $J = 7.6$  Hz, 1H), 7.29 (t,  $J = 8.0$  Hz, 2H), 7.06 (t,  $J = 7.6$  Hz, 1H), 6.91 (d,  $J = 7.6$  Hz, 1H), 6.79 (s, 1H), 6.72 (d,  $J = 15.6$  Hz, 1H), 5.47 (s, 2H), 2.22 (s, 3H) ppm;  $^{13}\text{C}\{^1\text{H}\}$  NMR ( $\text{CDCl}_3$ , 100 MHz)  $\delta$  162.4, 161.5, 143.2, 139.0, 136.2, 134.2, 131.2, 130.5, 129.3, 128.7, 128.3, 128.2, 127.9, 126.5, 125.2, 122.0, 66.9, 21.3 ppm; HRMS (ESI)  $m/z$   $[\text{M} + \text{H}]^+$  calcd for  $\text{C}_{22}\text{H}_{20}\text{N}_3^+$  326.1652, found: 326.1654.

##### 4,6-diphenyl-1-(*p*-tolyl)-1,2-dihydro-1,3,5-triazine (3da)

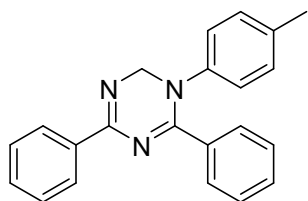

yellow solid (mp: 62–64 °C), (51.7 mg, 80%);  $^1\text{H NMR}$  ( $\text{CDCl}_3$ , 400 MHz)  $\delta$  8.36–8.33 (m, 2H), 7.66–7.63 (m, 2H), 7.46–7.44 (m, 3H), 7.37–7.34 (m, 1H), 7.29 (t,  $J = 8.0$  Hz, 2H), 6.99 (d,  $J = 8.0$  Hz, 2H), 6.84 (d,  $J = 8.4$  Hz, 2H), 5.47 (s, 2H), 2.25 (s, 3H) ppm;  $^{13}\text{C}\{^1\text{H}\}$  NMR ( $\text{CDCl}_3$ , 100 MHz)  $\delta$  162.3, 161.5, 140.7, 136.3, 135.6, 134.2, 131.2, 130.5, 130.4, 129.6, 128.3, 128.2, 127.9, 124.6, 67.0, 20.9 ppm; HRMS (ESI)  $m/z$   $[\text{M} + \text{H}]^+$  calcd for  $\text{C}_{22}\text{H}_{20}\text{N}_3^+$  326.1652, found: 326.1660.

### 1-(2-fluorophenyl)-4,6-diphenyl-1,2-dihydro-1,3,5-triazine (3ea)

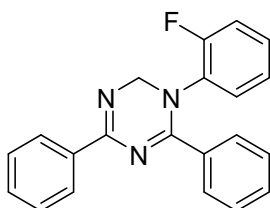

yellow solid (mp: 126–127 °C), (45.4 mg, 69%);  $^1\text{H NMR}$  ( $\text{CDCl}_3$ , 400 MHz)  $\delta$  8.36–8.33 (m, 2H), 7.67 (s, 1H), 7.65 (d,  $J = 1.6$  Hz, 1H), 7.46–7.45 (m, 3H), 7.40–7.35 (m, 1H), 7.30 (t,  $J = 8.0$  Hz, 2H), 7.15–7.09 (m, 1H), 7.04 (t,  $J = 8.8$  Hz, 1H), 6.94–6.93 (m, 2H), 5.42 (d,  $J = 0.8$  Hz, 2H) ppm;  $^{13}\text{C}\{^1\text{H}\}$  NMR ( $\text{CDCl}_3$ , 100 MHz)  $\delta$  163.0 (d,  $J = 132.3$  Hz), 158.3 (d,  $J = 247.4$  Hz), 136.2, 133.8, 131.5 (d,  $J = 150.8$  Hz), 131.4 (d,  $J = 11.8$  Hz), 130.0, 128.9, 128.3, 128.2, 128.1, 128.0, 127.9, 124.6 (d,  $J = 3.8$  Hz), 116.7 (d,  $J = 19.6$  Hz), 67.0, 69.9 ppm; HRMS (ESI)  $m/z$   $[\text{M} + \text{H}]^+$  calcd for  $\text{C}_{21}\text{H}_{17}\text{FN}_3^+$  330.1401, found: 330.1407.

### 1-(3-fluorophenyl)-4,6-diphenyl-1,2-dihydro-1,3,5-triazine (3fa)

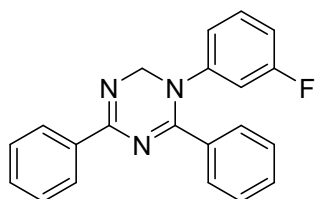

yellow solid (mp: 78–79 °C), (57.1 mg, 87%);  $^1\text{H NMR}$  ( $\text{CDCl}_3$ , 400 MHz)  $\delta$  8.35–8.33 (m, 2H), 7.67 (d,  $J = 7.2$  Hz, 2H), 7.46–7.45 (m, 2H), 7.40 (d,  $J = 7.2$  Hz, 1H), 7.32 (d,  $J = 7.6$  Hz, 2H), 7.15–7.09 (m, 1H), 6.81–6.77 (m, 1H), 6.69–6.65 (m, 2H), 5.45 (s, 2H) ppm;  $^{13}\text{C}\{^1\text{H}\}$  NMR ( $\text{CDCl}_3$ , 100 MHz)  $\delta$  163.9 (d,  $J = 246.4$  Hz), 162.2 (d,  $J = 83.7$  Hz), 144.9 (d,  $J = 9.6$  Hz), 135.9, 133.6, 131.6, 130.7, 130.4, 130.2, 130.1, 128.5, 128.2, 128.0, 120.3 (d,  $J = 2.9$  Hz), 112.7 (d,  $J = 20.9$  Hz), 111.8 (d,  $J = 23.8$  Hz), 66.7 ppm; HRMS (ESI)  $m/z$   $[\text{M} + \text{H}]^+$  calcd for  $\text{C}_{21}\text{H}_{17}\text{FN}_3^+$  330.1401, found: 330.1413.

### 1-(4-fluorophenyl)-4,6-diphenyl-1,2-dihydro-1,3,5-triazine (3ga)



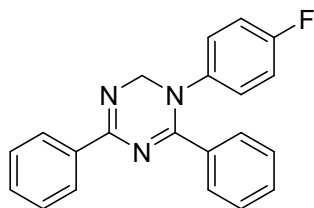

yellow solid (mp: 57–58 °C), (56.6 mg, 86%); **<sup>1</sup>H NMR** (CDCl<sub>3</sub>, 400 MHz) δ 8.36–8.33 (m, 2H), 7.64–7.62 (m, 2H), 7.48–7.43 (m, 3H), 7.40–7.36 (m, 1H), 7.31 (t, *J* = 8.0 Hz, 2H), 6.91–6.86 (m, 4H), 5.46 (s, 2H) ppm; **<sup>13</sup>C{<sup>1</sup>H} NMR** (CDCl<sub>3</sub>, 100 MHz) δ 162.3 (d, *J* = 85.4 Hz), 161.5 (d, *J* = 96.5 Hz), 139.5 (d, *J* = 3.0 Hz), 136.1, 133.8, 131.4, 130.6, 130.5, 128.4, 128.2, 127.9, 126.3 (d, *J* = 8.4 Hz), 116.1, 115.9, 67.1 ppm; **HRMS** (ESI) *m/z* [M + H]<sup>+</sup> calcd for C<sub>21</sub>H<sub>17</sub>FN<sub>3</sub><sup>+</sup> 330.1401, found: 330.1411.

### 1-(2,4-dimethylphenyl)-4,6-diphenyl-1,2-dihydro-1,3,5-triazine (3ha)

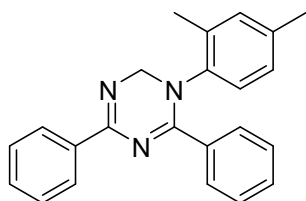

yellow solid (mp: 58–59 °C), (24.9 mg, 37%); **<sup>1</sup>H NMR** (CDCl<sub>3</sub>, 400 MHz) δ 8.36–8.34 (m, 2H), 7.66 (s, 1H), 7.64 (d, *J* = 1.6 Hz, 1H), 7.47–7.42 (m, 3H), 7.37–7.32 (m, 1H), 7.27–7.23 (m, 2H), 6.96 (t, *J* = 8.4 Hz, 1H), 6.89 (s, 2H), 5.34 (d, *J* = 2.4 Hz, 2H) 2.24 (s, 3H), 2.12 (s, 3H) ppm; **<sup>13</sup>C{<sup>1</sup>H} NMR** (CDCl<sub>3</sub>, 100 MHz) δ 163.3, 162.2, 139.9, 137.3, 136.5, 134.4, 134.1, 132.0, 131.2, 130.4, 130.1, 128.1, 128.0, 127.9, 127.6, 127.4, 67.6, 20.9, 18.3 ppm; **HRMS** (ESI) *m/z* [M + H]<sup>+</sup> calcd for C<sub>23</sub>H<sub>22</sub>N<sub>3</sub><sup>+</sup> 340.1808, found: 340.1805.

### 1-(3,5-dimethylphenyl)-4,6-diphenyl-1,2-dihydro-1,3,5-triazine (3ia)

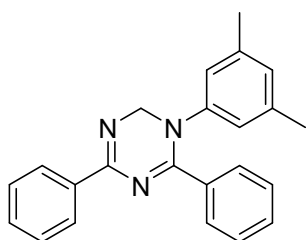

yellow solid (mp: 141–142 °C), (36.7 mg, 68%); **<sup>1</sup>H NMR** (CDCl<sub>3</sub>, 400 MHz) δ 8.35–8.34 (m, 2H), 7.68 (d, *J* = 8.0 Hz, 2H), 7.45–7.44 (m, 3H), 7.38–7.34 (m, 1H), 7.29 (t, *J* = 7.6 Hz, 2H), 6.72 (s, 1H), 6.56 (s, 2H), 5.45 (s, 2H), 2.16 (s, 6H) ppm; **<sup>13</sup>C{<sup>1</sup>H} NMR** (CDCl<sub>3</sub>, 100 MHz) δ 162.4, 161.5, 143.2, 138.7, 136.3, 134.3, 131.2, 130.5, 128.2, 128.1, 127.9, 127.5, 122.6, 67.2, 21.2 ppm; **HRMS** (ESI) *m/z* [M + H]<sup>+</sup> calcd for C<sub>23</sub>H<sub>22</sub>N<sub>3</sub><sup>+</sup> 340.1808, found: 340.1811.

### 1-(naphthalen-1-yl)-4,6-diphenyl-1,2-dihydro-1,3,5-triazine (3ja)

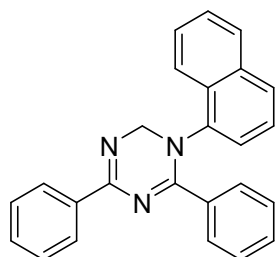

yellow solid (mp: 66–68 °C), (53.8 mg, 75%);  $^1\text{H NMR}$  ( $\text{CDCl}_3$ , 400 MHz)  $\delta$  8.42–8.40 (m, 2H), 8.02 (d,  $J = 8.4$  Hz, 1H), 7.85 (d,  $J = 8.0$  Hz, 1H), 7.69–7.65 (m, 3H), 7.62–7.58 (m, 1H), 7.54–7.52 (m, 1H), 7.49–7.47 (m, 3H), 7.26–7.19 (m, 2H), 7.13 (t,  $J = 7.6$  Hz, 2H), 7.07–7.05 (m, 1H), 5.61 (d,  $J = 11.6$  Hz, 1H), 5.47 (d,  $J = 11.6$  Hz, 1H) ppm;  $^{13}\text{C}\{^1\text{H}\}$  NMR ( $\text{CDCl}_3$ , 100 MHz)  $\delta$  164.1, 162.3, 140.1, 136.4, 134.5, 134.3, 131.4, 130.6, 130.1, 129.7, 128.8, 128.2, 128.1, 128.0, 127.9, 127.4, 126.7, 125.7, 125.3, 122.9, 67.9 ppm; HRMS (ESI)  $m/z$   $[\text{M} + \text{H}]^+$  calcd for  $\text{C}_{25}\text{H}_{20}\text{N}_3^+$  362.1652, found: 362.1663.

### 1-(naphthalen-2-yl)-4,6-diphenyl-1,2-dihydro-1,3,5-triazine (3ka)

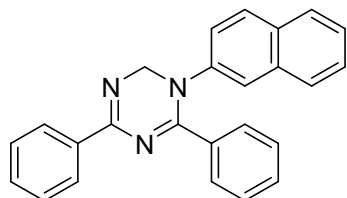

yellow solid (mp: 83–84 °C), (36.7 mg, 51%);  $^1\text{H NMR}$  ( $\text{CDCl}_3$ , 400 MHz)  $\delta$  8.39–8.37 (m, 2H), 7.72 (t,  $J = 6.8$  Hz, 4H), 7.58 (d,  $J = 8.8$  Hz, 1H), 7.47–7.46 (m, 3H), 7.43–7.38 (m, 3H), 7.35–7.31 (m, 1H), 7.25 (t,  $J = 7.6$  Hz, 2H), 6.99 (dd,  $J = 8.8$ , 2.0 Hz, 1H), 5.61 (s, 2H) ppm;  $^{13}\text{C}\{^1\text{H}\}$  NMR ( $\text{CDCl}_3$ , 100 MHz)  $\delta$  162.3, 161.4, 140.9, 136.2, 134.1, 133.4, 131.4, 131.1, 130.6, 130.5, 128.7, 128.4, 128.2, 128.0, 127.7, 127.5, 126.9, 126.0, 123.9, 121.5, 67.2 ppm; HRMS (ESI)  $m/z$   $[\text{M} + \text{H}]^+$  calcd for  $\text{C}_{25}\text{H}_{20}\text{N}_3^+$  362.1652, found: 362.1658.

### 1-phenyl-4,6-di-*o*-tolyl-1,2-dihydro-1,3,5-triazine (3ma)

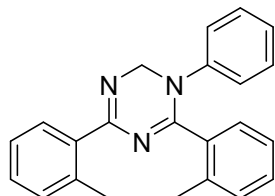

yellow solid (mp: 120–121 °C), (36.6 mg, 54%);  $^1\text{H NMR}$  ( $\text{CDCl}_3$ , 400 MHz)  $\delta$  7.80 (d,  $J = 6.8$  Hz, 1H), 7.46 (d,  $J = 7.6$  Hz, 1H), 7.29–7.22 (m, 4H), 7.19–7.10 (m, 3H), 7.07 (t,  $J = 7.6$  Hz, 1H), 7.01 (d,  $J = 7.6$  Hz, 1H), 6.93 (d,  $J = 7.6$  Hz, 2H), 5.52 (s, 2H), 2.61 (s, 3H), 2.24 (s, 3H) ppm;  $^{13}\text{C}\{^1\text{H}\}$  NMR ( $\text{CDCl}_3$ , 100 MHz)  $\delta$  164.1, 163.2, 141.9, 137.2, 136.8, 136.3, 134.4, 130.9, 130.6, 130.5, 130.2, 129.3, 129.0, 128.7, 125.9, 125.8, 125.6, 124.2, 65.8, 29.7, 21.3, 19.9 ppm; HRMS (ESI)  $m/z$   $[\text{M} + \text{H}]^+$  calcd for  $\text{C}_{23}\text{H}_{22}\text{N}_3^+$  340.1808, found: 340.1811.

### 1-phenyl-4,6-di-*m*-tolyl-1,2-dihydro-1,3,5-triazine (3na)

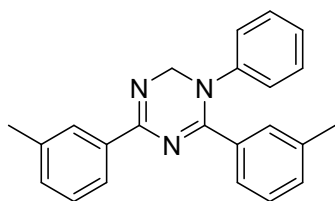

viscous liquid, (52.2.mg, 77%);  $^1\text{H NMR}$  ( $\text{CDCl}_3$ , 400 MHz)  $\delta$  8.17–8.15 (m, 2H), 7.56 (s, 1H), 7.37–7.32 (m, 2H), 7.29 (d,  $J = 7.2$  Hz, 2H), 7.20 (t,  $J = 8$  Hz, 3H), 7.12–7.05 (m, 2H), 5.48 (s, 2H), 2.43 (s, 3H), 2.29 (s, 3H) ppm;  $^{13}\text{C}\{^1\text{H}\}$  NMR ( $\text{CDCl}_3$ , 100 MHz)  $\delta$  162.6, 161.6, 143.4, 138.1, 137.8, 136.2, 134.0, 132.1, 131.3, 131.0, 129.0, 128.4, 128.1, 128.0, 127.8, 125.6, 125.2, 124.6, 66.8, 21.5, 21.4 ppm; HRMS (ESI)  $m/z$   $[\text{M} + \text{H}]^+$  calcd for  $\text{C}_{23}\text{H}_{22}\text{N}_3^+$  340.1808, found: 340.1810.

#### 1-phenyl-4,6-di-*p*-tolyl-1,2-dihydro-1,3,5-triazine (30a)

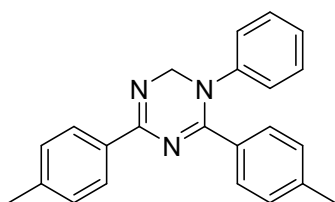

yellow solid (mp: 117–118 °C), (56.8 mg, 84%);  $^1\text{H NMR}$  ( $\text{CDCl}_3$ , 400 MHz)  $\delta$  8.25 (d,  $J = 8.4$  Hz, 2H), 7.56 (d,  $J = 8.4$  Hz, 2H), 7.26 (d,  $J = 8.0$  Hz, 2H), 7.20 (t,  $J = 7.6$  Hz, 2H), 7.09 (t,  $J = 7.2$  Hz, 3H), 6.94–6.92 (m, 2H), 5.45 (s, 2H), 2.40 (s, 3H), 2.31 (s, 3H), ppm;  $^{13}\text{C}\{^1\text{H}\}$  NMR ( $\text{CDCl}_3$ , 100 MHz)  $\delta$  162.2, 161.6, 143.5, 141.8, 140.6, 133.5, 131.1, 130.5, 129.5, 129.1, 129.0, 128.9, 127.9, 125.4, 124.6, 66.8, 21.5 ppm; HRMS (ESI)  $m/z$   $[\text{M} + \text{H}]^+$  calcd for  $\text{C}_{23}\text{H}_{22}\text{N}_3^+$  340.1808, found: 340.1817.

#### 4,6-bis(2-fluorophenyl)-1-phenyl-1,2-dihydro-1,3,5-triazine (3pa)

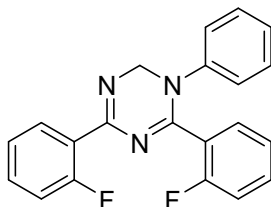

viscous liquid, (36.4 mg, 53%);  $^1\text{H NMR}$  ( $\text{CDCl}_3$ , 400 MHz)  $\delta$  8.06 (td,  $J = 7.6, 1.6$  Hz, 1H), 7.82 (td,  $J = 7.6, 2.0$  Hz, 1H), 7.42–7.32 (m, 2H), 7.21–7.17 (m, 4H), 7.14–7.09 (m, 2H), 6.99 (d,  $J = 8.0$  Hz, 2H), 6.83 (t,  $J = 9.2$  Hz, 1H), 5.53 (s, 2H) ppm;  $^{13}\text{C}\{^1\text{H}\}$  NMR ( $\text{CDCl}_3$ , 100 MHz)  $\delta$  162.6 (d,  $J = 165.3$  Hz), 160.3 (d,  $J = 4.3$  Hz), 160.0 (d,  $J = 164.3$  Hz), 159.2, 141.8, 133.2 (d,  $J = 8.5$  Hz), 132.2 (d,  $J = 2.1$  Hz), 131.6 (d,  $J = 7.5$  Hz), 128.7, 126.3, 125.1 (d,  $J = 9.6$  Hz), 124.6 (d,  $J = 3.6$  Hz), 124.4, 123.8 (d,  $J = 3.7$  Hz), 122.6 (d,  $J = 12.9$  Hz), 116.7 (d,  $J = 22.4$  Hz), 115.9 (d,  $J = 21.6$  Hz), 65.9, 29.7 ppm; HRMS (ESI)  $m/z$   $[\text{M} + \text{H}]^+$  calcd for  $\text{C}_{21}\text{H}_{16}\text{F}_2\text{N}_3^+$  348.1307, found: 348.1311.

#### 4,6-bis(3-fluorophenyl)-1-phenyl-1,2-dihydro-1,3,5-triazine (3qa)

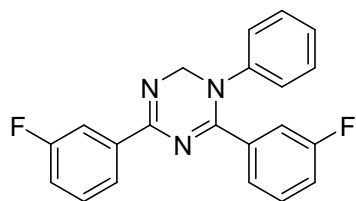

viscous liquid, (37.9 mg, 55%);  $^1\text{H NMR}$  ( $\text{CDCl}_3$ , 400 MHz)  $\delta$  8.10 (d,  $J = 7.6$  Hz, 1H), 8.02 (d,  $J = 10.4$  Hz, 1H), 7.43–7.38 (m, 2H), 7.36 (d,  $J = 8.0$  Hz, 1H), 7.23–7.21 (m, 3H), 7.16 (d,  $J = 7.6$  Hz, 2H), 7.10 (td,  $J = 8.4, 2.0$  Hz, 1H), 6.96 (d,  $J = 7.6$  Hz, 2H), 5.50 (s, 2H) ppm;  $^{13}\text{C}\{^1\text{H}\}$  NMR ( $\text{CDCl}_3$ , 100 MHz)  $\delta$  164.1 (d,  $J = 41.7$  Hz), 161.6 (d,  $J = 43.7$  Hz), 161.4 (d,  $J = 2.5$  Hz), 142.8, 138.4 (d,  $J = 7.8$  Hz), 136.2 (d,  $J = 7.5$  Hz), 129.9 (d,  $J = 8.0$  Hz), 129.7 (d,  $J = 7.8$  Hz), 129.3, 129.2, 126.3, 126.2, 124.7, 123.6 (d,  $J = 2.7$  Hz), 118.5 (d,  $J = 21.2$  Hz), 117.6 (d,  $J = 38.5$  Hz), 117.4 (d,  $J = 6.1$  Hz), 115.0 (d,  $J = 23.1$  Hz), 66.9 ppm; HRMS (ESI)  $m/z$   $[\text{M} + \text{H}]^+$  calcd for  $\text{C}_{21}\text{H}_{16}\text{F}_2\text{N}_3^+$  348.1307, found: 348.1313.

#### 4,6-bis(4-fluorophenyl)-1-phenyl-1,2-dihydro-1,3,5-triazine (3ra)

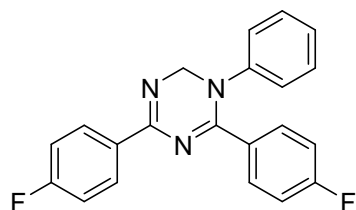

viscous liquid, (54.1 mg, 78%);  $^1\text{H NMR}$  ( $\text{CDCl}_3$ , 400 MHz)  $\delta$  8.33–8.30 (m, 2H), 7.66–7.62 (m, 2H), 7.24 (t,  $J = 7.6$  Hz, 2H), 7.14–7.09 (m, 3H), 6.98–6.92 (m, 4H), 5.46 (s, 2H) ppm;  $^{13}\text{C}\{^1\text{H}\}$  NMR ( $\text{CDCl}_3$ , 100 MHz)  $\delta$  165.8 (d,  $J = 4.8$  Hz), 163.3 (d,  $J = 7.7$  Hz), 161.4, 160.5, 143.1, 132.8 (d,  $J = 8.8$  Hz), 132.3 (d,  $J = 2.9$  Hz), 130.9 (d,  $J = 9.3$  Hz), 130.1 (d,  $J = 8.6$  Hz), 129.6 (d,  $J = 2.6$  Hz), 129.1, 125.9, 124.7, 116.1 (d,  $J = 22.3$  Hz), 115.6 (d,  $J = 66.3$  Hz), 115.4 (d,  $J = 23.0$  Hz), 66.8 ppm; HRMS (ESI)  $m/z$   $[\text{M} + \text{H}]^+$  calcd for  $\text{C}_{21}\text{H}_{16}\text{F}_2\text{N}_3^+$  348.1307, found: 348.1309.

#### 4,6-di(naphthalen-1-yl)-1-phenyl-1,2-dihydro-1,3,5-triazine (3sa)

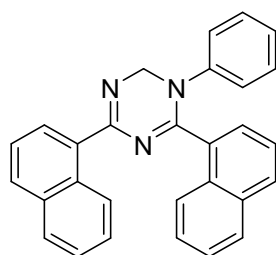

yellow solid (mp: 82–83 °C), (28.7 mg, 35%);  $^1\text{H NMR}$  ( $\text{CDCl}_3$ , 400 MHz)  $\delta$  9.03 (d,  $J = 8.8$  Hz, 1H), 8.26–8.23 (m, 2H), 7.91–7.86 (m, 2H), 7.80–7.74 (m, 2H), 7.64 (d,  $J = 6.8$  Hz, 1H), 7.59–7.54 (m, 1H), 7.52–7.46 (m, 2H), 7.44–7.40 (m, 1H), 7.36–7.32 (m, 1H), 7.05 (t,  $J = 7.6$  Hz, 2H), 6.98–6.94 (m, 3H), 5.79 (s, 2H) ppm;  $^{13}\text{C}\{^1\text{H}\}$  NMR ( $\text{CDCl}_3$ , 100 MHz)  $\delta$  163.3, 162.7, 142.2, 134.4, 134.1, 133.5, 132.0, 131.2, 130.9, 130.8, 130.3, 129.5, 128.8, 128.5, 128.4, 128.2, 127.1, 126.6, 126.5, 126.2, 126.1, 125.7, 125.1, 124.9, 124.2, 124.1, 66.5 ppm; HRMS (ESI)  $m/z$   $[\text{M} + \text{H}]^+$  calcd

for  $C_{29}H_{22}N_3^+$  412.1808, found: 412.1803.

#### 4,6-di(naphthalen-2-yl)-1-phenyl-1,2-dihydro-1,3,5-triazine (3ta)

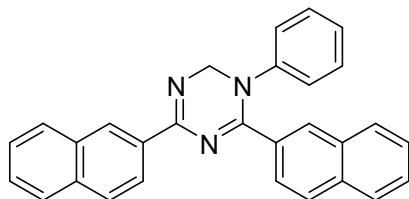

yellow solid (mp: 79–80 °C), (34.4 mg, 42%);  $^1H$  NMR ( $CDCl_3$ , 400 MHz)  $\delta$  8.89 (s, 1H), 8.43 (d,  $J = 8.4$  Hz, 1H), 8.38 (s, 1H), 8.05–8.03 (m, 1H), 7.93 (d,  $J = 8.8$  Hz, 1H), 7.90–7.85 (m, 2H), 7.79 (d,  $J = 7.6$  Hz, 1H), 7.71 (d,  $J = 8.4$  Hz, 1H), 7.62 (dd,  $J = 8.4, 1.6$  Hz, 1H), 7.54–7.53 (m, 1H), 7.52–7.46 (m, 3H), 7.19 (t,  $J = 7.6$  Hz, 2H), 7.09 (t,  $J = 7.2$  Hz, 1H), 7.02–6.99 (m, 2H), 5.61 (s, 2H) ppm;  $^{13}C\{^1H\}$  NMR ( $CDCl_3$ , 100 MHz)  $\delta$  162.4, 161.5, 143.3, 134.7, 134.6, 133.6, 133.1, 132.8, 131.7, 131.5, 129.2, 129.1, 129.0, 128.5, 128.0, 127.9, 127.8, 127.7, 126.9, 126.6, 126.5, 126.2, 125.7, 124.9, 124.7, 67.1, 29.7 ppm; HRMS (ESI)  $m/z$   $[M + H]^+$  calcd for  $C_{29}H_{22}N_3^+$  412.1808, found: 412.1812.

### 5. Characterization data for products 5 and 7

#### 1,2,4,6-tetraphenyl-1,2-dihydro-1,3,5-triazine (5aa and 7aa)<sup>[1]</sup>

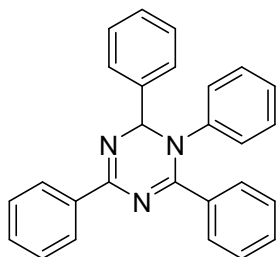

yellow solid (mp: 146–147 °C), (**5aa**: 58.8 mg, 76%; **7aa**: 29.1 mg, 75%);  $^1H$  NMR ( $CDCl_3$ , 400 MHz)  $\delta$  8.39–8.37 (m, 2H), 7.79–7.67 (m, 2H), 7.72 (d,  $J = 7.6$  Hz, 2H), 7.45–7.43 (m, 3H), 7.41–7.33 (m, 4H), 7.32 (t,  $J = 7.6$  Hz, 2H), 7.18–7.15 (m, 2H), 7.11 (t,  $J = 7.2$  Hz, 1H), 7.00 (d,  $J = 7.2$  Hz, 2H), 6.41 (s, 1H) ppm; HRMS (ESI)  $m/z$   $[M + H]^+$  calcd for  $C_{27}H_{22}N_3^+$  388.1808, found: 388.1805.

#### 1,4,6-triphenyl-2-(*o*-tolyl)-1,2-dihydro-1,3,5-triazine (5ab and 7ab)

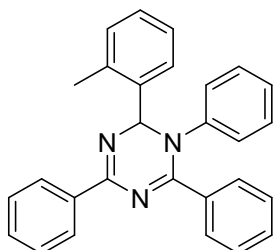

yellow solid (mp: 124–125 °C), (**5ab**: 54.4 mg, 68%; **7ab**: 20.1mg, 50%); <sup>1</sup>H NMR (CDCl<sub>3</sub>, 400 MHz) δ 8.34–8.32 (m, 2H), 7.82 (d, *J* = 8.1 Hz, 2H), 7.63 (d, *J* = 7.6 Hz, 1H), 7.41–7.38 (m, 4H), 7.34 (d, *J* = 7.8 Hz, 2H), 7.30–7.22 (m, 3H), 7.19 (t, *J* = 7.4 Hz, 1H), 7.14–7.05 (m, 2H), 6.89 (d, *J* = 7.6 Hz, 2H), 6.56 (s, 1H), 2.72 (s, 3H) ppm; <sup>13</sup>C{<sup>1</sup>H} NMR (CDCl<sub>3</sub>, 100 MHz) δ 161.0, 157.4, 144.3, 139.6, 136.8, 135.2, 134.8, 131.2, 131.1, 130.2, 128.9, 128.4, 128.2, 128.0, 128.0, 126.6, 126.0, 125.4, 124.9, 76.7, 19.6 ppm; HRMS (ESI) *m/z* [M + H]<sup>+</sup> calcd for C<sub>28</sub>H<sub>24</sub>N<sub>3</sub><sup>+</sup> 402.1965, found: 402.1970.

#### 1,4,6-triphenyl-2-(*m*-tolyl)-1,2-dihydro-1,3,5-triazine (**5ac** and **7ac**)

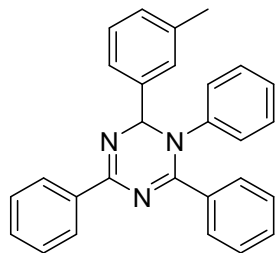

yellow solid (mp: 141–142 °C), (**5ac**: 56.0 mg, 70%; **7ac**: 26.5 mg, 66%); <sup>1</sup>H NMR (CDCl<sub>3</sub>, 400 MHz) δ 8.44–8.42 (m, 2H), 7.84 (d, *J* = 7.6 Hz, 2H), 7.57 (d, *J* = 7.5 Hz, 2H), 7.50–7.49 (m, 3H), 7.45 (t, *J* = 7.3 Hz, 1H), 7.37 (q, *J* = 7.8 Hz, 3H), 7.23 (t, *J* = 7.7 Hz, 3H), 7.16 (t, *J* = 7.1 Hz, 1H), 7.05 (d, *J* = 7.6 Hz, 2H), 6.42 (s, 1H), 2.40 (s, 3H) ppm; <sup>13</sup>C{<sup>1</sup>H} NMR (CDCl<sub>3</sub>, 100 MHz) δ 160.8, 158.2, 144.2, 141.8, 138.6, 136.6, 134.9, 131.2, 130.4, 130.2, 129.3, 128.9, 128.8, 128.4, 128.1, 126.8, 125.9, 124.9, 123.2, 78.8, 21.6 ppm; HRMS (ESI) *m/z* [M + H]<sup>+</sup> calcd for C<sub>28</sub>H<sub>24</sub>N<sub>3</sub><sup>+</sup> 402.1965, found: 402.1962.

#### 1,4,6-triphenyl-2-(*p*-tolyl)-1,2-dihydro-1,3,5-triazine (**5ad** and **7ad**)

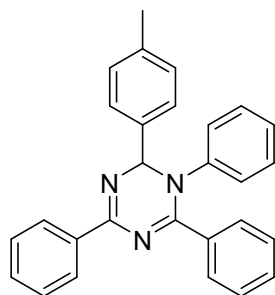

yellow solid (mp: 72–73 °C), (**5ad**: 58.1 mg, 73%; **7ad**: 31.3 mg, 78%); <sup>1</sup>H NMR (CDCl<sub>3</sub>, 400 MHz) δ 8.39–8.37 (m, 2H), 7.78–7.75 (m, 2H), 7.61–7.59 (m, 2H), 7.44 (d, *J* = 5.2 Hz, 3H), 7.39 (t, *J* = 7.6 Hz, 1H), 7.30 (t, *J* = 7.2 Hz, 2H), 7.20 (t, *J* = 7.2 Hz, 2H), 7.17 (t, *J* = 7.2 Hz, 2H), 7.10 (t, *J* = 7.2 Hz, 1H), 7.00 (d, *J* = 7.2 Hz, 2H), 6.37 (s, 1H), 2.33 (s, 3H) ppm; <sup>13</sup>C{<sup>1</sup>H} NMR (CDCl<sub>3</sub>, 100 MHz) δ 160.7, 158.2, 144.2, 139.0, 138.3, 136.6, 134.9, 131.2, 130.4, 130.2, 129.6, 128.9, 128.3, 128.1, 126.1, 125.9, 124.9, 78.6, 21.2 ppm; HRMS (ESI) *m/z* [M + H]<sup>+</sup> calcd for C<sub>28</sub>H<sub>24</sub>N<sub>3</sub><sup>+</sup> 402.1965, found: 402.1968.

#### 2-(2-chlorophenyl)-1,4,6-triphenyl-1,2-dihydro-1,3,5-triazine (**5ae**)

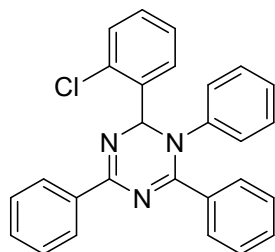

yellow solid (mp: 151–152 °C), (38.0 mg, 45%);  $^1\text{H NMR}$  ( $\text{CDCl}_3$ , 400 MHz)  $\delta$  8.36–8.34 (m, 2H), 7.76 (s, 1H), 7.75–7.72 (m, 2H), 7.51 (dd,  $J = 8.0, 1.2$  Hz, 1H), 7.44–7.38 (m, 4H), 7.34–7.28 (m, 3H), 7.26–7.22 (m, 1H), 7.17–7.08 (m, 3H), 6.90–6.88 (m, 2H), 6.83 (s, 1H) ppm;  $^{13}\text{C}\{^1\text{H}\}$  NMR ( $\text{CDCl}_3$ , 100 MHz)  $\delta$  161.6, 158.3, 143.9, 139.5, 135.0, 131.6, 131.3, 130.6, 130.5, 130.2, 129.8, 129.1, 128.5, 128.2, 128.1, 128.0, 127.9, 126.4, 125.3, 76.3 ppm; HRMS (ESI)  $m/z$   $[\text{M} + \text{H}]^+$  calcd for  $\text{C}_{27}\text{H}_{21}\text{ClN}_3^+$  422.1419, found: 422.1416.

### 2-(2-fluorophenyl)-1,4,6-triphenyl-1,2-dihydro-1,3,5-triazine (7ae)

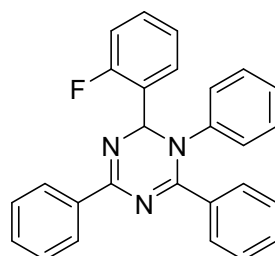

white solid (mp: 146–147 °C), (17.8 mg, 44%);  $^1\text{H NMR}$  ( $\text{CDCl}_3$ , 400 MHz)  $\delta$  8.40–8.38 (m, 2H), 7.74 (d,  $J = 7.6$  Hz, 2H), 7.64 (t,  $J = 7.6$  Hz, 1H), 7.44–7.41 (m, 3H), 7.38–7.26 (m, 5H), 7.16–7.07 (m, 5H), 6.98 (d,  $J = 8.2$  Hz, 2H), 6.76 (s, 1H) ppm;  $^{13}\text{C}\{^1\text{H}\}$  NMR ( $\text{CDCl}_3$ , 100 MHz)  $\delta$  161.4, 160.3, 158.8, 157.8, 143.9, 136.5, 134.8, 131.2, 130.6, 130.4, 130.3, 130.1, 129.0, 128.8, 128.7, 128.4, 128.1, 128.1, 126.2, 125.2, 124.9, 124.9, 116.3, 116.0, 73.3, 73.3 ppm; HRMS (ESI)  $m/z$   $[\text{M} + \text{H}]^+$  calcd for  $\text{C}_{27}\text{H}_{21}\text{FN}_3^+$  406.1714, found: 406.1710.

### 2-(3-chlorophenyl)-1,4,6-triphenyl-1,2-dihydro-1,3,5-triazine (5af)

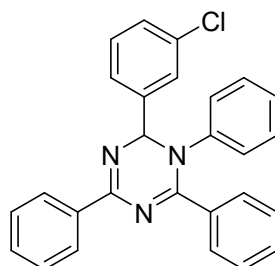

yellow solid (mp: 135–136 °C), (47.5 mg, 67%);  $^1\text{H NMR}$  ( $\text{CDCl}_3$ , 400 MHz)  $\delta$  8.38–8.36 (m, 2H), 7.80 (d,  $J = 7.6$  Hz, 2H), 7.69 (s, 1H), 7.60–7.59 (m, 1H), 7.46–7.44 (m, 3H), 7.41 (d,  $J = 7.2$  Hz, 1H), 7.34–7.31 (m, 4H), 7.21 (t,  $J = 7.2$  Hz, 2H), 7.14 (t,  $J = 7.2$  Hz, 1H), 6.99 (d,  $J = 7.6$  Hz, 2H), 6.39 (s, 1H) ppm;  $^{13}\text{C}\{^1\text{H}\}$  NMR ( $\text{CDCl}_3$ , 100 MHz)  $\delta$  160.8, 158.9, 144.1, 143.7, 134.9, 134.6, 131.5, 130.7, 130.3, 130.2, 129.2, 128.5, 128.2, 128.2, 126.5, 126.2, 124.8, 124.3, 120.9, 78.1 ppm;

**HRMS** (ESI)  $m/z$   $[M + H]^+$  calcd for  $C_{27}H_{21}ClN_3^+$  422.1419, found: 422.1425.

**2-(3-fluorophenyl)-1,4,6-triphenyl-1,2-dihydro-1,3,5-triazine (7af)**

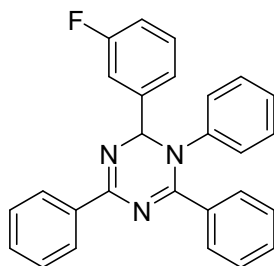

white solid (mp: 179–180 °C), (26.4 mg, 65%);  **$^1H$  NMR** ( $CDCl_3$ , 400 MHz)  $\delta$  8.40–8.37 (m, 2H), 7.80 (d,  $J = 7.3$  Hz, 2H), 7.51 (d,  $J = 7.8$  Hz, 1H), 7.47–7.39 (m, 4H), 7.38–7.29 (m, 4H), 7.20–7.16 (m, 3H), 7.05 (dd,  $J = 8.3, 2.0$  Hz, 1H), 7.00–6.98 (m, 2H), 6.41 (s, 1H) ppm;  **$^{13}C\{^1H\}$  NMR** ( $CDCl_3$ , 100 MHz)  $\delta$  164.3, 161.8, 160.6, 158.8, 144.1, 136.3, 134.5, 131.4, 130.6, 130.5, 130.4, 130.2, 129.1, 128.4, 128.1, 128.1, 126.1, 124.7, 121.7, 121.7, 115.5, 115.3, 113.5, 113.2, 78.0, 77.9 ppm; **HRMS** (ESI)  $m/z$   $[M + H]^+$  calcd for  $C_{27}H_{21}FN_3^+$  406.1714, found: 406.1711.

**2-(4-chlorophenyl)-1,4,6-triphenyl-1,2-dihydro-1,3,5-triazine (5ag and 7al)**

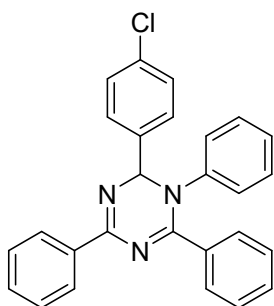

yellow solid (mp: 69–70 °C), (**5ag**: 63.4 mg, 76%; **7al**: 31.2 mg, 74%);  **$^1H$  NMR** ( $CDCl_3$ , 400 MHz)  $\delta$  8.38–8.36 (m, 2H), 7.77 (d,  $J = 7.1$  Hz, 2H), 7.65 (d,  $J = 8.3$  Hz, 2H), 7.45–7.42 (m, 3H), 7.38 (t,  $J = 6.7$  Hz, 3H), 7.31 (t,  $J = 7.8$  Hz, 2H), 7.19 (t,  $J = 7.1$  Hz, 2H), 7.12–7.08 (m, 1H), 6.98 (d,  $J = 7.8$  Hz, 2H), 6.38 (s, 1H) ppm;  **$^{13}C\{^1H\}$  NMR** ( $CDCl_3$ , 100 MHz)  $\delta$  160.7, 158.6, 144.1, 140.3, 136.4, 134.5, 134.3, 131.4, 130.6, 130.1, 129.1, 128.4, 128.1, 128.1, 127.6, 126.1, 124.8, 78.1 ppm; **HRMS** (ESI)  $m/z$   $[M + H]^+$  calcd for  $C_{27}H_{21}ClN_3^+$  422.1419, found: 422.1408.

**2-(4-fluorophenyl)-1,4,6-triphenyl-1,2-dihydro-1,3,5-triazine (5ah and 7ag)**

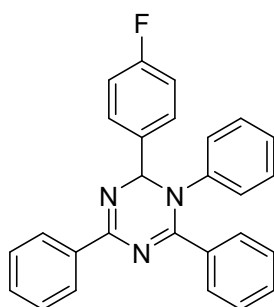

white solid (mp: 125–126 °C), (**5ah**: 55.3 mg, 69%; **7ag**: 32.4 mg, 80%);  **$^1H$  NMR** ( $CDCl_3$ , 400 MHz)  $\delta$  8.39–8.37 (m, 2H), 7.77 (d,  $J = 8.1$  Hz, 2H), 7.70–7.66 (m, 2H),



7.46–7.44 (m, 3H), 7.41–7.37 (m, 1H), 7.32 (t,  $J = 7.8$  Hz, 2H), 7.20–7.16 (m, 2H), 7.13–7.05 (m, 3H), 6.99 (d,  $J = 7.7$  Hz, 2H), 6.38 (s, 1H) ppm;  $^{13}\text{C}\{^1\text{H}\}$  NMR ( $\text{CDCl}_3$ , 100 MHz)  $\delta$  164.0, 161.5, 160.6, 158.5, 144.1, 137.7, 137.7, 136.4, 134.6, 131.1, 130.6, 130.1, 129.1, 128.4, 128.1, 128.1, 128.0, 127.9, 126.1, 124.8, 115.9, 115.7, 78.0 ppm; HRMS (ESI)  $m/z$   $[\text{M} + \text{H}]^+$  calcd for  $\text{C}_{27}\text{H}_{21}\text{FN}_3^+$  406.1714, found: 406.1710.

### 2-(naphthalen-1-yl)-1,4,6-triphenyl-1,2-dihydro-1,3,5-triazine (5ai and 7ai)

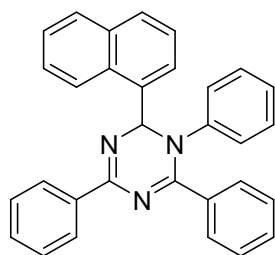

yellow solid (mp: 146–147 °C), (**5ai**: 22.3 mg, 26%; **7ai**: 25.4 mg, 58%);  $^1\text{H}$  NMR ( $\text{CDCl}_3$ , 400 MHz)  $\delta$  8.83 (d,  $J = 8.5$  Hz, 1H), 8.32–8.30 (m, 2H), 7.94–7.89 (m, 3H), 7.85 (d,  $J = 8.2$  Hz, 1H), 7.81 (d,  $J = 7.1$  Hz, 1H), 7.68–7.64 (m, 1H), 7.57 (t,  $J = 7.2$  Hz, 1H), 7.46–7.35 (m, 7H), 7.14–7.06 (m, 4H), 6.93 (d,  $J = 6.8$  Hz, 2H) ppm;  $^{13}\text{C}\{^1\text{H}\}$  NMR ( $\text{CDCl}_3$ , 100 MHz)  $\delta$  160.9, 157.6, 144.3, 136.6, 136.2, 134.7, 134.3, 131.3, 130.4, 130.3, 130.1, 128.9, 128.9, 128.5, 128.5, 128.1, 128.0, 126.4, 126.0, 125.5, 125.3, 124.8, 122.7, 77.1 ppm; HRMS (ESI)  $m/z$   $[\text{M} + \text{H}]^+$  calcd for  $\text{C}_{31}\text{H}_{24}\text{N}_3^+$  438.1965, found: 438.1968.

### 2-(naphthalen-2-yl)-1,4,6-triphenyl-1,2-dihydro-1,3,5-triazine (5aj and 7ah)

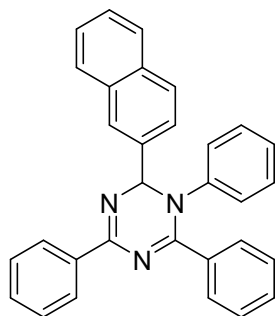

yellow solid (mp: 74–75 °C), (**5aj**: 25.7 mg, 30%; **7ah**: 29.3 mg, 67%);  $^1\text{H}$  NMR ( $\text{CDCl}_3$ , 400 MHz)  $\delta$  8.40–8.38 (m, 2H), 8.11 (s, 1H), 7.88 (s, 2H), 7.84–7.80 (m, 4H), 7.48–7.43 (m, 5H), 7.39 (d,  $J = 7.0$  Hz, 1H), 7.33 (t,  $J = 7.1$  Hz, 2H), 7.18 (t,  $J = 7.1$  Hz, 2H), 7.11 (t,  $J = 7.0$  Hz, 1H), 7.03 (d,  $J = 7.9$  Hz, 2H), 6.56 (s, 1H) ppm;  $^{13}\text{C}\{^1\text{H}\}$  NMR ( $\text{CDCl}_3$ , 100 MHz)  $\delta$  160.9, 158.5, 144.2, 139.2, 136.6, 134.9, 133.4, 133.3, 131.2, 130.5, 130.2, 129.1, 129.0, 128.4, 128.3, 128.1, 128.1, 127.7, 126.3, 126.3, 126.0, 125.0, 124.9, 124.4, 79.1 ppm; HRMS (ESI)  $m/z$   $[\text{M} + \text{H}]^+$  calcd for  $\text{C}_{31}\text{H}_{24}\text{N}_3^+$  438.1965, found: 438.1972.

### 1,4,6-triphenyl-2-(pyridin-4-yl)-1,2-dihydro-1,3,5-triazine (5ak)

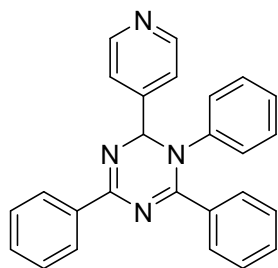

yellow solid (mp: 118–119 °C), (32.0 mg, 25%);  $^1\text{H NMR}$  ( $\text{CDCl}_3$ , 400 MHz)  $\delta$  8.80 (d,  $J = 4.0$  Hz, 3H), 8.59 (dd,  $J = 4.4$  Hz,  $J = 1.2$  Hz, 3H), 8.11 (d,  $J = 5.6$  Hz, 1H), 7.95 (d,  $J = 5.2$  Hz, 1H), 7.86–7.83 (m, 1H), 7.69–7.68 (m, 3H), 7.52–7.20 (m, 2H), 7.48–7.42 (m, 5H), 7.18 (s, 1H) ppm;  $^{13}\text{C}\{^1\text{H}\}$  NMR ( $\text{CDCl}_3$ , 100 MHz)  $\delta$  165.9, 160.4, 152.1, 150.3, 145.2, 137.8, 134.1, 130.9, 128.7, 128.7, 127.7, 126.1, 124.4, 121.3 ppm; HRMS (ESI)  $m/z$   $[\text{M} + \text{H}]^+$  calcd for  $\text{C}_{26}\text{H}_{21}\text{N}_4^+$  389.1761, found: 389.1768.

### 2-phenethyl-1,4,6-triphenyl-1,2-dihydro-1,3,5-triazine (5a)

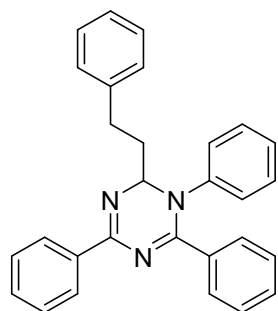

viscous liquid, (56.3 mg, 68%);  $^1\text{H NMR}$  ( $\text{CDCl}_3$ , 400 MHz)  $\delta$  8.40–8.38 (m, 2H), 7.74–7.72 (m, 2H), 7.47–7.46 (m, 3H), 7.38 (t,  $J = 7.2$  Hz, 1H), 7.30–7.27 (m, 6H), 7.20–7.17 (m, 1H), 7.16 (t,  $J = 7.6$  Hz, 2H), 7.06 (t,  $J = 7.6$  Hz, 1H), 6.93 (d,  $J = 7.6$  Hz, 2H), 5.53–5.49 (m, 1H), 3.10–2.98 (m, 2H), 2.54–2.45 (m, 1H), 2.27–2.18 (m, 1H) ppm;  $^{13}\text{C}\{^1\text{H}\}$  NMR ( $\text{CDCl}_3$ , 100 MHz)  $\delta$  160.5, 158.9, 144.1, 141.5, 136.6, 135.0, 131.3, 130.5, 130.2, 129.1, 128.6, 128.5, 128.4, 128.2, 128.0, 126.1, 125.5, 124.5, 76.4, 36.4, 31.2 ppm; HRMS (ESI)  $m/z$   $[\text{M} + \text{H}]^+$  calcd for  $\text{C}_{29}\text{H}_{26}\text{N}_4^+$  416.2121, found: 416.2125.

### 2-(2,6-dimethylhept-5-en-1-yl)-1,4,6-triphenyl-1,2-dihydro-1,3,5-triazine (5an)

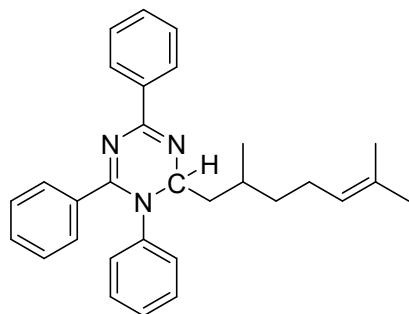

yellow oil (38.8 mg, 45%), dr = 1:1;  $^1\text{H NMR}$  ( $\text{CDCl}_3$ , 600 MHz)  $\delta$  8.38–8.36 (m, 4H), 7.77–7.73 (m, 4H), 7.47–7.45 (m, 6H), 7.39 (t,  $J = 7.2$  Hz, 2H), 7.31 (t,  $J = 7.2$  Hz, 4H), 7.19 (t,  $J = 7.8$  Hz, 4H), 7.10–7.07 (m, 2H), 6.98 (t,  $J = 7.2$  Hz, 4H),

5.59–5.54 (m, 2H), 5.15 (t,  $J = 7.2$  Hz, 1H), 5.09 (t,  $J = 6.6$  Hz, 1H), 2.30–2.26 (m, 1H), 2.10–1.97 (m, 8H), 1.93–1.89 (m, 1H), 1.70 (s, 3H), 1.64 (s, 3H), 1.60 (s, 3H), 1.56 (s, 3H), 1.48–1.43 (m, 1H), 1.37–1.30 (m, 3H), 1.20 (d,  $J = 6.6$  Hz, 3H), 1.12 (d,  $J = 6.6$  Hz, 3H) ppm.

#### 2-(furan-2-yl)-1,4,6-triphenyl-1,2-dihydro-1,3,5-triazine (7aj)

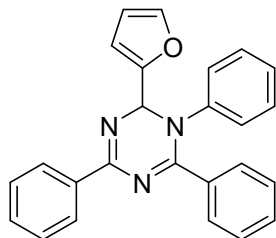

white solid, (20.8 mg, 55%);  $^1\text{H NMR}$  ( $\text{CDCl}_3$ , 400 MHz)  $\delta$  8.45–8.42 (m, 2H), 7.67–7.65 (m, 2H), 7.50–7.47 (m, 4H), 7.36–7.32 (m, 1H), 7.27 (dd,  $J = 6.6, 1.4$  Hz, 2H), 7.23 (d,  $J = 4.3$  Hz, 4H), 7.15–7.10 (m, 1H), 6.54 (s, 1H), 6.42 (d,  $J = 3.3$  Hz, 1H), 6.33 (q,  $J = 1.8$  Hz, 1H) ppm;  $^{13}\text{C}\{^1\text{H}\}$  NMR ( $\text{CDCl}_3$ , 100 MHz)  $\delta$  160.8, 160.0, 152.0, 143.6, 143.0, 136.2, 134.5, 131.2, 130.7, 130.3, 129.0, 128.3, 128.2, 128.2, 125.8, 125.1, 110.6, 108.8, 72.4 ppm; HRMS (ESI)  $m/z$   $[\text{M} + \text{H}]^+$  calcd for  $\text{C}_{25}\text{H}_{20}\text{N}_3\text{O}^+$  378.1601, found: 378.1597.

#### 1,4,6-triphenyl-2-(thiophen-2-yl)-1,2-dihydro-1,3,5-triazine (7ak)

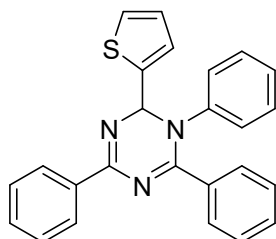

white solid (mp: 102–103 °C), (13.0 mg, 33%);  $^1\text{H NMR}$  ( $\text{CDCl}_3$ , 400 MHz)  $\delta$  8.42–8.40 (m, 2H), 7.77(d, 2H,  $J = 8$  Hz), 7.48–7.45 (m, 3H), 7.40–7.36 (m, 1H), 7.32–7.20(m, 6H), 7.13–7.10(m, 3H), 6.99(t,  $J = 8$  Hz, 1H), 6.66 (s, 1H) ppm;  $^{13}\text{C}\{^1\text{H}\}$  NMR ( $\text{CDCl}_3$ , 100 MHz)  $\delta$  160.2, 159.6, 144.8, 143.7, 136.3, 134.5, 131.3, 130.6, 130.3, 129.1, 128.3, 128.2, 128.1, 126.7, 125.9, 125.4, 125.1, 124.6, 74.8 ppm; HRMS (ESI)  $m/z$   $[\text{M} + \text{H}]^+$  calcd for  $\text{C}_{25}\text{H}_{20}\text{N}_3\text{S}^+$  394.1372, found: 394.1368.

#### 2,4,6-triphenyl-1-(*o*-tolyl)-1,2-dihydro-1,3,5-triazine (5ba and 7ba)

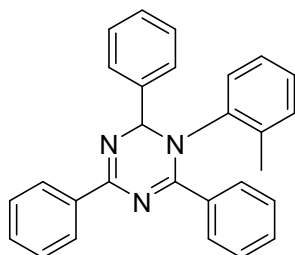

yellow solid (mp: 78–79 °C), (**5ba**: 37.0 mg, 46%; **7ba**: 13.7 mg, 34%);  $^1\text{H NMR}$  ( $\text{CDCl}_3$ , 400 MHz)  $\delta$  8.38–8.35 (m, 2H), 7.74 (d,  $J = 7.4$  Hz, 2H), 7.67 (d,  $J = 6.7$  Hz, 2H), 7.45–7.31 (m, 8H), 7.24 (d,  $J = 7.1$  Hz, 2H), 7.12–7.10 (m, 2H), 7.00–6.99 (m, 1H), 6.12 (s, 1H), 2.06 (s, 3H) ppm;  $^{13}\text{C}\{^1\text{H}\}$  NMR ( $\text{CDCl}_3$ , 100 MHz)  $\delta$  162.0, 158.9,

142.9, 142.2, 136.9, 135.1, 134.9, 131.4, 131.1, 130.3, 130.0, 128.9, 128.6, 128.3, 128.1, 128.0, 127.9, 126.7, 126.6, 79.6, 18.0 ppm; **HRMS** (ESI)  $m/z$   $[M + H]^+$  calcd for  $C_{28}H_{24}N_3^+$  402.1965, found: 402.1959.

**2,4,6-triphenyl-1-(*m*-tolyl)-1,2-dihydro-1,3,5-triazine (5ca and 7ca)**

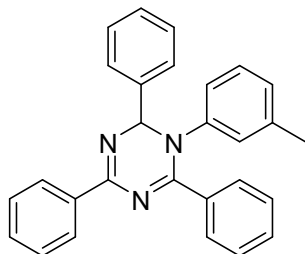

yellow solid (mp: 146–147 °C), (**5ca**: 57.6 mg, 72%; **7ca**: 22.5 mg, 56%);  **$^1H$  NMR** ( $CDCl_3$ , 400 MHz)  $\delta$  8.43–8.41 (m, 2H), 7.85 (d,  $J = 7.5$  Hz, 2H), 7.77 (d,  $J = 7.4$  Hz, 2H), 7.49–7.47 (m, 3H), 7.45 (t,  $J = 7.1$  Hz, 3H), 7.39–7.33 (m, 3H), 7.10 (t,  $J = 7.7$  Hz, 1H), 6.97 (d,  $J = 7.5$  Hz, 2H), 6.87 (s, 1H), 6.84 (d,  $J = 7.9$  Hz, 1H), 6.44 (s, 1H), 2.24 (s, 3H) ppm;  **$^{13}C\{^1H\}$  NMR** ( $CDCl_3$ , 100 MHz)  $\delta$  160.7, 158.5, 144.2, 141.8, 139.0, 136.6, 134.8, 131.2, 130.4, 130.2, 128.9, 128.7, 128.4, 128.3, 128.1, 126.8, 126.1, 125.3, 122.2, 78.6, 21.3 ppm; **HRMS** (ESI)  $m/z$   $[M + H]^+$  calcd for  $C_{28}H_{24}N_3^+$  402.1965, found: 402.1967.

**2,4,6-triphenyl-1-(*p*-tolyl)-1,2-dihydro-1,3,5-triazine (5da and 7da)**

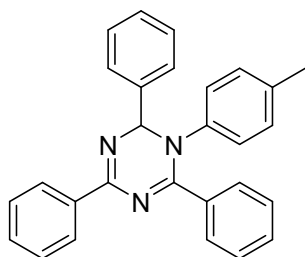

yellow solid (mp: 138–139 °C), (**5da**: 61.2 mg, 77%; **7da**: 30.1 mg, 75%);  **$^1H$  NMR** ( $CDCl_3$ , 400 MHz)  $\delta$  8.44–8.42 (m, 2H), 7.84 (d,  $J = 7.3$  Hz, 2H), 7.77 (d,  $J = 7.3$  Hz, 2H), 7.49–7.40 (m, 6H), 7.38–7.33 (m, 3H), 7.02 (d,  $J = 8.2$  Hz, 2H), 6.94 (d,  $J = 8.3$  Hz, 2H), 6.42 (s, 1H), 2.29 (s, 3H) ppm;  **$^{13}C\{^1H\}$  NMR** ( $CDCl_3$ , 100 MHz)  $\delta$  160.7, 158.4, 141.9, 141.7, 136.6, 135.9, 134.9, 131.1, 130.4, 130.2, 129.6, 128.9, 128.4, 128.3, 128.1, 126.2, 124.8, 78.8, 20.9 ppm; **HRMS** (ESI)  $m/z$   $[M + H]^+$  calcd for  $C_{28}H_{24}N_3^+$  402.1965, found: 402.1963.

**1-(2-fluorophenyl)-2,4,6-triphenyl-1,2-dihydro-1,3,5-triazine (5ea and 7ea)**

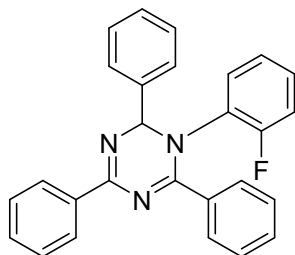

yellow solid (mp: 137–138 °C), (**5ea**: 37.7 mg, 47%; **7ea**: 19.1 mg, 47%);  **$^1H$  NMR**

(CDCl<sub>3</sub>, 400 MHz)  $\delta$  8.43–8.41 (m, 2H), 7.82 (d,  $J$  = 7.6 Hz, 2H), 7.73 (d,  $J$  = 7.3 Hz, 2H), 7.49–7.38 (m, 7H), 7.36 (t,  $J$  = 7.6 Hz, 2H), 7.17–7.13 (m, 2H), 7.06 (d,  $J$  = 7.6 Hz, 1H), 6.94 (t,  $J$  = 9.6 Hz, 1H), 6.34 (s, 1H) ppm; <sup>13</sup>C{<sup>1</sup>H} NMR (CDCl<sub>3</sub>, 100 MHz)  $\delta$  161.9, 158.6, 141.5, 136.6, 134.6, 132.2, 132.1, 131.4, 130.5, 129.6, 128.8, 128.5, 128.4, 128.4, 128.2, 128.1, 128.1, 126.4, 124.7, 124.7, 116.6, 116.4, 79.0 ppm; HRMS (ESI)  $m/z$  [M + H]<sup>+</sup> calcd for C<sub>27</sub>H<sub>21</sub>FN<sub>3</sub><sup>+</sup> 406.1714, found: 406.1719.

#### 1-(3-fluorophenyl)-2,4,6-triphenyl-1,2-dihydro-1,3,5-triazine (5fa and 7fa)

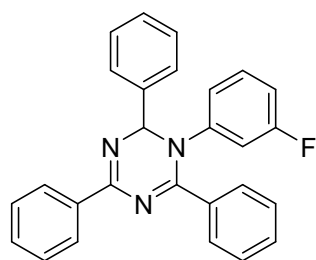

yellow solid (mp: 126–127 °C), (**5fa**: 51.0 mg, 63%; **7fa**: 21.5 mg, 53%); <sup>1</sup>H NMR (CDCl<sub>3</sub>, 400 MHz)  $\delta$  8.43–8.41 (m, 2H), 7.84 (d,  $J$  = 7.6 Hz, 2H), 7.74 (d,  $J$  = 7.4 Hz, 2H), 7.50–7.42 (m, 6H), 7.40 (t,  $J$  = 7.8 Hz, 3H), 7.18 (q,  $J$  = 7.8 Hz, 1H), 6.88–6.77 (m, 3H), 6.45 (s, 1H) ppm; <sup>13</sup>C{<sup>1</sup>H} NMR (CDCl<sub>3</sub>, 100 MHz)  $\delta$  163.8, 161.3, 160.5, 158.2, 145.8, 145.7, 141.2, 136.3, 134.4, 131.6, 130.6, 130.1, 130.1, 130.0, 129.0, 128.6, 128.5, 128.1, 128.1, 126.0, 120.5, 120.5, 112.9, 112.7, 112.0, 111.7, 78.6 ppm; HRMS (ESI)  $m/z$  [M + H]<sup>+</sup> calcd for C<sub>27</sub>H<sub>21</sub>FN<sub>3</sub><sup>+</sup> 406.1714, found: 406.1713.

#### 1-(4-fluorophenyl)-2,4,6-triphenyl-1,2-dihydro-1,3,5-triazine (5ga and 7ga)

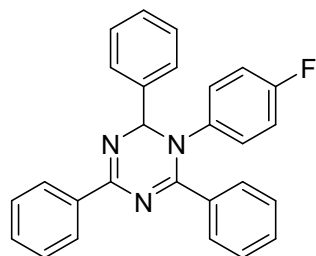

yellow solid (mp: 63–64 °C), (**5ga**: 65.3 mg, 81%; **7ga**: 27.6 mg, 68%); <sup>1</sup>H NMR (CDCl<sub>3</sub>, 400 MHz)  $\delta$  8.42–8.41 (m, 2H), 7.80 (d,  $J$  = 7.6 Hz, 2H), 7.74 (d,  $J$  = 7.5 Hz, 2H), 7.49–7.34 (m, 9H), 7.02–6.98 (m, 2H), 6.93 (t,  $J$  = 8.2 Hz, 2H), 6.39 (s, 1H) ppm; <sup>13</sup>C{<sup>1</sup>H} NMR (CDCl<sub>3</sub>, 100 MHz)  $\delta$  161.7, 160.7, 159.3, 158.3, 141.6, 140.3, 140.3, 136.4, 134.5, 131.3, 130.5, 130.1, 129.0, 128.6, 128.4, 128.1, 128.1, 126.6, 126.6, 126.1, 116.0, 115.8, 79.0 ppm; HRMS (ESI)  $m/z$  [M + H]<sup>+</sup> calcd for C<sub>27</sub>H<sub>21</sub>FN<sub>3</sub><sup>+</sup> 406.1714, found: 406.1721.

#### 1-(2,4-dimethylphenyl)-2,4,6-triphenyl-1,2-dihydro-1,3,5-triazine (5ha and 7ia)

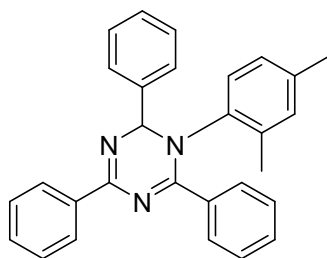

yellow solid (mp: 72–73 °C), (**5ha**: 19.9 mg, 24%; **7ia**: 15.0 mg, 36%);  $^1\text{H NMR}$  ( $\text{CDCl}_3$ , 400 MHz)  $\delta$  8.37–8.34 (m, 2H), 7.74 (d,  $J = 7.3$  Hz, 2H), 7.65 (d,  $J = 7.9$  Hz, 2H), 7.44–7.32 (m, 7H), 7.25 (d,  $J = 7.2$  Hz, 2H), 7.00 (d,  $J = 8.0$  Hz, 1H), 6.89 (d,  $J = 8.2$  Hz, 1H), 6.80 (s, 1H), 6.07 (s, 1H), 2.22 (s, 3H), 2.02 (s, 3H) ppm;  $^{13}\text{C}\{^1\text{H}\}$  NMR ( $\text{CDCl}_3$ , 100 MHz)  $\delta$  162.1, 158.8, 142.3, 140.3, 137.7, 137.0, 135.2, 134.5, 132.0, 131.0, 130.3, 129.9, 128.9, 128.6, 128.2, 128.1, 128.0, 128.0, 127.4, 126.7, 79.8, 20.9, 17.9 ppm; HRMS (ESI)  $m/z$   $[\text{M} + \text{H}]^+$  calcd for  $\text{C}_{29}\text{H}_{26}\text{N}_3^+$  416.2121, found: 416.2128.

#### 1-(3,5-dimethylphenyl)-2,4,6-triphenyl-1,2-dihydro-1,3,5-triazine (**5ia** and **7ha**)

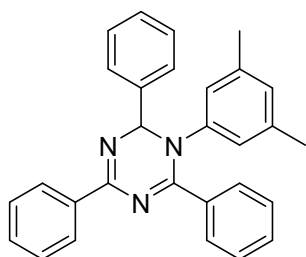

yellow solid (mp: 133–134 °C), (**5ia**: 36.2 mg, 44%; **7ha**: 17.0 mg, 41%);  $^1\text{H NMR}$  ( $\text{CDCl}_3$ , 400 MHz)  $\delta$  8.42–8.40 (m, 2H), 7.86 (d,  $J = 7.3$  Hz, 2H), 7.75 (d,  $J = 7.4$  Hz, 2H), 7.48–7.46 (m, 3H), 7.44 (t,  $J = 7.2$  Hz, 3H), 7.38 (q,  $J = 6.8$  Hz, 3H), 6.78 (s, 1H), 6.65 (s, 2H), 6.41 (s, 1H), 2.18 (s, 6H) ppm;  $^{13}\text{C}\{^1\text{H}\}$  NMR ( $\text{CDCl}_3$ , 100 MHz)  $\delta$  160.7, 158.6, 144.2, 141.8, 138.6, 136.6, 134.9, 131.1, 130.4, 130.1, 128.8, 128.3, 128.3, 128.1, 128.0, 127.7, 126.1, 122.7, 78.5, 21.2 ppm; HRMS (ESI)  $m/z$   $[\text{M} + \text{H}]^+$  calcd for  $\text{C}_{29}\text{H}_{26}\text{N}_3^+$  416.2121, found: 416.2119.

#### 1-(naphthalen-1-yl)-2,4,6-triphenyl-1,2-dihydro-1,3,5-triazine (**5ja**)

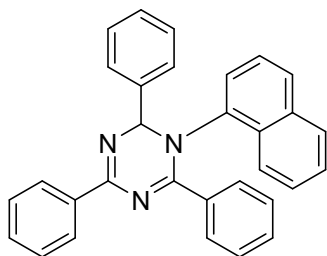

yellow solid (mp: 138–139 °C), (51.7 mg, 59%);  $^1\text{H NMR}$  ( $\text{CDCl}_3$ , 400 MHz)  $\delta$  8.94 (s, 1H), 7.96–7.93 (m, 3H), 7.72 (d,  $J = 8.0$  Hz, 1H), 7.56–7.52 (m, 1H), 7.47–7.41 (m, 7H), 7.40–7.37 (m, 3H), 7.33–7.24 (m, 4H), 6.90 (d,  $J = 8.4$  Hz, 1H), 5.94 (s, 1H), 5.80 (s, 1H) ppm;  $^{13}\text{C}\{^1\text{H}\}$  NMR ( $\text{CDCl}_3$ , 100 MHz)  $\delta$  153.1, 145.7, 135.5, 133.8, 130.9, 129.1, 128.7, 128.3, 127.5, 127.4, 126.8, 126.2, 125.9, 124.6, 124.6, 29.8 ppm;

HRMS (ESI)  $m/z$   $[M + H]^+$  calcd for  $C_{31}H_{24}N_3^+$  438.1965, found: 438.1961.

**1-benzyl-2,4,6-triphenyl-1,2-dihydro-1,3,5-triazine (5ka and 7ka)**

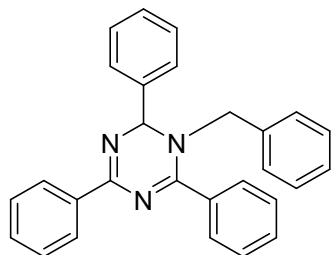

yellow solid (mp: 141–142 °C), (**5ka**: 44.9 mg, 56%; **7ka**: 18.9 mg, 47%);  $^1H$  NMR ( $CDCl_3$ , 400 MHz)  $\delta$  8.28–8.26 (m, 2H), 7.64–7.62 (m, 2H), 7.57 (d,  $J = 6.8$  Hz, 2H), 7.46–7.43 (m, 3H), 7.42–7.36 (m, 7H), 7.30–7.26 (m, 2H), 7.22 (d,  $J = 7.0$  Hz, 2H), 5.99 (s, 1H), 4.97 (d,  $J = 15.4$  Hz, 1H), 4.17 (d,  $J = 15.4$  Hz, 1H) ppm;  $^{13}C\{^1H\}$  NMR ( $CDCl_3$ , 100 MHz)  $\delta$  164.1, 158.9, 141.3, 137.0, 135.6, 134.7, 130.8, 130.3, 129.0, 129.0, 128.8, 128.8, 128.7, 128.1, 128.1, 127.9, 127.4, 126.7, 74.0, 53.0 ppm; HRMS (ESI)  $m/z$   $[M + H]^+$  calcd for  $C_{28}H_{24}N_3^+$  402.1965, found: 402.1957.

**2,4,6-triphenyl-1-(pyridin-2-yl)-1,2-dihydro-1,3,5-triazine (5la)**

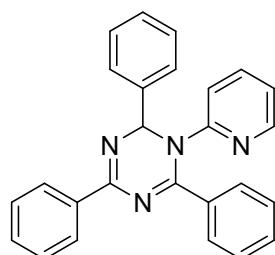

yellow solid (mp: 152–153 °C), (32.0 mg, 41%);  $^1H$  NMR ( $CDCl_3$ , 400 MHz)  $\delta$  8.46–8.44 (m, 3H), 7.82 (d,  $J = 7.6$  Hz, 2H), 7.74–7.72 (m, 2H), 7.49–7.47 (m, 3H), 7.43 (t,  $J = 7.6$  Hz, 1H), 7.36–7.27 (m, 6H), 7.18 (s, 1H), 6.99–6.96 (m, 1H), 6.59 (d,  $J = 8.0$  Hz, 1H) ppm;  $^{13}C\{^1H\}$  NMR ( $CDCl_3$ , 100 MHz)  $\delta$  159.8, 159.7, 155.1, 148.8, 140.1, 136.9, 136.2, 135.3, 134.7, 131.8, 130.8, 129.8, 128.2, 127.0, 125.1, 119.6, 118.5, 73.3 ppm; HRMS (ESI)  $m/z$   $[M + H]^+$  calcd for  $C_{26}H_{21}N_4^+$  389.1761, found: 389.1763.

**1,2-diphenyl-4,6-di-*o*-tolyl-1,2-dihydro-1,3,5-triazine (5ma and 7la)**

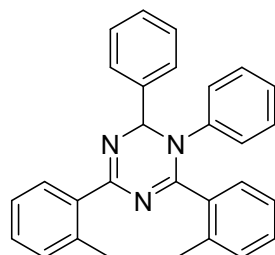

yellow solid (mp: 115–116 °C), (**5na**: 53.9 mg, 65%; **7la**: 19.1 mg, 46%);  $^1H$  NMR ( $CDCl_3$ , 400 MHz)  $\delta$  7.70–7.68 (m, 1H), 7.62–7.59 (m, 2H), 7.37–7.31 (m, 3H), 7.20–7.09 (m, 4H), 7.06–6.97 (m, 5H), 6.94 (t,  $J = 7.6$  Hz, 1H), 6.85–6.83 (m, 2H), 6.27 (s, 1H), 2.43 (s, 3H), 2.33 (s, 3H) ppm;  $^{13}C\{^1H\}$  NMR ( $CDCl_3$ , 100 MHz)  $\delta$

162.2, 161.3, 142.6, 142.4, 137.8, 137.0, 136.9, 134.6, 130.9, 130.8, 129.6, 129.5, 129.0, 128.9, 126.9, 126.3, 125.5, 79.7, 21.0, 20.2 ppm; **HRMS** (ESI)  $m/z$   $[M + H]^+$  calcd for  $C_{29}H_{26}N_3^+$  416.2121, found: 416.2115.

#### 1,2-diphenyl-4,6-di-*m*-tolyl-1,2-dihydro-1,3,5-triazine (**5na** and **7ma**)

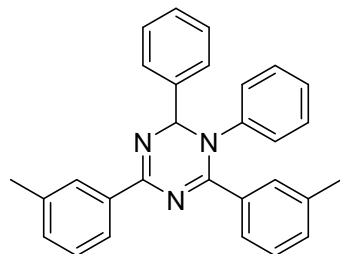

yellow solid (mp: 114–115 °C), (**5oa**: 48.5 mg, 58%; **7ma**: 24.9 mg, 60%); **<sup>1</sup>H NMR** ( $CDCl_3$ , 400 MHz)  $\delta$  8.20 (d,  $J = 9.6$  Hz, 2H), 7.71 (t,  $J = 7.6$  Hz, 3H), 7.45 (d,  $J = 7.2$  Hz, 1H), 7.40 (t,  $J = 7.2$  Hz, 2H), 7.34–7.31 (m, 2H), 7.27 (d,  $J = 7.2$  Hz, 1H), 7.18–7.13 (m, 4H), 7.11–7.06 (m, 1H), 6.99 (d,  $J = 7.6$  Hz, 2H), 6.39 (s, 1H), 2.41 (s, 3H), 2.31 (s, 3H) ppm; **<sup>13</sup>C{<sup>1</sup>H} NMR** ( $CDCl_3$ , 100 MHz)  $\delta$  160.9, 158.6, 144.4, 141.9, 138.3, 137.7, 136.6, 134.7, 132.1, 131.3, 130.7, 128.9, 128.6, 128.5, 128.1, 128.0, 127.4, 126.2, 125.9, 125.4, 124.9, 78.8, 21.5, 21.4 ppm; **HRMS** (ESI)  $m/z$   $[M + H]^+$  calcd for  $C_{29}H_{26}N_3^+$  416.2121, found: 416.2124.

#### 1,2-diphenyl-4,6-di-*p*-tolyl-1,2-dihydro-1,3,5-triazine (**5oa** and **7na**)

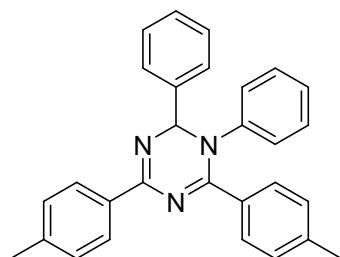

yellow solid (mp: 72–73 °C), (**5pa**: 58.9 mg, 71%; **7na**: 31.2 mg, 75%); **<sup>1</sup>H NMR** ( $CDCl_3$ , 400 MHz)  $\delta$  8.27–8.25 (m, 2H), 7.70 (t,  $J = 8.4$  Hz, 4H), 7.38 (t,  $J = 7.2$  Hz, 2H), 7.33 (t,  $J = 7.2$  Hz, 1H), 7.24 (m, 2H), 7.18–7.14 (m, 2H), 7.10 (d,  $J = 7.6$  Hz, 3H), 7.00 (d,  $J = 8.0$  Hz, 2H), 6.38 (s, 1H), 2.39 (s, 3H), 2.32 (s, 3H) ppm; **<sup>13</sup>C{<sup>1</sup>H} NMR** ( $CDCl_3$ , 100 MHz)  $\delta$  160.5, 158.5, 144.6, 141.9, 141.7, 140.6, 133.9, 131.9, 130.2, 129.1, 128.9, 128.8, 128.4, 128.1, 126.2, 125.7, 124.8, 78.6, 21.6, 21.5 ppm; **HRMS** (ESI)  $m/z$   $[M + H]^+$  calcd for  $C_{29}H_{26}N_3^+$  416.2121, found: 416.2110.

#### 4,6-bis(2-fluorophenyl)-1,2-diphenyl-1,2-dihydro-1,3,5-triazine (**5pa**)

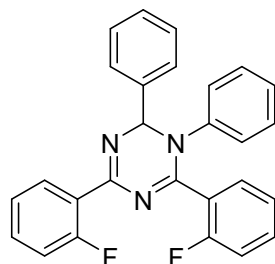

yellow solid (mp: 122–123 °C), (36.4 mg, 43%); **<sup>1</sup>H NMR** ( $CDCl_3$ , 400 MHz)  $\delta$  7.98



(td,  $J = 7.6, 1.6$  Hz, 1H), 7.89 (td,  $J = 7.2, 1.2$  Hz, 1H), 7.79 (d,  $J = 7.2$  Hz, 2H), 7.45–7.41 (m, 2H), 7.39–7.31 (m, 3H), 7.20–7.09 (m, 6H), 7.02–7.00 (m, 2H), 6.85–6.81 (m, 1H), 6.43 (s, 1H) ppm;  $^{13}\text{C}\{^1\text{H}\}$  NMR ( $\text{CDCl}_3$ , 100 MHz)  $\delta$  162.6, 160.1, 158.6, 158.1, 157.6 (d,  $J = 4.1$  Hz), 142.7, 141.3, 133.1 (d,  $J = 8.6$  Hz), 132.2 (d,  $J = 2.2$  Hz), 131.6 (d,  $J = 1.9$  Hz), 131.4 (d,  $J = 8.6$  Hz), 128.9, 128.7, 128.6, 126.8, 126.6 (d,  $J = 2.2$  Hz), 125.7 (d,  $J = 10.1$  Hz), 125.4, 124.7 (d,  $J = 3.5$  Hz), 123.8 (d,  $J = 3.7$  Hz), 123.1 (d,  $J = 12.4$  Hz), 116.7 (d,  $J = 22.5$  Hz), 116.1 (d,  $J = 21.8$  Hz), 78.9 ppm; HRMS (ESI)  $m/z$   $[\text{M} + \text{H}]^+$  calcd for  $\text{C}_{27}\text{H}_{20}\text{F}_2\text{N}_3^+$  424.1620, found: 424.1617.

#### 4,6-bis(3-fluorophenyl)-1,2-diphenyl-1,2-dihydro-1,3,5-triazine (5qa and 7oa)

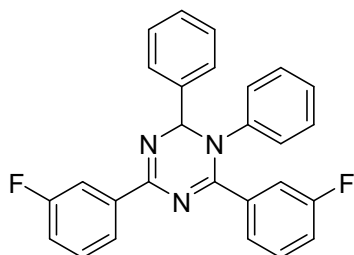

yellow solid (mp: 156–157 °C), (**5ra**: 47.4 mg, 56%; **7oa**: 26.3 mg, 62%);  $^1\text{H}$  NMR ( $\text{CDCl}_3$ , 400 MHz)  $\delta$  8.07 (d,  $J = 7.6$  Hz, 1H), 7.98 (d,  $J = 10.4$  Hz, 1H), 7.59 (d,  $J = 7.2$  Hz, 2H), 7.44 (t,  $J = 8.4$  Hz, 2H), 7.35–7.30 (m, 4H), 7.20–7.15 (m, 1H), 7.14–7.08 (m, 3H), 7.07 (d,  $J = 1.6$  Hz, 1H), 7.04–6.98 (m, 1H), 6.92 (d,  $J = 7.6$  Hz, 2H), 6.31 (s, 1H) ppm;  $^{13}\text{C}\{^1\text{H}\}$  NMR ( $\text{CDCl}_3$ , 100 MHz)  $\delta$  164.1 (d,  $J = 29.5$  Hz), 161.6 (d,  $J = 32.0$  Hz), 159.8 (d,  $J = 2.8$  Hz), 157.2 (d,  $J = 3.2$  Hz), 143.7, 141.5, 138.9 (d,  $J = 7.6$  Hz), 137.0 (d,  $J = 7.7$  Hz), 130.0 (d,  $J = 7.9$  Hz), 129.6 (d,  $J = 7.8$  Hz), 129.2, 129.1, 128.8, 126.5, 125.9 (d,  $J = 2.9$  Hz), 124.9, 123.8 (d,  $J = 2.8$  Hz), 118.5 (d,  $J = 21.2$  Hz), 117.5 (d,  $J = 59.7$  Hz), 117.3, 117.2, 115.1, 114.9, 78.8 ppm; HRMS (ESI)  $m/z$   $[\text{M} + \text{H}]^+$  calcd for  $\text{C}_{27}\text{H}_{20}\text{F}_2\text{N}_3^+$  424.1620, found: 424.1629.

#### 4,6-bis(4-fluorophenyl)-1,2-diphenyl-1,2-dihydro-1,3,5-triazine (5ra and 7pa)

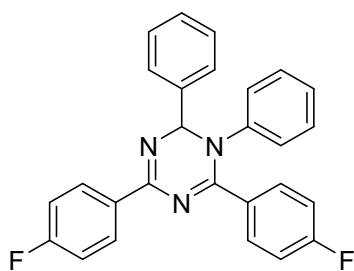

yellow solid (mp: 177–178 °C), (**5sa**: 65.5 mg, 78%; **7pa**: 30.9 mg, 73%);  $^1\text{H}$  NMR ( $\text{CDCl}_3$ , 400 MHz)  $\delta$  8.29–8.26 (m, 2H), 7.70–7.67 (m, 2H), 7.60 (d,  $J = 7.2$  Hz, 2H), 7.34–7.27 (m, 3H), 7.13 (t,  $J = 7.2$  Hz, 2H), 7.07–7.00 (m, 3H), 6.93–6.89 (m, 4H), 6.29 (s, 1H) ppm;  $^{13}\text{C}\{^1\text{H}\}$  NMR ( $\text{CDCl}_3$ , 100 MHz)  $\delta$  165.8 (d,  $J = 5.3$  Hz), 163.3 (d,  $J = 8.4$  Hz), 159.8, 157.4, 144.0, 141.7, 132.7 (d,  $J = 2.7$  Hz), 132.4 (d,  $J = 8.9$  Hz), 130.8 (d,  $J = 2.9$  Hz), 130.2 (d,  $J = 8.5$  Hz), 129.2, 129.0, 128.6, 126.2, 126.1, 124.9, 115.7 (d,  $J = 63.7$  Hz), 115.5 (d,  $J = 63.4$  Hz), 78.8 ppm; HRMS (ESI)  $m/z$   $[\text{M} + \text{H}]^+$  calcd for  $\text{C}_{27}\text{H}_{20}\text{F}_2\text{N}_3^+$  424.1620, found: 424.1611.

#### 4,6-di(naphthalen-1-yl)-1,2-diphenyl-1,2-dihydro-1,3,5-triazine (5sa)

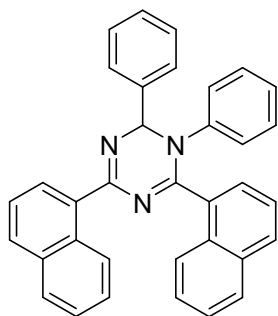

yellow solid (mp: 68–69 °C), (46.1 mg, 43%); **<sup>1</sup>H NMR** (CDCl<sub>3</sub>, 400 MHz) δ 8.91 (d, *J* = 8.0 Hz, 1H), 8.44 (d, *J* = 8.4 Hz, 1H), 8.22 (d, *J* = 7.2 Hz, 1H), 7.90 (d, *J* = 8.0 Hz, 1H), 7.85 (d, *J* = 7.6 Hz, 3H), 7.77–7.73 (m, 2H), 7.53–7.51 (m, 4H), 7.49–7.48 (m, 2H), 7.46–7.43 (m, 3H), 7.29 (t, *J* = 7.6 Hz, 1H), 7.01–6.96 (m, 5H), 6.55 (s, 1H) ppm; **<sup>13</sup>C{<sup>1</sup>H} NMR** (CDCl<sub>3</sub>, 100 MHz) δ 161.7, 160.6, 142.8, 142.4, 134.9, 134.1, 133.7, 132.4, 131.4, 130.5, 130.2, 129.3, 129.2, 128.8, 128.4, 128.3, 128.2, 128.1, 126.9, 126.8, 126.5, 126.2, 126.1, 125.6, 125.3, 125.0, 124.7, 79.7 ppm; **HRMS** (ESI) *m/z* [M + H]<sup>+</sup> calcd for C<sub>35</sub>H<sub>26</sub>N<sub>3</sub><sup>+</sup> 488.2121, found: 488.2127.

**4,6-di(naphthalen-2-yl)-1,2-diphenyl-1,2-dihydro-1,3,5-triazine (5ta)**

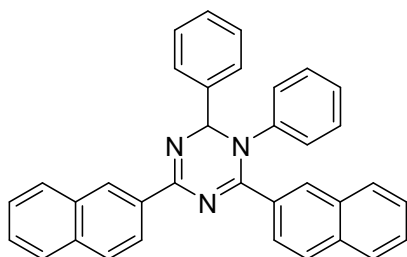

yellow solid (mp: 73–74 °C), (58.2 mg, 60%); **<sup>1</sup>H NMR** (CDCl<sub>3</sub>, 400 MHz) δ 8.92 (s, 1H), 8.41–8.35 (m, 2H), 7.94–7.92 (m, 1H), 7.83–7.76 (m, 3H), 7.72–7.68 (m, 4H), 7.65 (d, *J* = 8.4 Hz, 1H), 7.44–7.40 (m, 3H), 7.39–7.36 (m, 1H), 7.35 (t, *J* = 7.6 Hz, 2H), 7.28 (t, *J* = 6.8 Hz, 1H), 7.07 (t, *J* = 7.6 Hz, 2H), 6.99–6.96 (m, 3H), 6.42 (s, 1H) ppm; **<sup>13</sup>C{<sup>1</sup>H} NMR** (CDCl<sub>3</sub>, 100 MHz) δ 160.8, 160.5, 158.5, 144.3, 141.9, 134.7, 134.6, 134.1, 133.2, 132.8, 132.3, 131.4, 129.2, 129.1, 129.0, 128.9, 128.8, 128.6, 128.1, 127.8, 127.7, 126.9, 126.6, 126.3, 126.2, 126.1, 126.0, 125.9, 125.1, 124.9, 79.1 ppm; **HRMS** (ESI) *m/z* [M + H]<sup>+</sup> calcd for C<sub>35</sub>H<sub>26</sub>N<sub>3</sub><sup>+</sup> 488.2121, found: 488.2123.

**4,6-bis(2,4-dichlorophenyl)-1,2-diphenyl-1,2-dihydro-1,3,5-triazine (7qa)**

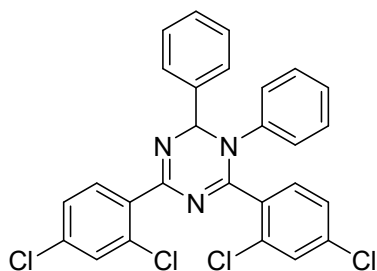

yellow oil (32.0 mg, 61%); **<sup>1</sup>H NMR** (CDCl<sub>3</sub>, 400 MHz) δ 7.66–7.61 (m, 3H), 7.43–7.41 (m, 4H), 7.38 (d, *J* = 8.3 Hz, 1H), 7.26–7.24 (m, 1H), 7.20 (d, *J* = 1.8 Hz,

1H), 7.14–7.12 (m, 4H), 7.00–6.95 (m, 2H), 6.33 (s, 1H) ppm;  $^{13}\text{C}\{^1\text{H}\}$  NMR ( $\text{CDCl}_3$ , 100 MHz)  $\delta$  160.0, 158.8, 141.3, 141.1, 136.3, 136.0, 135.2, 133.4, 133.4, 132.5, 131.7, 131.4, 130.0, 129.9, 129.4, 129.0, 128.9, 128.0, 127.3, 127.1, 127.0, 126.9, 80.2 ppm; HRMS (ESI)  $m/z$   $[\text{M} + \text{H}]^+$  calcd for  $\text{C}_{27}\text{H}_{18}\text{Cl}_4\text{N}_3^+$  526.0220, found: 526.0215.

## 6. Reference

- [1] X. Meng, X. Bi, Y. Wang, G. Chen, B. Chen, Z. Jing and P. Zhao, *Catal. Commun.*, 2017, **89**, 34.

## 7. Crystal structure of compound 3ia (CCDC 2224587)

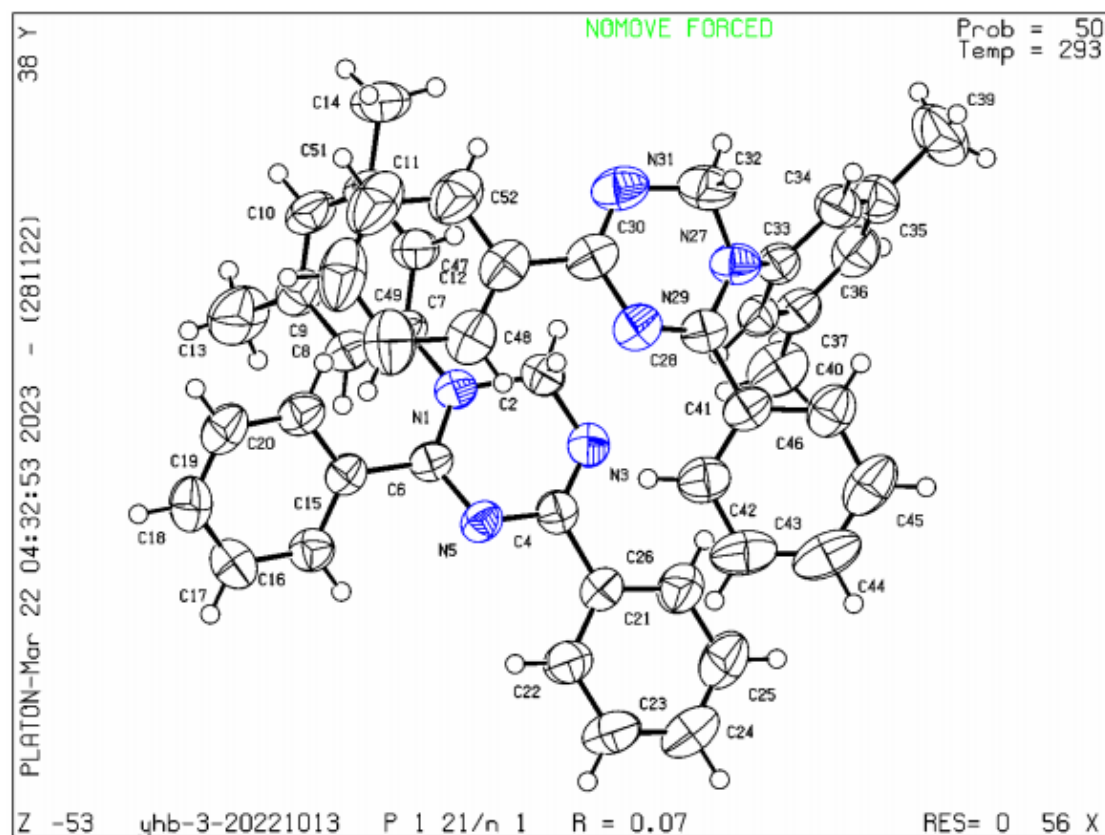

|                                    |                                                    |
|------------------------------------|----------------------------------------------------|
| CCDC number                        | 2224587                                            |
| Identification code                | <b>3ia</b>                                         |
| Moiety formula                     | 2(C <sub>23</sub> H <sub>21</sub> N <sub>3</sub> ) |
| Sum formula                        | C <sub>46</sub> H <sub>42</sub> N <sub>6</sub>     |
| Formula weight                     | 678.85                                             |
| Temperature/K                      | 293                                                |
| Crystal system                     | monoclinic                                         |
| Space group                        | P 1 21/n 1                                         |
| a,b,c (Å)                          | 9.5634(5), 33.8247(15), 12.5950(7)                 |
| α,β,γ (°)                          | 90, 111.385(6), 90                                 |
| Volume/Å <sup>3</sup>              | 3793.7(4)                                          |
| Z                                  | 4                                                  |
| ρ <sub>calc</sub> /cm <sup>3</sup> | 1.189                                              |
| μ/mm <sup>-1</sup>                 | 0.071                                              |
| F(000)                             | 1440.0                                             |
| Crystal size/mm <sup>3</sup>       | 0.21×0.18×0.16                                     |
| Radiation type                     | Mo Kα                                              |
| Radiation wavelength               | 0.71073                                            |
| Index ranges                       | -8 ≤ h ≤ 11, -26 ≤ k ≤ 42, -16 ≤ l ≤ 16            |
| Reflections collected              | 14633                                              |

|                                                |                                  |
|------------------------------------------------|----------------------------------|
| Independent reflections                        | 8234                             |
| Data/restraints/parameters                     | 8234/0/473                       |
| Goodness-of-fit on $F^2$                       | 1.047                            |
| Final R indexes [ $I > 2\sigma(I)$ ]           | $R_1 = 0.0702$ , $wR_2 = 0.1906$ |
| Final R indexes [all data]                     | $R_1 = 0.1084$ , $wR_2 = 0.2186$ |
| Largest diff. peak/hole / $e \text{ \AA}^{-3}$ | 0.197/-0.189                     |

## 8. Crystal structure of compound 7oa (CCDC 2224582)

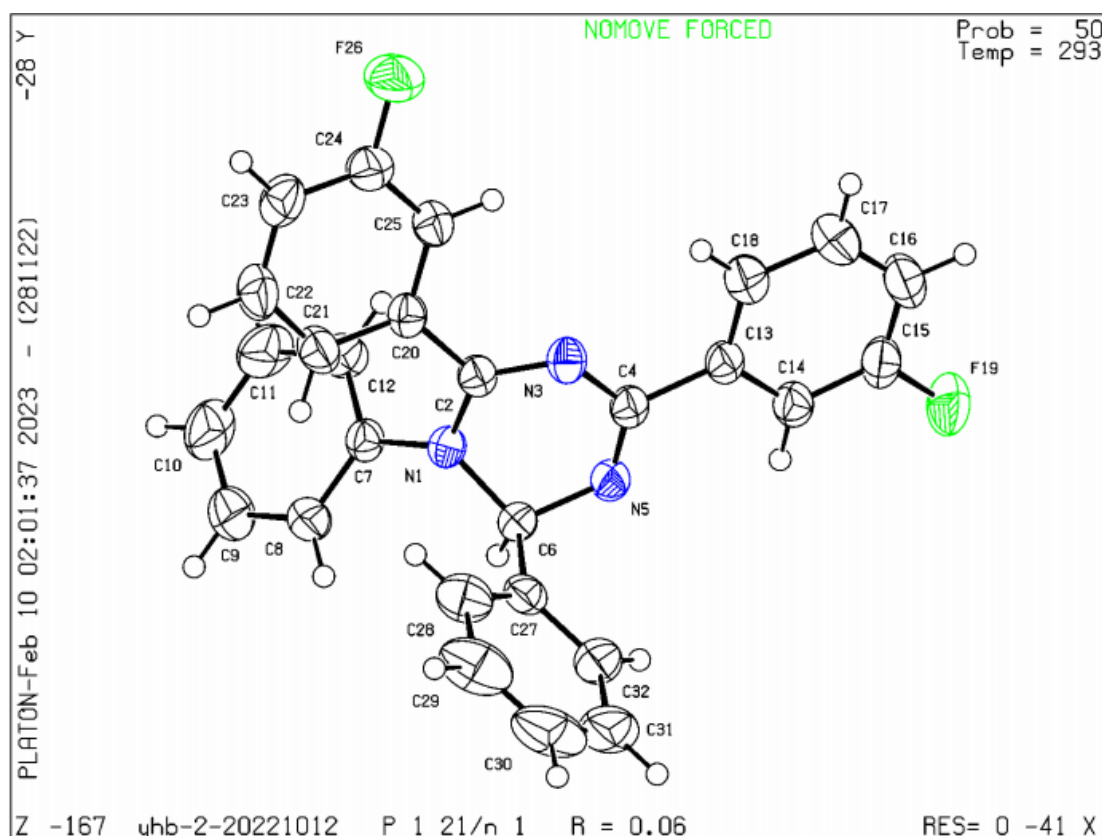

|                           |                                    |
|---------------------------|------------------------------------|
| CCDC number               | 2224582                            |
| Identification code       | <b>7oa</b>                         |
| Moiety formula            | $C_{27}H_{19}F_2N_3$               |
| Sum formula               | $C_{27}H_{19}F_2N_3$               |
| Formula weight            | 423.45                             |
| Temperature/K             | 293                                |
| Crystal system            | monoclinic                         |
| Space group               | P 1 21/n 1                         |
| a,b,c (Å)                 | 10.1865(2), 11.3004(2), 19.1635(4) |
| $\alpha,\beta,\gamma$ (°) | 90, 103.307(2), 90                 |
| Volume/Å <sup>3</sup>     | 2146.71(7)                         |

|                                                |                                                                   |
|------------------------------------------------|-------------------------------------------------------------------|
| Z                                              | 4                                                                 |
| $\rho_{\text{calc}}/\text{cm}^3$               | 1.310                                                             |
| $\mu/\text{mm}^{-1}$                           | 0.737                                                             |
| F(000)                                         | 880.0                                                             |
| Crystal size/ $\text{mm}^3$                    | 0.22×0.18×0.16                                                    |
| Radiation type                                 | Cu $K\alpha$                                                      |
| Radiation wavelength                           | 1.54184                                                           |
| Index ranges                                   | $-9 \leq h \leq 12$ , $-13 \leq k \leq 13$ , $-23 \leq l \leq 20$ |
| Reflections collected                          | 10518                                                             |
| Independent reflections                        | 4088                                                              |
| Data/restraints/parameters                     | 4088/0/289                                                        |
| Goodness-of-fit on $F^2$                       | 1.094                                                             |
| Final R indexes [ $I \geq 2\sigma(I)$ ]        | $R_1 = 0.0577$ , $wR_2 = 0.1510$                                  |
| Final R indexes [all data]                     | $R_1 = 0.0637$ , $wR_2 = 0.1572$                                  |
| Largest diff. peak/hole / $e \text{ \AA}^{-3}$ | 0.254/-0.413                                                      |

## 9. <sup>1</sup>H NMR and <sup>13</sup>C NMR for products 3

3aa

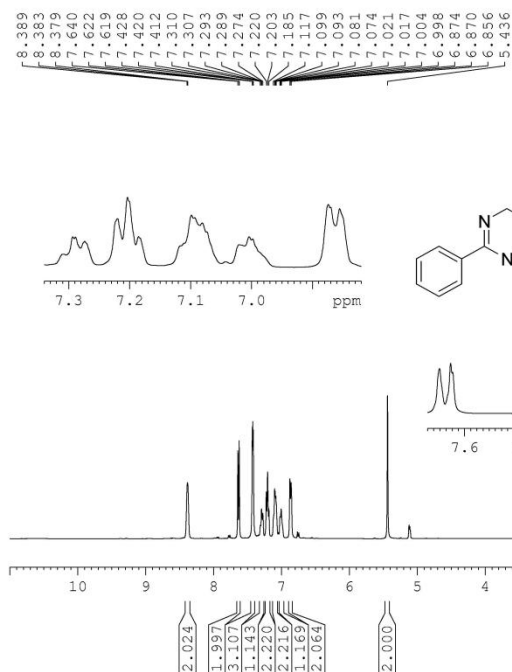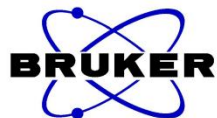

```

NAME      2019-03-08 tyut-lx-0
EXPNO     10
PROCNO    1
Date_     20190308
Time      18.04
INSTRUM   spect
PROBHD    5 mm PABBO BB/
PULPROG   zg30
TD         65536
SOLVENT   CDCl3
NS         16
DS         2
SWH        8012.820 Hz
FIDRES     0.122266 Hz
AQ         4.0894966 sec
RG         10
DW         62.400 usec
DE         6.50 usec
TE         295.9 K
D1         1.00000000 sec
TD0        1
    
```

```

===== CHANNEL f1 =====
SF01     400.1324710 MHz
NUC1      1H
P1        9.59 usec
SI        65536
SF        400.1300370 MHz
WDW       EM
SSB       0
LB        0.30 Hz
GB        0
PC        1.00
    
```

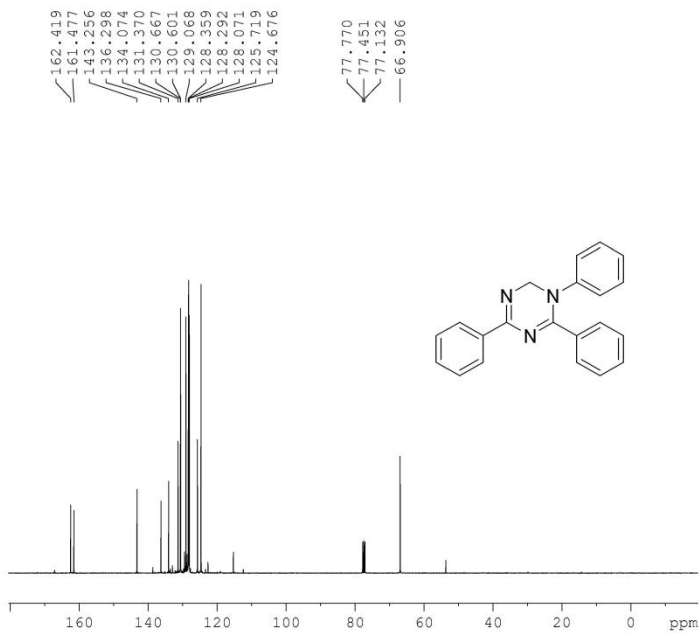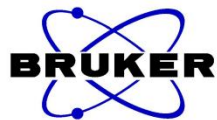

```

NAME      2019-03-08 tyut-lx-0
EXPNO     10
PROCNO    1
Date_     20190312
Time      4.49
INSTRUM   spect
PROBHD    5 mm PABBO BB/
PULPROG   zgpg30
TD         65536
SOLVENT   CDCl3
NS         1024
DS         4
SWH        24038.461 Hz
FIDRES     0.366798 Hz
AQ         1.3631988 sec
RG         185.43
DW         20.800 usec
DE         6.50 usec
TE         297.4 K
D1         2.00000000 sec
D11        0.03000000 sec
TD0        1
    
```

```

===== CHANNEL f1 =====
SF01     100.6228293 MHz
NUC1     13C
P1       10.27 usec
SI       32768
SF       100.6127690 MHz
WDW       EM
SSB       0
LB        1.00 Hz
GB        0
PC        1.40
    
```





### 3ca

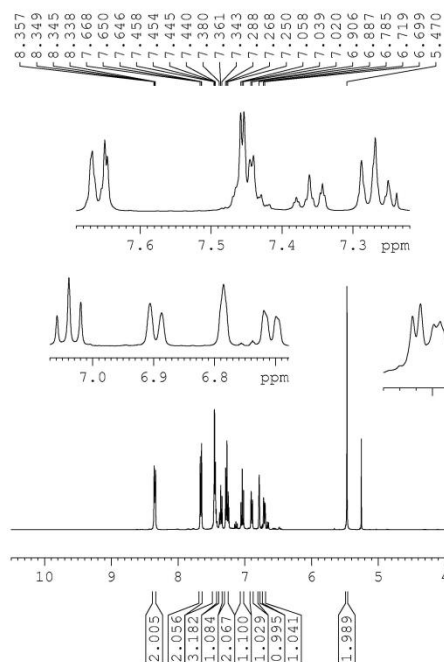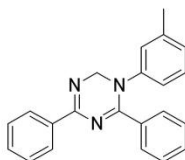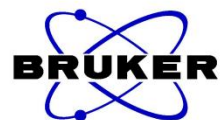

```

NAME      2019-01-14 tyut-lx-0
EXPNO     10
PROCNO    1
Date_     20190114
Time      22.20
INSTRUM   spect
PROBHD    5 mm PABBO BB/
PULPROG   zg30
TD         65536
SOLVENT   CDCl3
NS         16
DS         2
SWH       8012.820 Hz
FIDRES    0.122266 Hz
AQ        4.0894966 sec
RG         34.32
DW        62.400 usec
DE         6.50 usec
TE        293.6 K
D1        1.00000000 sec
TD0       1

===== CHANNEL f1 =====
SF01     400.1324710 MHz
NUC1     1H
P1       9.59 usec
SI       65536
SF       400.1300186 MHz
WDW      EM
SSB      0
LB       0.30 Hz
GB       0
PC       1.00
    
```

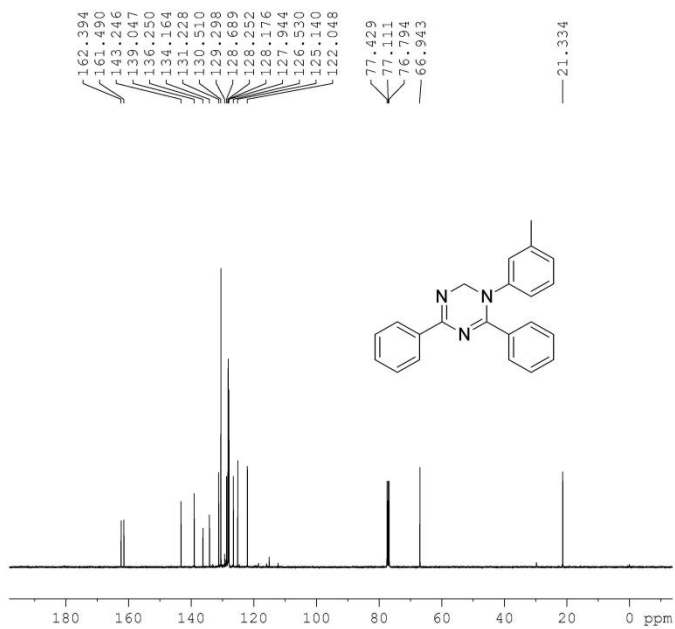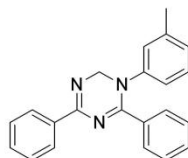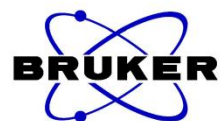

```

NAME      2019-02-28 tyut-05
EXPNO     10
PROCNO    1
Date_     20190301
Time      1.01
INSTRUM   spect
PROBHD    5 mm PABBO BB/
PULPROG   zgpg30
TD         65536
SOLVENT   CDCl3
NS         1024
DS         4
SWH       24038.461 Hz
FIDRES    0.366798 Hz
AQ        1.3631988 sec
RG        185.43
DW        20.800 usec
DE         6.50 usec
TE        300.3 K
D1        2.00000000 sec
D11       0.03000000 sec
TD0       1

===== CHANNEL f1 =====
SF01     100.6228293 MHz
NUC1     13C
P1       10.27 usec
SI       32768
SF       100.6127690 MHz
WDW      EM
SSB      0
LB       1.00 Hz
GB       0
PC       1.40
    
```

3da

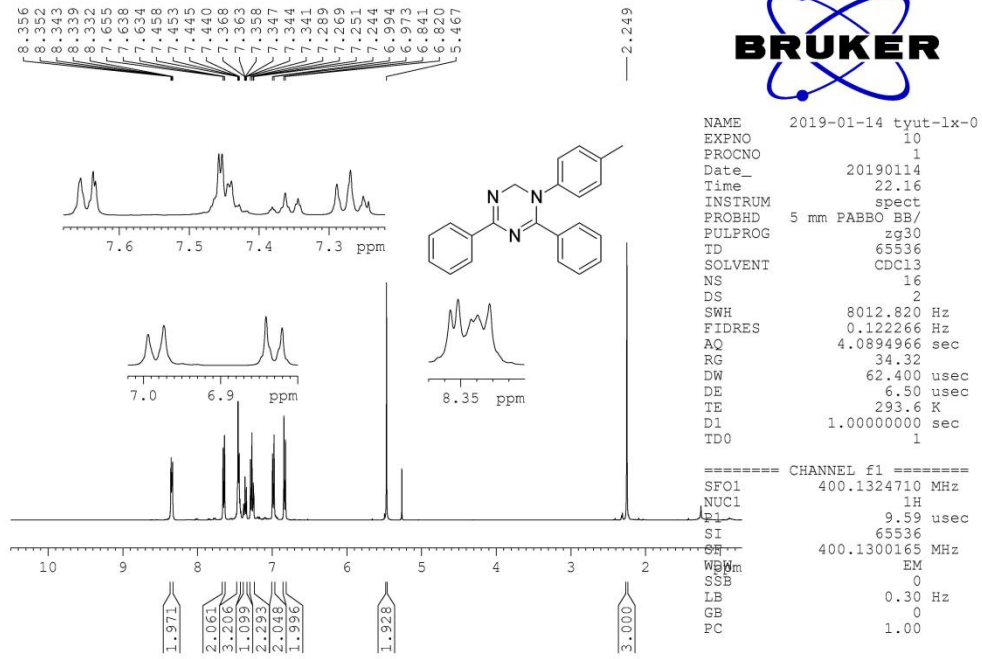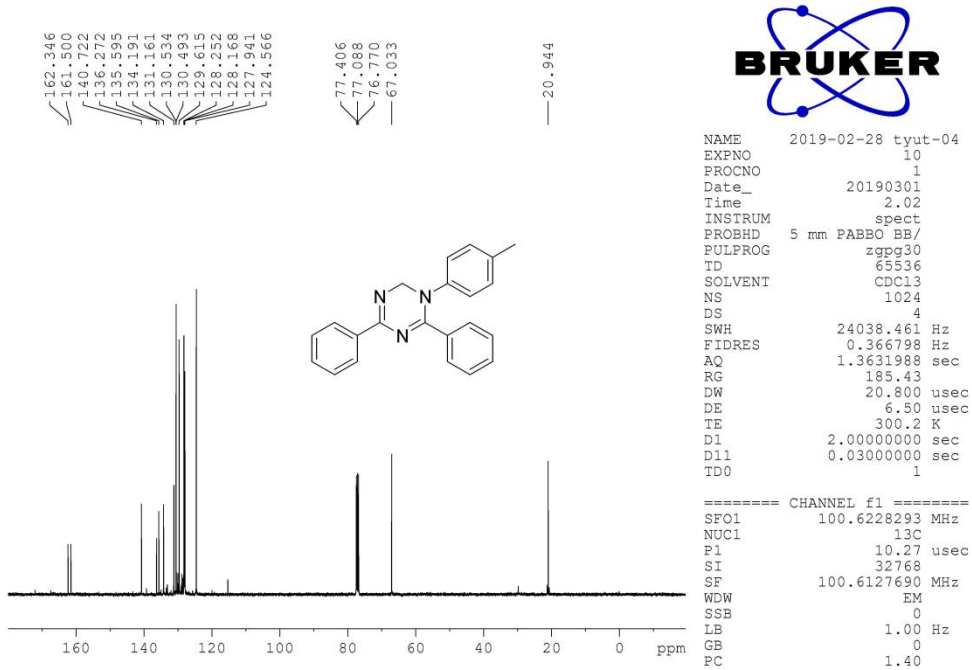

3ea

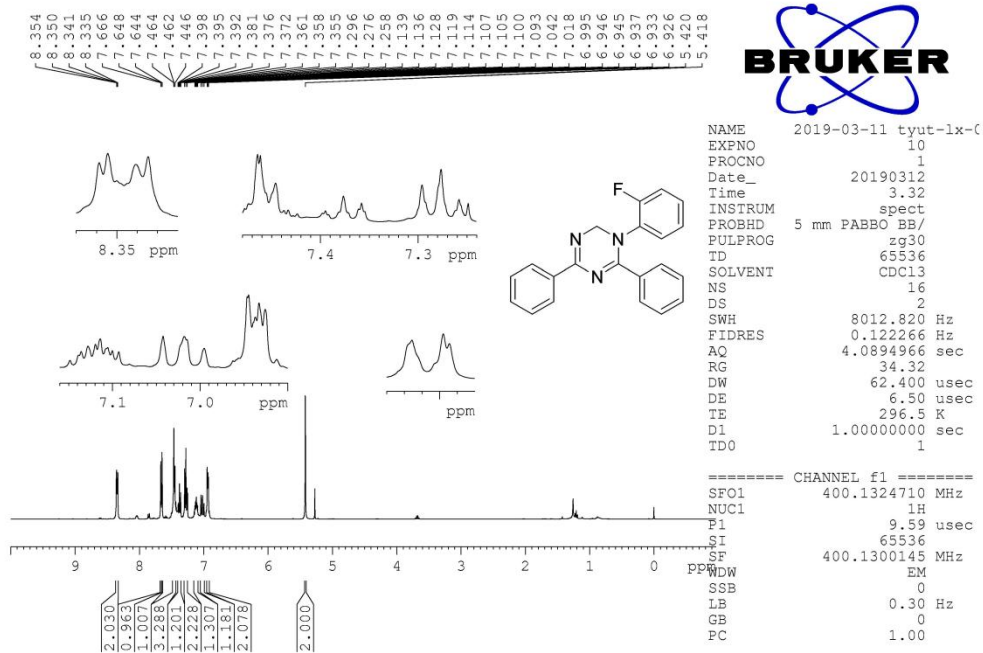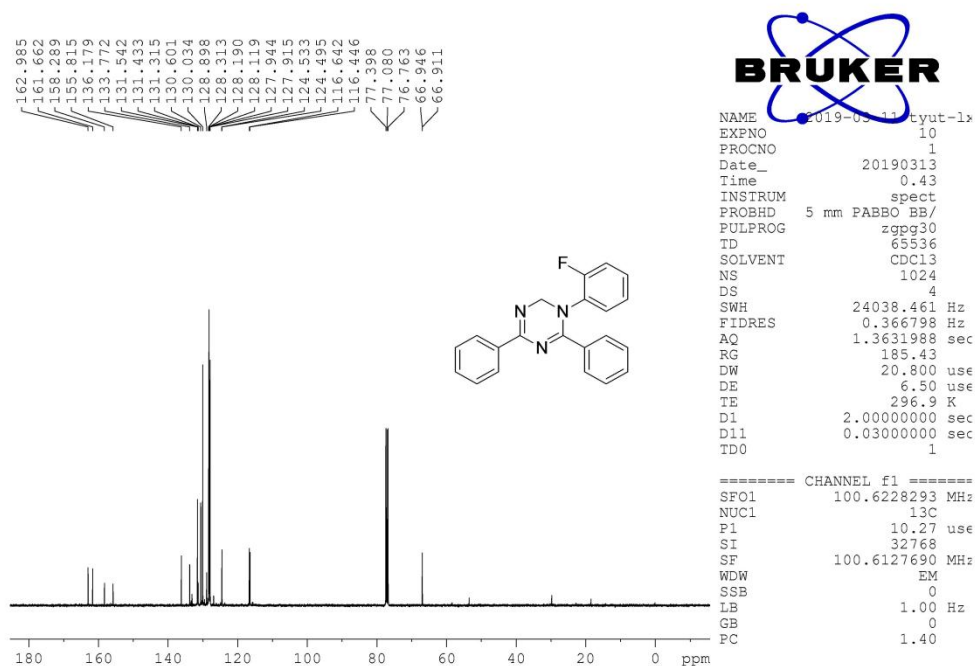

### 3fa

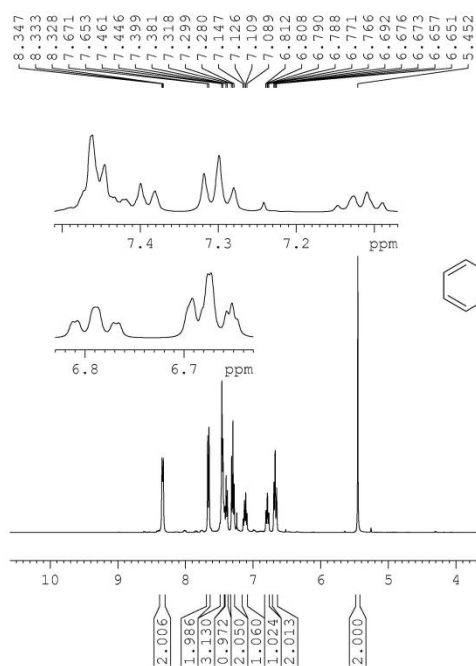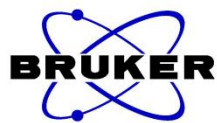

```

NAME      2019-03-08 tyut-lx-0
EXPNO    10
PROCNO   1
Date_    20190308
Time     18.12
INSTRUM  spect
PROBHD   5 mm PABBO BB/
PULPROG  zg30
TD       65536
SOLVENT  CDCl3
NS       16
DS       2
SWH      8012.820 Hz
FIDRES   0.122266 Hz
AQ       4.0894966 sec
RG       34.32
DW       62.400 usec
DE       6.50 usec
TE       296.0 K
D1       1.00000000 sec
TD0      1
  
```

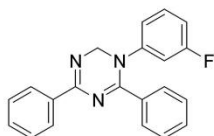

```

===== CHANNEL f1 =====
SF01   400.1324710 MHz
NUC1    1H
P1      9.59 usec
SI     65536
SF     400.1300176 MHz
WDW    EM
SSB    0
LB     0.30 Hz
GB     0
PC     1.00
  
```

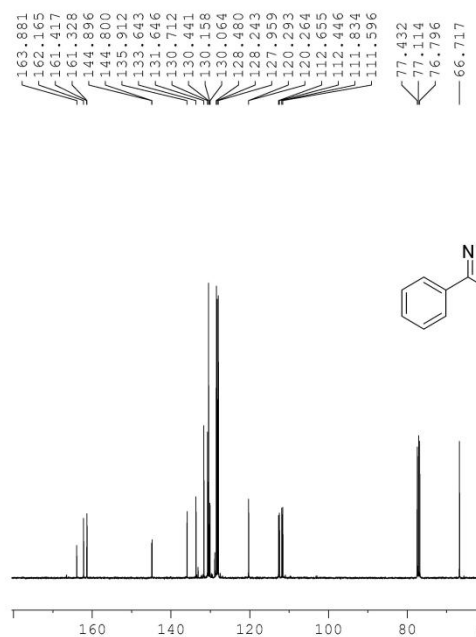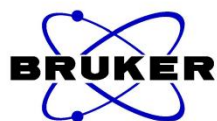

```

NAME      2019-03-08 tyut-lx
EXPNO    10
PROCNO   1
Date_    20190312
Time     6.52
INSTRUM  spect
PROBHD   5 mm PABBO BB/
PULPROG  zgpg30
TD       65536
SOLVENT  CDCl3
NS       1024
DS       4
SWH      24038.461 Hz
FIDRES   0.366798 Hz
AQ       1.3631988 sec
RG       185.43
DW       20.800 usec
DE       6.50 usec
TE       297.3 K
D1       2.00000000 sec
D11      0.03000000 sec
TD0      1
  
```

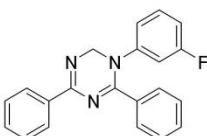

```

===== CHANNEL f1 =====
SF01   100.6228293 MHz
NUC1   13C
P1     10.27 usec
SI     32768
SF     100.6127690 MHz
WDW    EM
SSB    0
LB     1.00 Hz
GB     0
PC     1.40
  
```

### 3ga

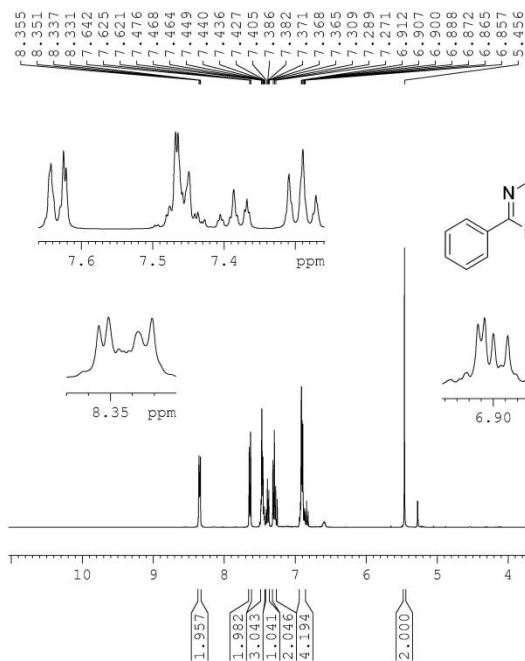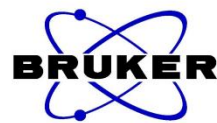

```

NAME      2019-01-14 tyut-lx-0
EXPNO    10
PROCNO   1
Date_    20190114
Time     22.28
INSTRUM  spect
PROBHD   5 mm PABBO BB/
PULPROG  zg30
TD       65536
SOLVENT  CDCl3
NS       16
DS       2
SWH      8012.820 Hz
FIDRES   0.122266 Hz
AQ       4.0894966 sec
RG       34.32
DW       62.400 usec
DE       6.50 usec
TE       293.6 K
D1       1.00000000 sec
TD0      1

===== CHANNEL f1 =====
SFO1    400.1324710 MHz
NUC1     1H
P1      9.59 usec
SI      65536
SF      400.1300143 MHz
WDW     EM
SSB     0
LB      0.30 Hz
GB      0
PC      1.00
    
```

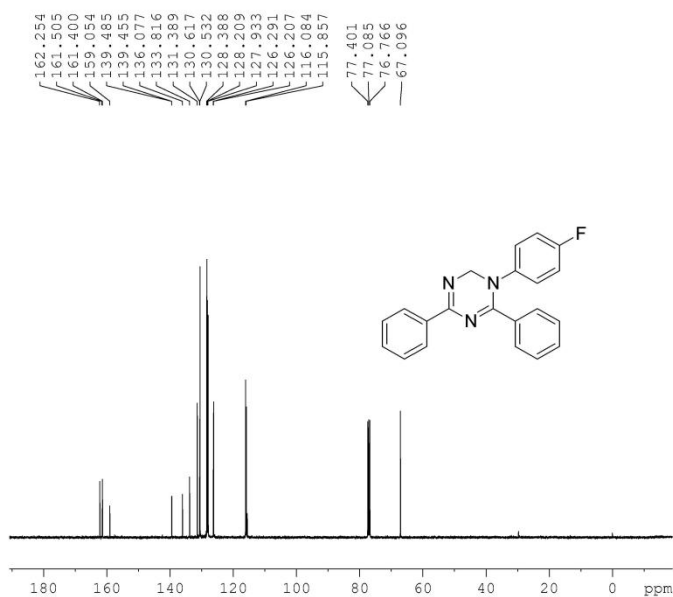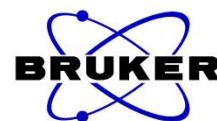

```

NAME      2019-02-28 tyut-07
EXPNO    10
PROCNO   1
Date_    20190228
Time     22.59
INSTRUM  spect
PROBHD   5 mm PABBO BB/
PULPROG  zgpg30
TD       65536
SOLVENT  CDCl3
NS       1024
DS       4
SWH      24038.461 Hz
FIDRES   0.366798 Hz
AQ       1.3631988 sec
RG       185.43
DW       20.800 usec
DE       6.50 usec
TE       300.3 K
D1       2.00000000 sec
D11     0.03000000 sec
TD0      1

===== CHANNEL f1 =====
SFO1    100.6228293 MHz
NUC1     13C
P1      10.27 usec
SI      32768
SF      100.6127690 MHz
WDW     EM
SSB     0
LB      1.00 Hz
GB      0
PC      1.40
    
```

3ha

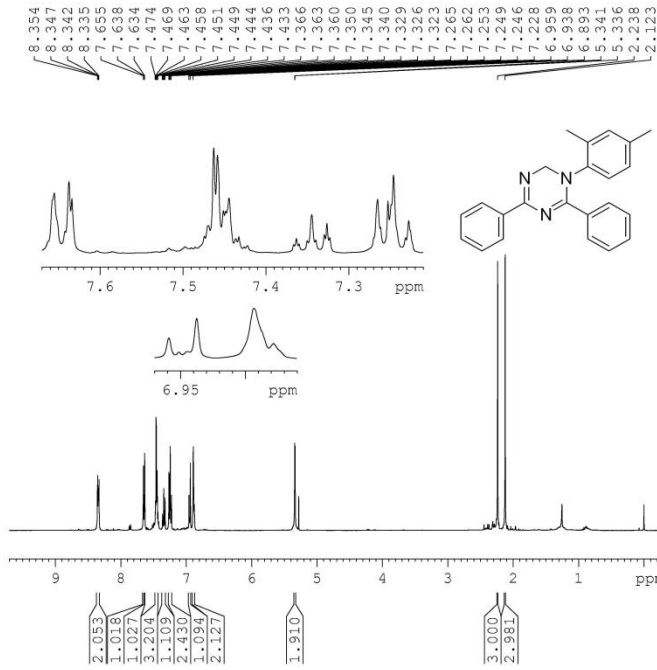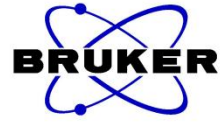

```

NAME      2019-03-11 tyut-lx-0
EXPNO    10
PROCNO   1
Date_    20190312
Time     3.36
INSTRUM  spect
PROBHD   5 mm PABBO BB/
PULPROG  zg30
TD        65536
SOLVENT  CDCl3
NS        16
DS        2
SWH      8012.820 Hz
FIDRES   0.122266 Hz
AQ        4.0894966 sec
RG        57.76
DW        62.400 usec
DE        6.50 usec
TE        296.4 K
D1        1.00000000 sec
TD0       1

===== CHANNEL f1 =====
SF01    400.1324710 MHz
NUC1     1H
P1       9.59 usec
SI       65536
SF       400.1300130 MHz
WDW      EM
SSB      0
LB       0.30 Hz
GB       0
PC       1.00
    
```

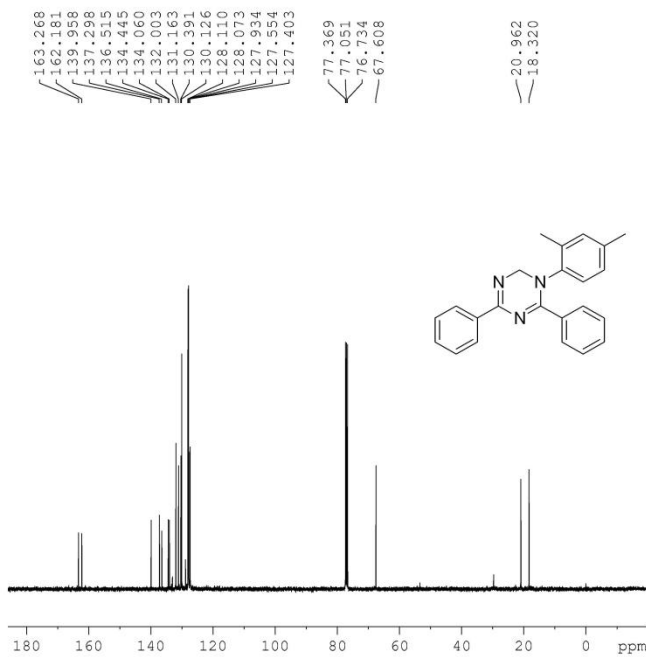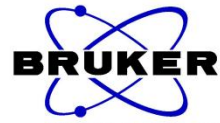

```

NAME      2019-03-11 tyut-lx-C-0
EXPNO    10
PROCNO   1
Date_    20190313
Time     1.44
INSTRUM  spect
PROBHD   5 mm PABBO BB/
PULPROG  zgpg30
TD        65536
SOLVENT  CDCl3
NS        1024
DS        4
SWH      24038.461 Hz
FIDRES   0.366798 Hz
AQ        1.3631988 sec
RG        185.43
DW        20.800 usec
DE        6.50 usec
TE        296.8 K
D1        2.00000000 sec
D11       0.03000000 sec
TD0       1

===== CHANNEL f1 =====
SF01    100.6228293 MHz
NUC1    13C
P1       10.27 usec
SI       32768
SF       100.6127690 MHz
WDW      EM
SSB      0
LB       1.00 Hz
GB       0
PC       1.40
    
```

### 3ia

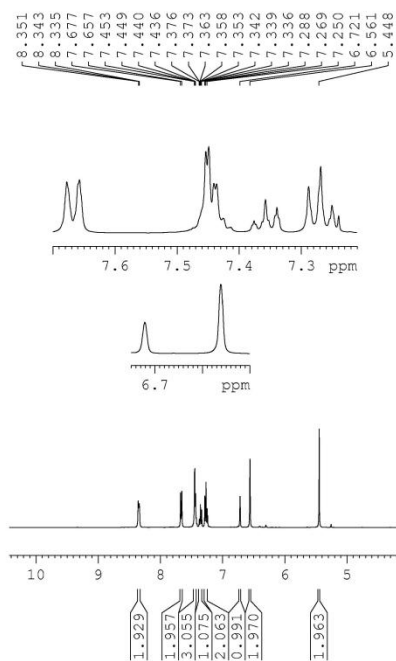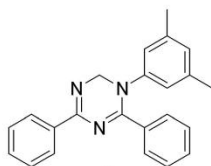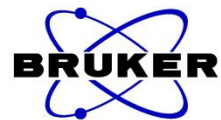

```

NAME      2019-03-13 tyut-lx-c
EXPNO    10
PROCNO   1
Date_    20190314
Time     2.11
INSTRUM  spect
PROBHD   5 mm PABBO BB/
PULPROG  zg30
TD       65536
SOLVENT  CDCl3
NS       16
DS       2
SWH      8012.820 Hz
FIDRES   0.122266 Hz
AQ       4.0894966 sec
RG       34.32
DW       62.400 usec
DE       6.50 usec
TE       295.6 K
D1       1.00000000 sec
TD0      1

===== CHANNEL f1 =====
SFO1     400.1324710 MHz
NUC1     1H
P1       9.59 usec
SI       65536
SF       400.1300181 MHz
WDW      EM
SSB      0
LB       0.30 Hz
GB       0
PC       1.00
    
```

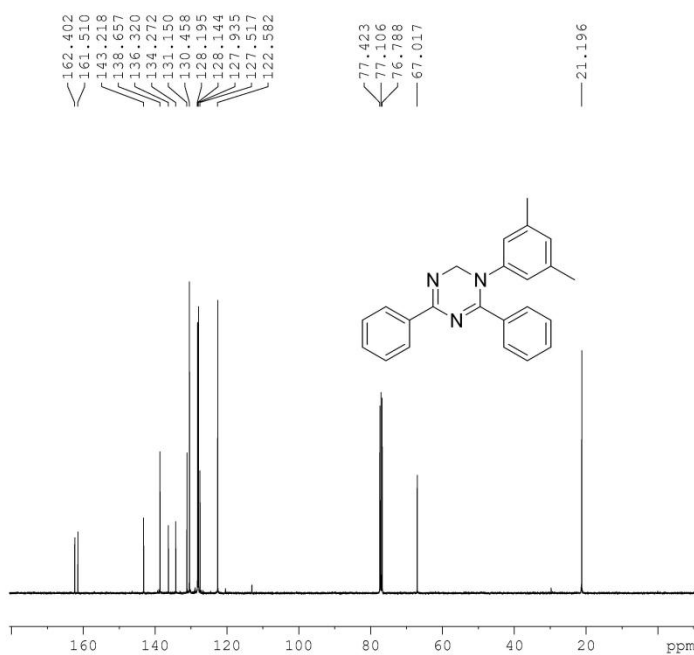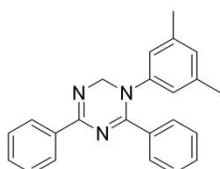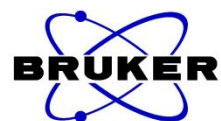

```

NAME      2019-03-13 tyut-lx-c
EXPNO    10
PROCNO   1
Date_    20190315
Time     10.38
INSTRUM  spect
PROBHD   5 mm PABBO BB/
PULPROG  zgpg30
TD       65536
SOLVENT  CDCl3
NS       1024
DS       4
SWH      24038.461 Hz
FIDRES   0.366798 Hz
AQ       1.3631988 sec
RG       185.43
DW       20.800 usec
DE       6.50 usec
TE       296.2 K
D1       2.00000000 sec
D11      0.03000000 sec
TD0      1

===== CHANNEL f1 =====
SFO1     100.6228293 MHz
NUC1     13C
P1       10.27 usec
SI       32768
SF       100.6127690 MHz
WDW      EM
SSB      0
LB       1.00 Hz
GB       0
PC       1.40
    
```

### 3ja

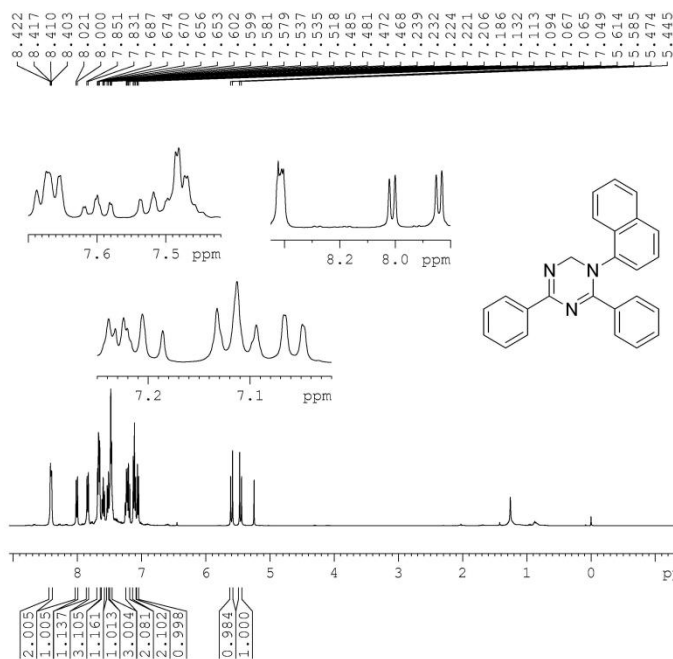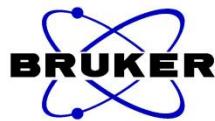

```

NAME      2019-03-08 tyut-lx-0
EXPNO    10
PROCNO   1
Date_    20190308
Time     18.16
INSTRUM  spect
PROBHD   5 mm PABBO BB/
PULPROG  zg30
TD       65536
SOLVENT  CDCl3
NS       16
DS       2
SWH      8012.820 Hz
FIDRES   0.122266 Hz
AQ       4.0894966 sec
RG       34.32
DW       62.400 usec
DE       6.50 usec
TE       296.0 K
D1       1.00000000 sec
TD0      1
  
```

```

===== CHANNEL f1 =====
SFO1    400.1324710 MHz
NUC1    1H
P1      9.59 usec
SI      65536
SF      400.1300212 MHz
WDW     EM
SSB     0
LB      0.30 Hz
GB      0
PC      1.00
  
```

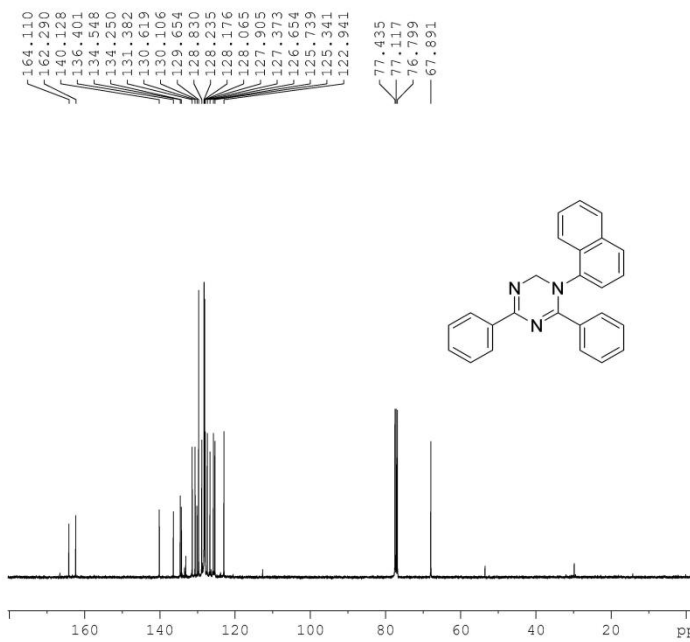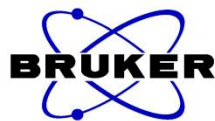

```

NAME      2019-03-08 tyut-lx-0
EXPNO    10
PROCNO   1
Date_    20190312
Time     7.53
INSTRUM  spect
PROBHD   5 mm PABBO BB/
PULPROG  zgpgg30
TD       65536
SOLVENT  CDCl3
NS       1024
DS       4
SWH      24038.461 Hz
FIDRES   0.366798 Hz
AQ       1.3631988 sec
RG       185.43
DW       20.800 usec
DE       6.50 usec
TE       297.3 K
D1       2.00000000 sec
D11      0.03000000 sec
TD0      1
  
```

```

===== CHANNEL f1 =====
SFO1    100.6228293 MHz
NUC1    13C
P1     10.27 usec
SI     32768
SF     100.6127690 MHz
WDW     EM
SSB     0
LB      1.00 Hz
GB      0
PC      1.40
  
```



3ka

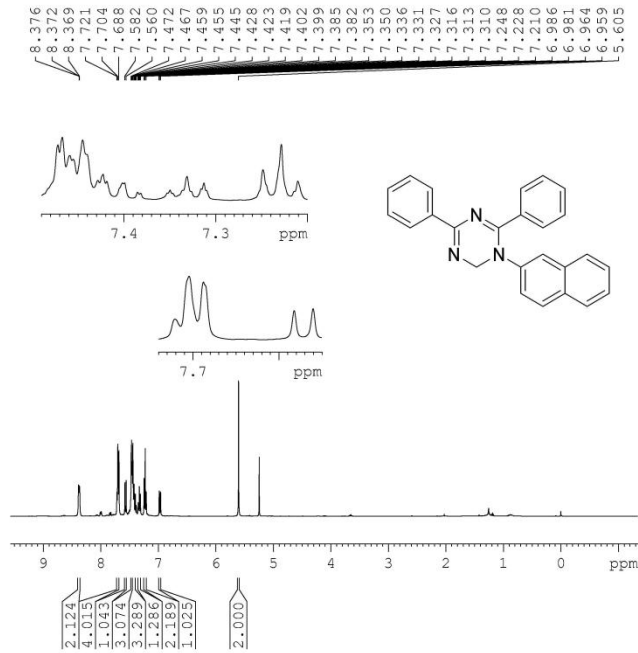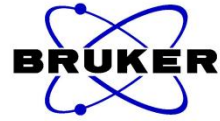

```

NAME      2019-03-11 tyut-lx-0
EXPNO     10
PROCNO    1
Date_     20190312
Time      3.43
INSTRUM   spect
PROBHD    5 mm PABBO BB/
PULPROG   zg30
TD         65536
SOLVENT   CDCl3
NS         16
DS         2
SWH        8012.820 Hz
FIDRES     0.122266 Hz
AQ         4.0894966 sec
RG         34.32
DW         62.400 usec
DE         6.50 usec
TE         296.4 K
D1         1.00000000 sec
TD0        1
    
```

```

===== CHANNEL f1 =====
SF01     400.1324710 MHz
NUC1      1H
P1        9.59 usec
SI        65536
SF        400.1300228 MHz
WDW       EM
SSB       0
LB        0.30 Hz
GB        0
PC        1.00
    
```

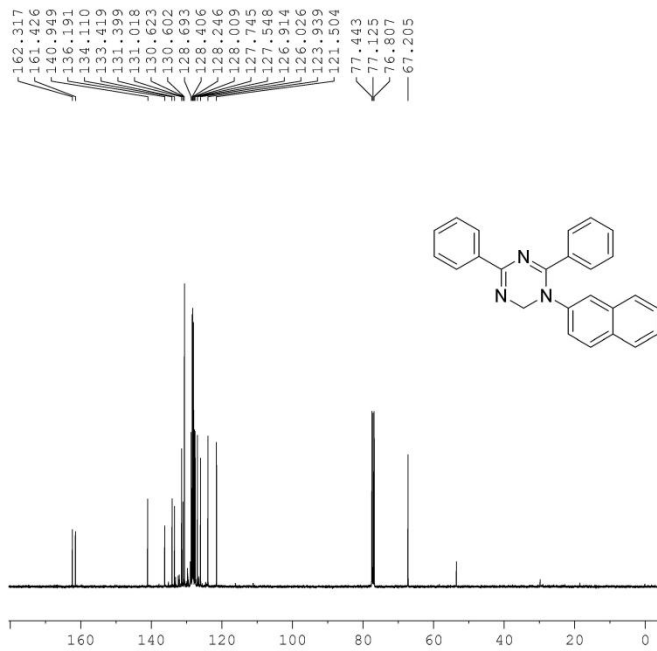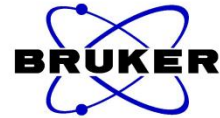

```

NAME      2019-03-11 tyut-lx-c
EXPNO     10
PROCNO    1
Date_     20190313
Time      3.46
INSTRUM   spect
PROBHD    5 mm PABBO BB/
PULPROG   zgpg30
TD         65536
SOLVENT   CDCl3
NS         1024
DS         4
SWH        24038.461 Hz
FIDRES     0.366798 Hz
AQ         1.3631988 sec
RG         185.43
DW         20.800 usec
DE         6.50 usec
TE         296.7 K
D1         2.00000000 sec
D11        0.03000000 sec
TD0        1
    
```

```

===== CHANNEL f1 =====
SF01     100.6228293 MHz
NUC1      13C
P1        10.27 usec
SI        32768
SF        100.6127690 MHz
WDW       EM
SSB       0
LB        1.00 Hz
GB        0
PC        1.40
    
```



3na

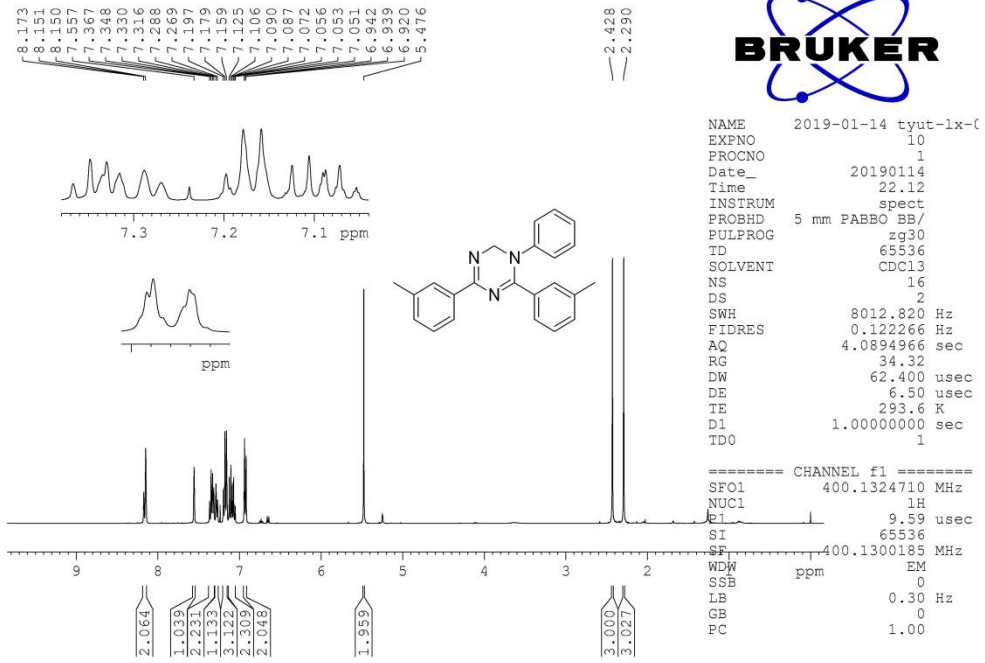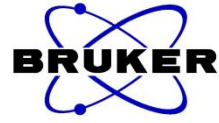

NAME 2019-01-14 tyut-lx-(  
EXPNO 10  
PROCNO 1  
Date\_ 20190114  
Time 22.12  
INSTRUM spect  
PROBHD 5 mm PABBO BB/  
PULPROG zg30  
TD 65536  
SOLVENT CDC13  
NS 16  
DS 2  
SWH 8012.820 Hz  
FIDRES 0.122266 Hz  
AQ 4.0894966 sec  
RG 34.32  
DW 62.400 usec  
DE 6.50 usec  
TE 293.6 K  
D1 1.00000000 sec  
TD0 1

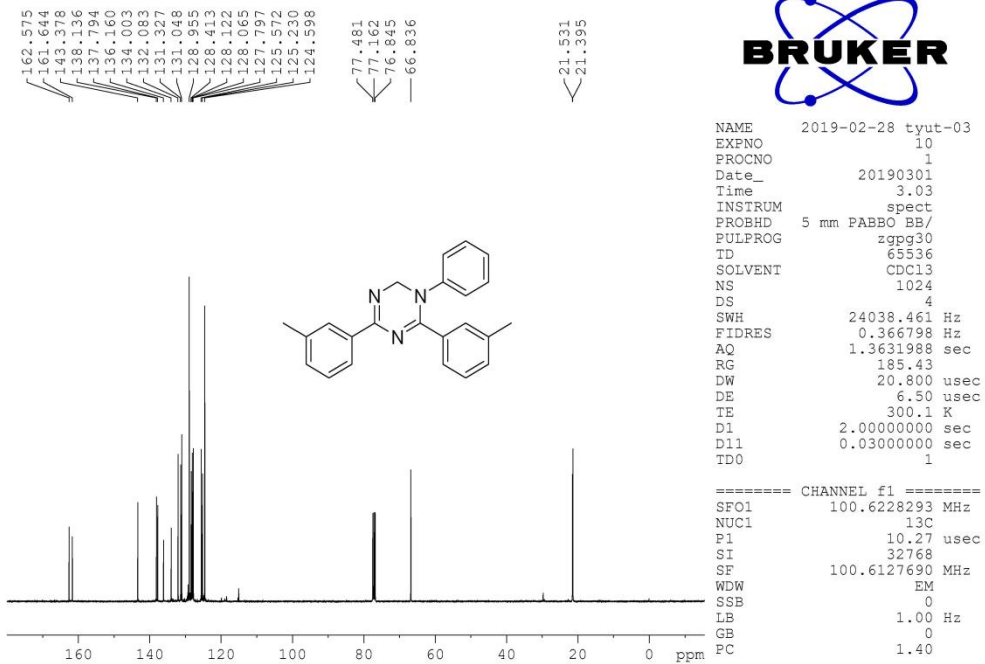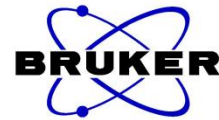

NAME 2019-02-28 tyut-03  
EXPNO 10  
PROCNO 1  
Date\_ 20190301  
Time 3.03  
INSTRUM spect  
PROBHD 5 mm PABBO BB/  
PULPROG zgpg30  
TD 65536  
SOLVENT CDC13  
NS 1024  
DS 4  
SWH 24038.461 Hz  
FIDRES 0.366798 Hz  
AQ 1.3631988 sec  
RG 185.43  
DW 20.800 usec  
DE 6.50 usec  
TE 300.1 K  
D1 2.00000000 sec  
D11 0.03000000 sec  
TD0 1

### 30a

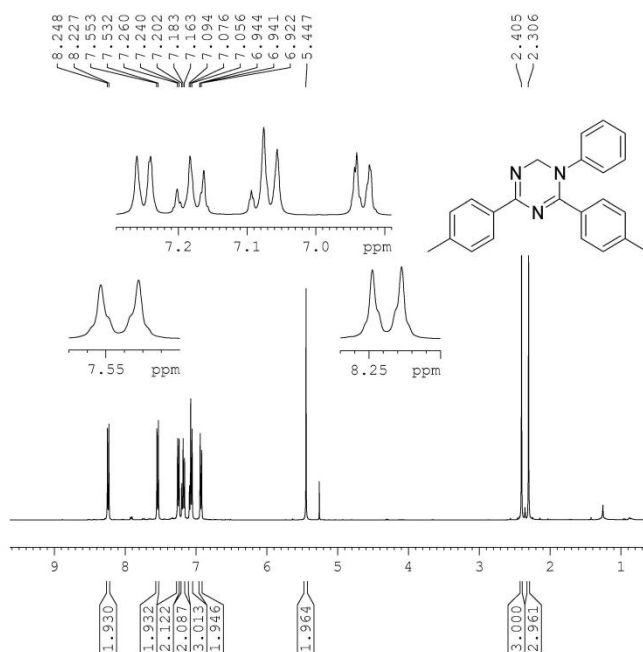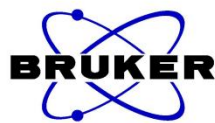

```

NAME      2019-01-14 tyut-lx-
EXPNO     10
PROCNO    1
Date_     20190114
Time      22.24
INSTRUM   spect
PROBHD    5 mm PABBO BB/
PULPROG   zg30
TD         65536
SOLVENT   CDCl3
NS         16
DS         2
SWH       8012.820 Hz
FIDRES    0.122266 Hz
AQ         4.0894966 sec
RG         34.32
DW         62.400 usec
DE         6.50 usec
TE         293.6 K
D1         1.00000000 sec
TD0        1

===== CHANNEL f1 =====
SFO1      400.1324710 MHz
NUC1       1H
P1         9.59 usec
SI         65536
SF         400.1300167 MHz
WDW        EM
SSB         0
LB         0.30 Hz
GB         0
PC         1.00
    
```

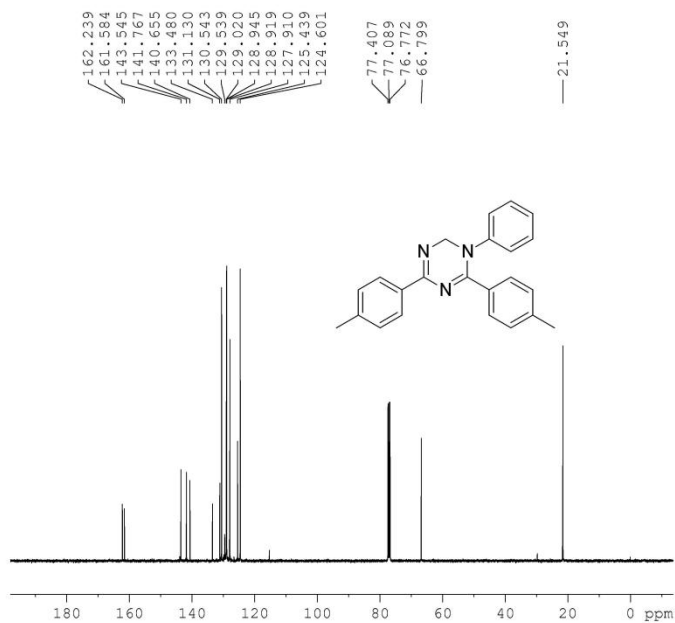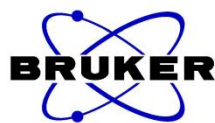

```

NAME      2019-02-28 tyut-06
EXPNO     10
PROCNO    1
Date_     20190301
Time      0.00
INSTRUM   spect
PROBHD    5 mm PABBO BB/
PULPROG   zgpg30
TD         65536
SOLVENT   CDCl3
NS         1024
DS         4
SWH       24038.461 Hz
FIDRES    0.366798 Hz
AQ         1.3631988 sec
RG         185.43
DW         20.800 usec
DE         6.50 usec
TE         300.3 K
D1         2.00000000 sec
D11        0.03000000 sec
TD0        1

===== CHANNEL f1 =====
SFO1      100.6228293 MHz
NUC1      13C
P1         10.27 usec
SI         32768
SF         100.6127690 MHz
WDW        EM
SSB         0
LB         1.00 Hz
GB         0
PC         1.40
    
```

3pa

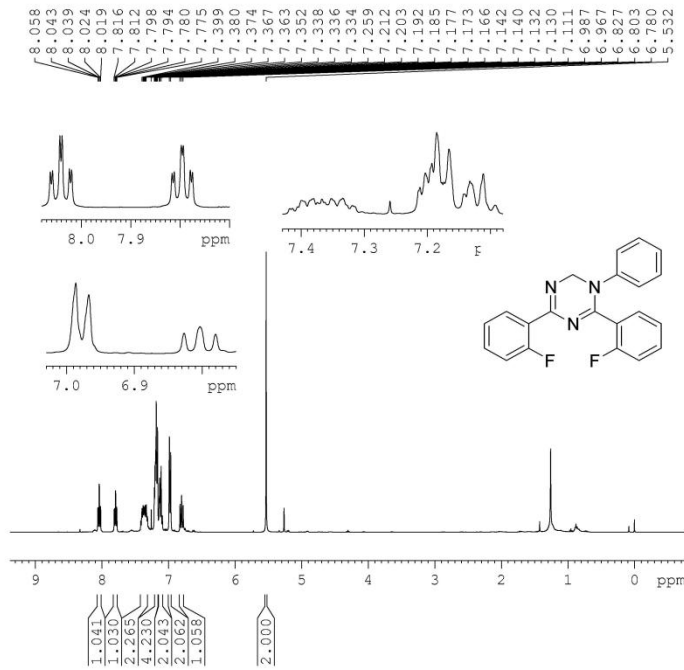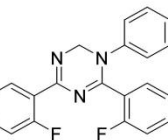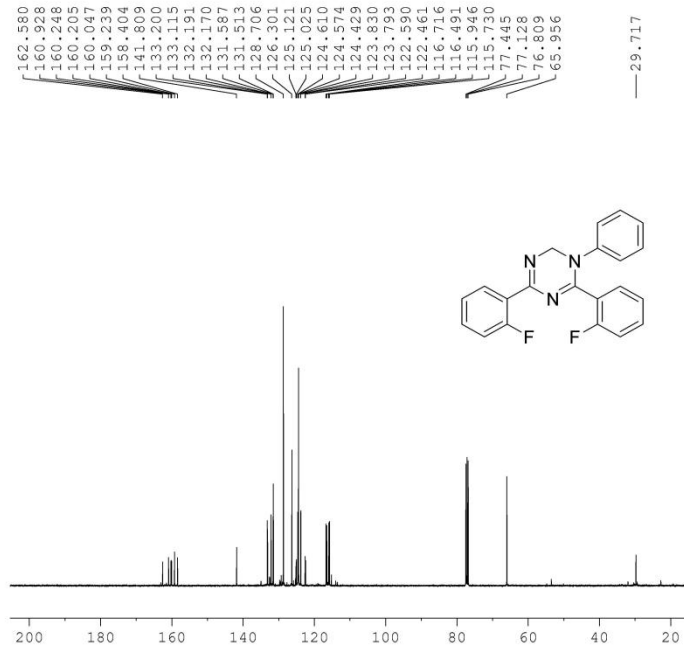

### 3qa

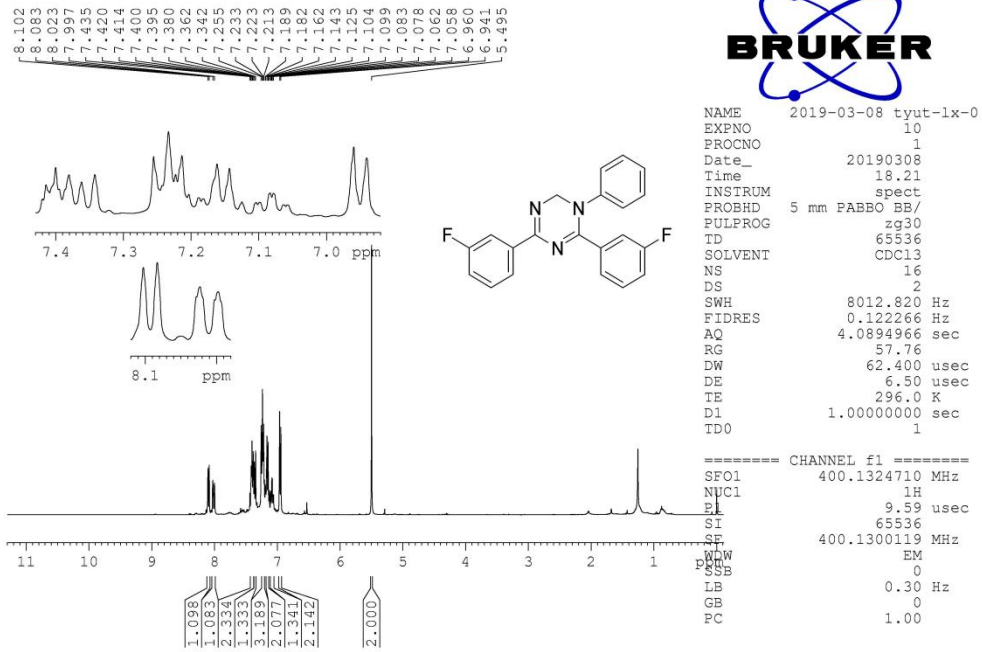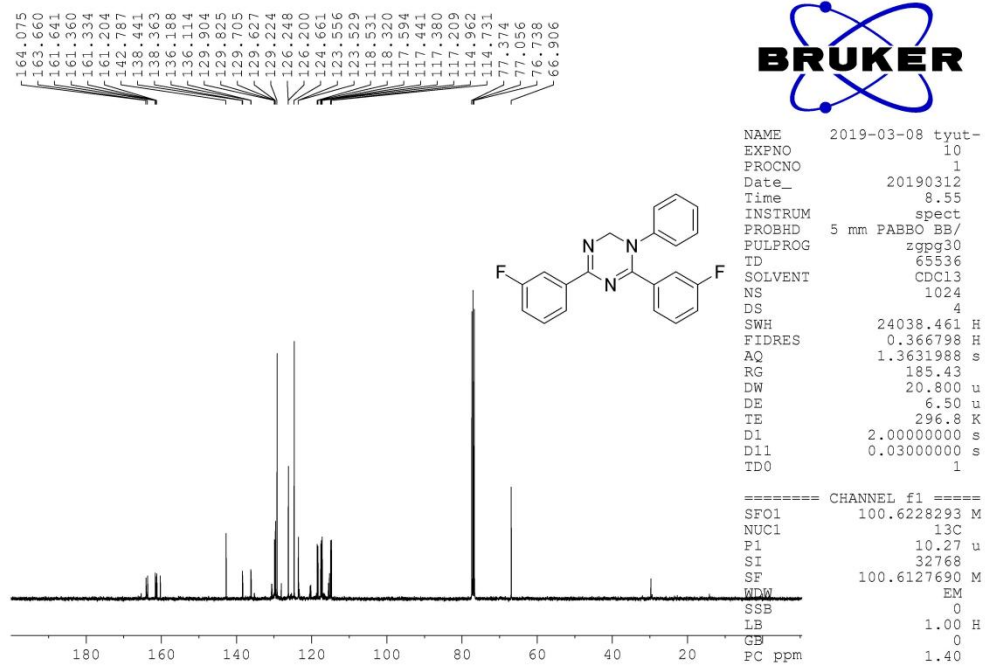

### 3ra

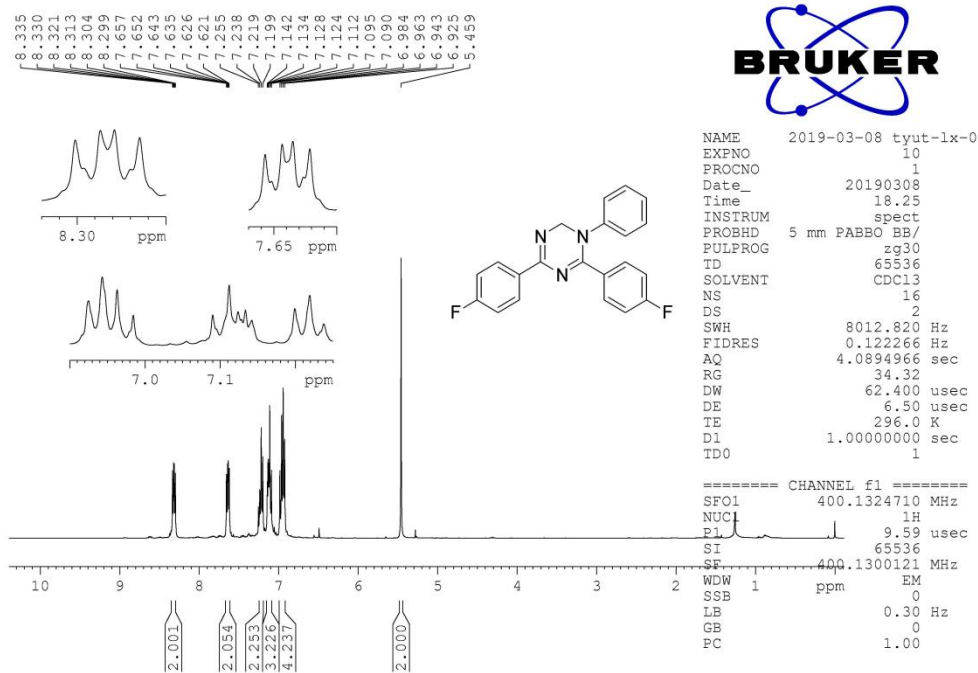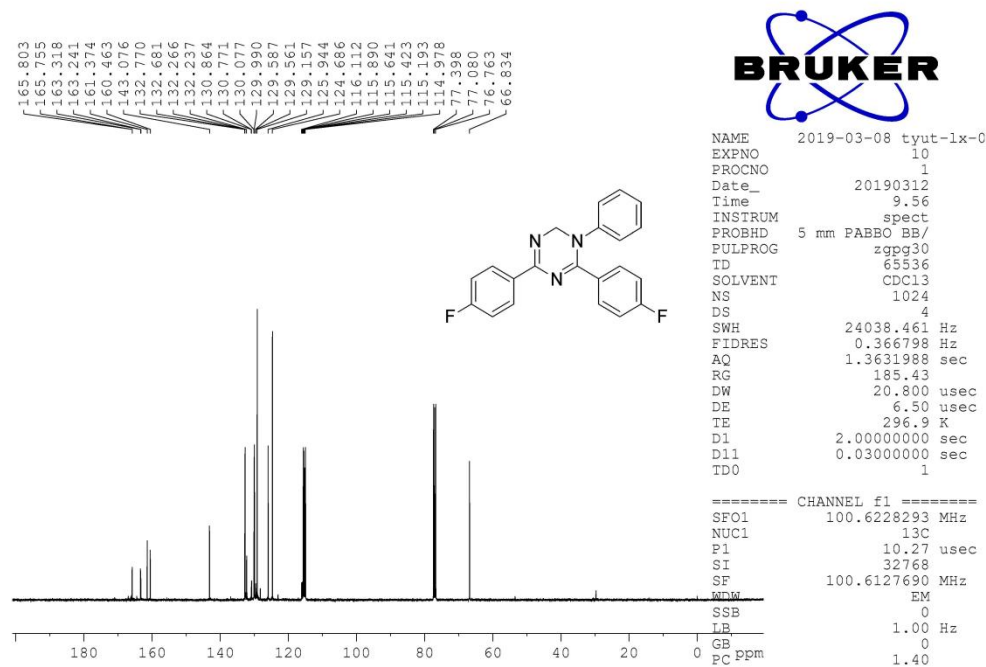

3sa

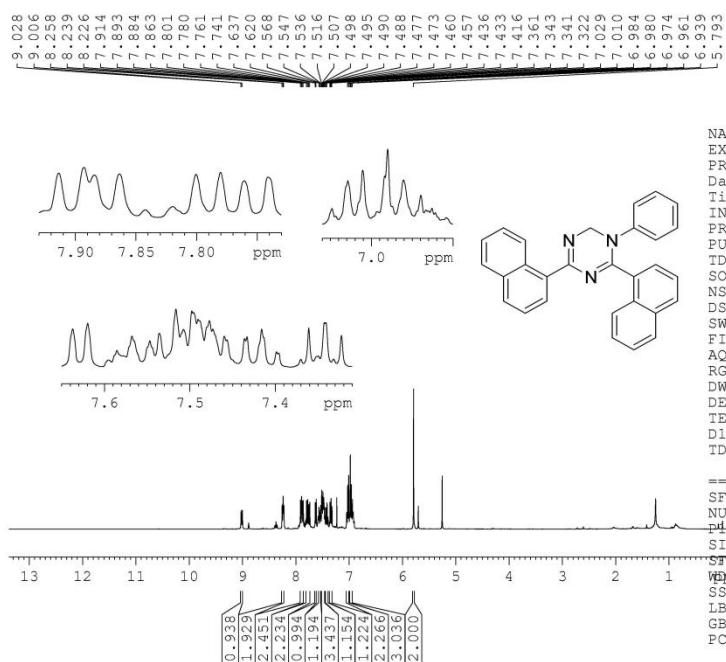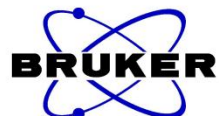

```

NAME      2019-03-13 tyut-lx-c
EXPNO     10
PROCNO    1
Date_     20190314
Time      2.03
INSTRUM   spect
PROBHD    5 mm PABBO BB/
PULPROG   zg30
TD        65536
SOLVENT   CDCl3
NS        16
DS        2
SWH       8012.820 Hz
FIDRES    0.122266 Hz
AQ        4.0894966 sec
RG        34.32
DW        62.400 usec
DE        6.50 usec
TE        295.7 K
D1        1.00000000 sec
D11       1
===== CHANNEL f1 =====
SFO1      400.1324710 MHz
NUC1      1H
P1        9.59 usec
SI        65536
SF        400.1300204 MHz
WDW       EM
SSB       0
LB        0.30 Hz
GB        0
PC        1.00
    
```

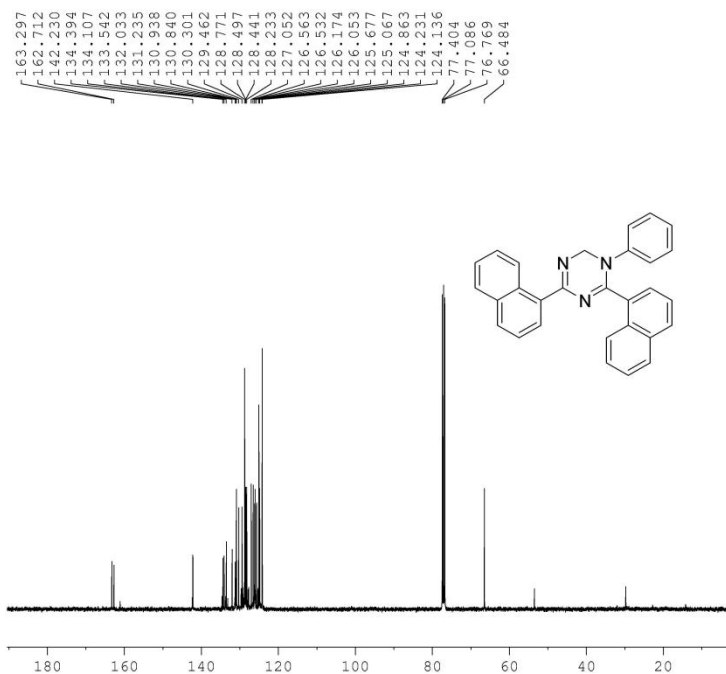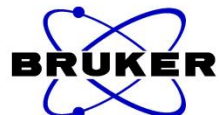

```

NAME      2019-03-13 tyut-1
EXPNO     10
PROCNO    1
Date_     20190315
Time      7.40
INSTRUM   spect
PROBHD    5 mm PABBO BB/
PULPROG   zgpg30
TD        65536
SOLVENT   CDCl3
NS        1024
DS        4
SWH       24038.461 Hz
FIDRES    0.366798 Hz
AQ        1.3631988 se
RG        185.43
DW        20.800 usec
DE        6.50 usec
TE        296.3 K
D1        2.00000000 se
D11       0.03000000 se
D111      1
===== CHANNEL f1 =====
SFO1      100.6228293 MHz
NUC1      13C
P1        10.27 usec
SI        32768
SF        100.6127690 MHz
WDW       EM
SSB       0
LB        1.00 Hz
GB        0
PC        1.40
    
```



3ta

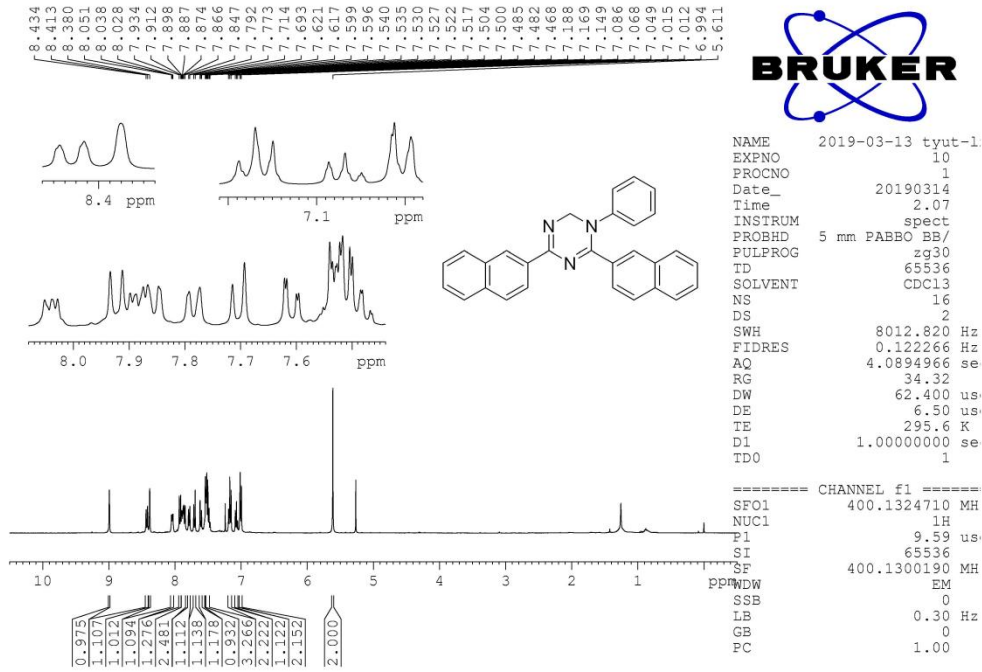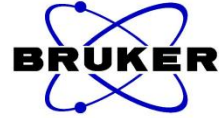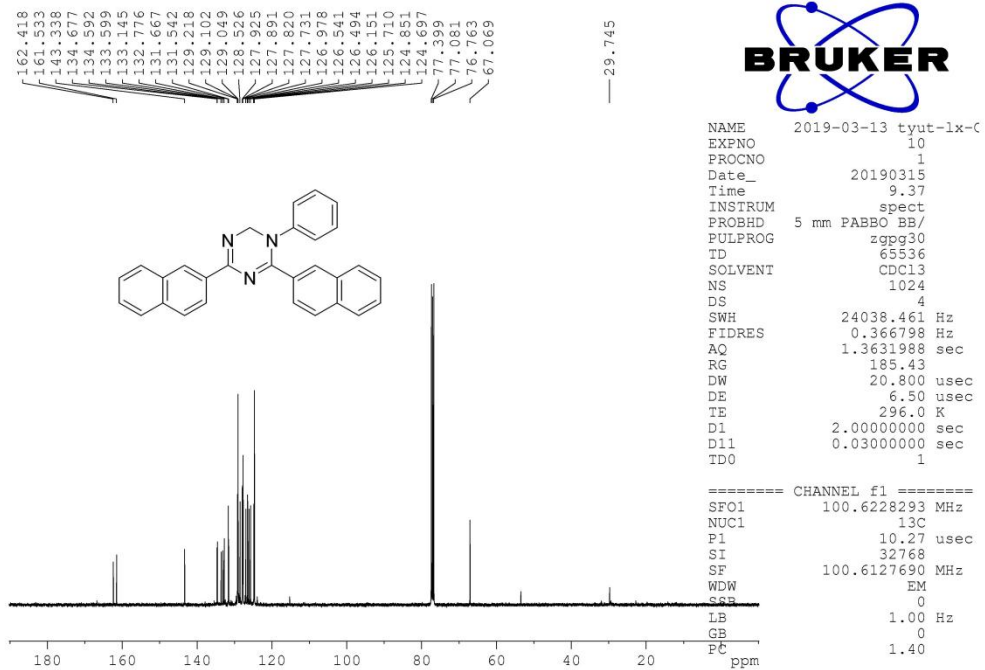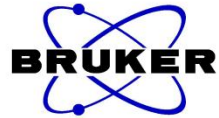

## 10. <sup>1</sup>H NMR and <sup>13</sup>C NMR for products 5 and 7

### 5aa and 7aa

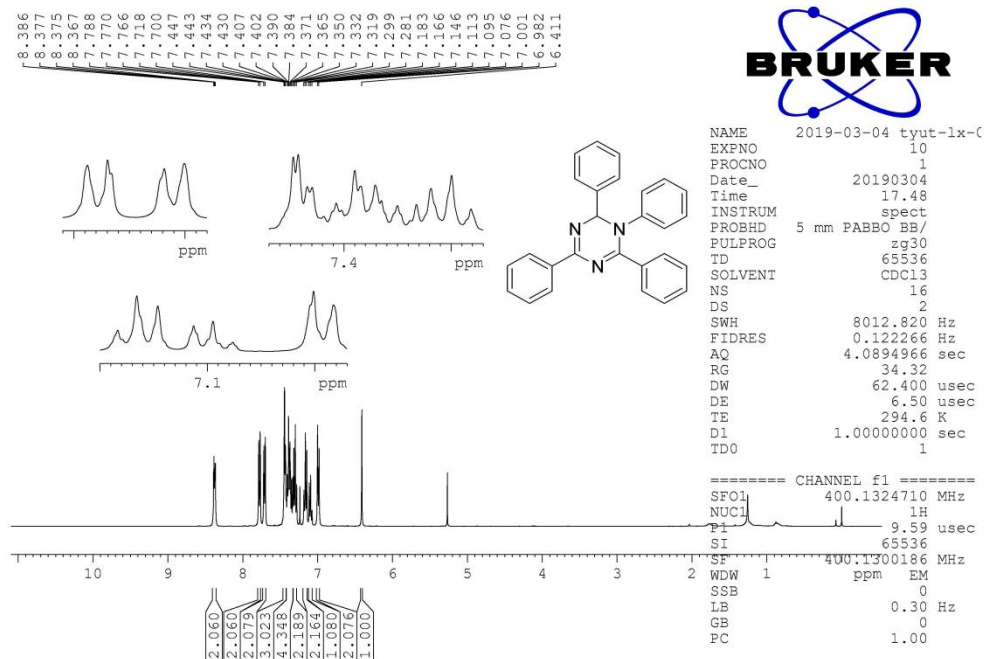

### 5ab and 7ab

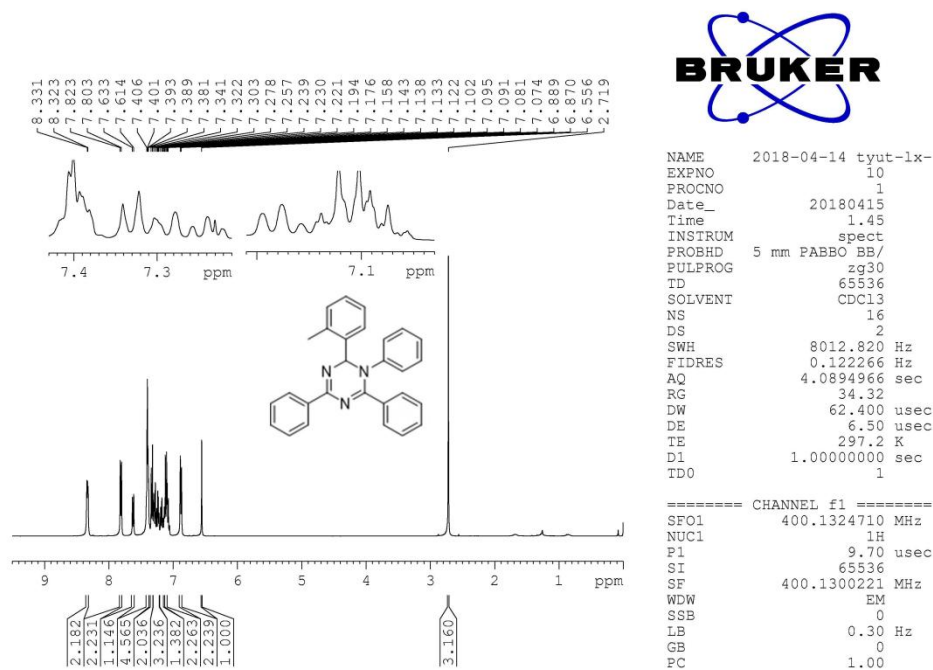

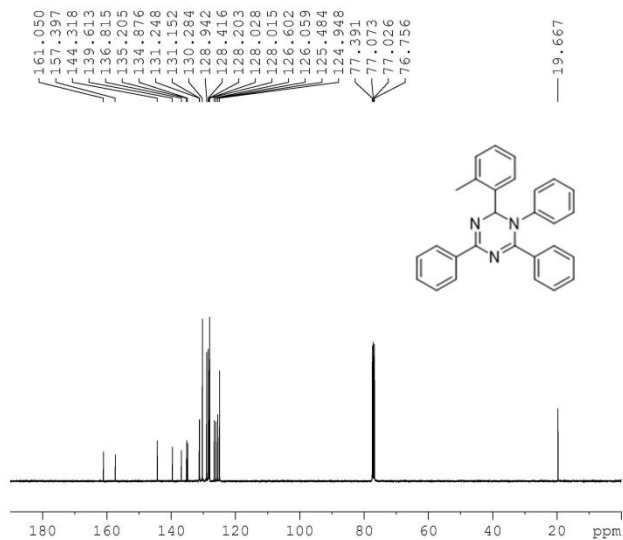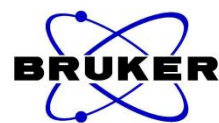

```

NAME      2018-04-14 tyut-lx-
EXPNO     11
PROCNO    1
Date_     20180415
Time      2.44
INSTRUM   spect
PROBHDD   5 mm PABBO BB/
PULPROG   zgpg30
TD         65536
SOLVENT   CDCl3
NS         1024
DS         4
SWH        24038.461 Hz
FIDRES     0.366798 Hz
AQ         1.3631988 sec
RG         185.43
DW         20.800 usec
DE         6.50 usec
TE         297.9 K
D1         2.00000000 sec
D11        0.03000000 sec
TD0        1

===== CHANNEL f1 =====
SFO1      100.6228293 MHz
NUC1       13C
P1         9.50 usec
SI         32768
SF         100.6127690 MHz
WDW        EM
SSB         0
LB         1.00 Hz
GB         0
PC         1.40

```

5ac and 7ac

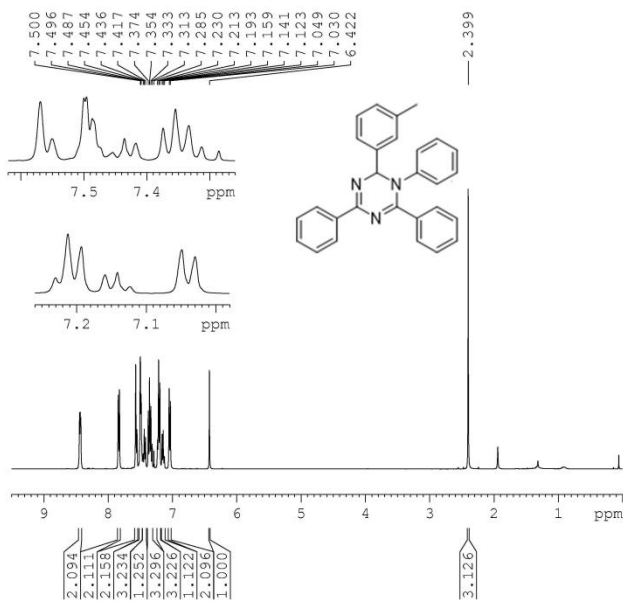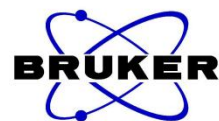

```

NAME      54
EXPNO     1
PROCNO    1
Date_     20180326
Time      17.09
INSTRUM   spect
PROBHDD   5 mm PABBO BB-
PULPROG   zg30
TD         65536
SOLVENT   CDCl3
NS         8
DS         0
SWH        8223.685 Hz
FIDRES     0.125483 Hz
AQ         3.9846387 sec
RG         64
DW         60.800 usec
DE         6.50 usec
TE         291.9 K
D1         1.00000000 sec
TD0        1

===== CHANNEL f1 =====
NUC1       1H
P1         14.00 usec
PL1        -3.13 dB
PL1W       20.50172997 W
SFO1      400.1324710 MHz
SI         32768
SF         400.1300000 MHz
WDW        EM
SSB         0
LB         0.30 Hz
GB         0

```

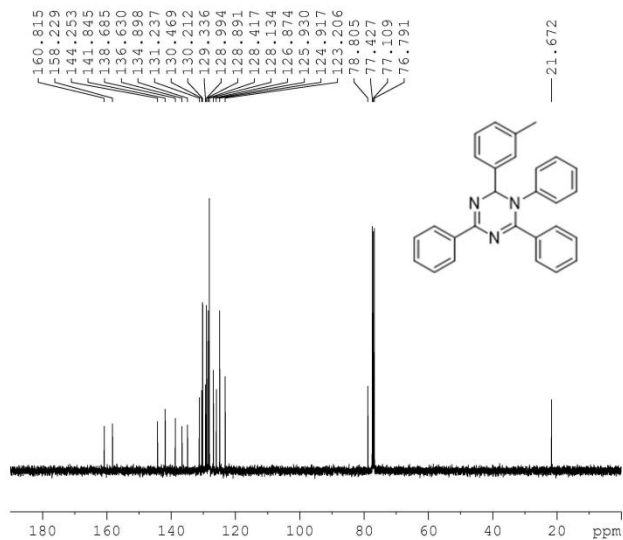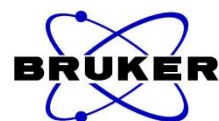

```

NAME          54
EXPNO         2
PROCNO        1
Date_         20180326
Time          17.13
INSTRUM       spect
PROBH         5 mm PABBO BB-
PULPROG       zgpg30
TD            65536
SOLVENT       CDCl3
NS            64
DS            4
SWH           24038.461 Hz
FIDRES        0.366798 Hz
AQ            1.3631988 sec
RG            32800
DW            20.800 usec
DE            6.50 usec
TE            293.4 K
D1            2.00000000 sec
D11           0.03000000 sec
TD0           1

===== CHANNEL f1 =====
NUC1          13C
P1            10.00 usec
PL1           -2.04 dB
PL1W          55.04534149 W
SFO1          100.6238364 MHz

===== CHANNEL f2 =====
CPDPRG2       waltz16
NUC2          1H
PCPD2         80.00 usec

```

5ad and 7ad

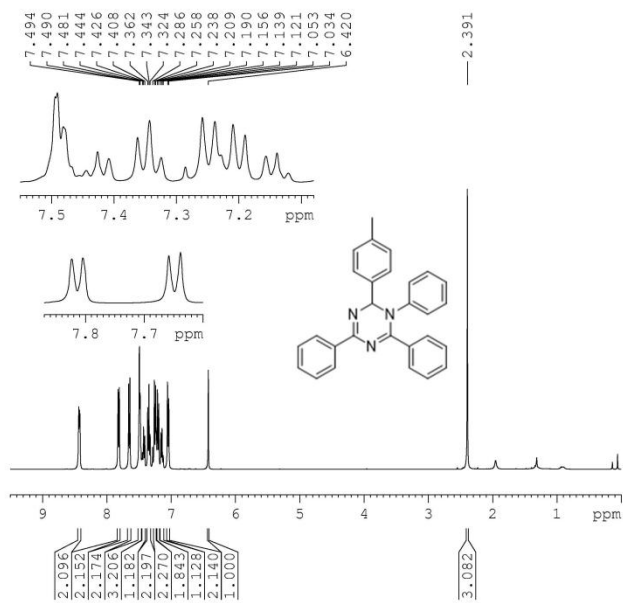

```

NAME          53
EXPNO         1
PROCNO        1
Date_         20180326
Time          17.01
INSTRUM       spect
PROBH         5 mm PABBO BB-
PULPROG       zg30
TD            65536
SOLVENT       CDCl3
NS            8
DS            0
SWH           8223.685 Hz
FIDRES        0.125483 Hz
AQ            3.9846387 sec
RG            64
DW            60.800 usec
DE            6.50 usec
TE            292.2 K
D1            1.00000000 sec
TD0           1

===== CHANNEL f1 =====
NUC1          1H
P1            14.00 usec
PL1           -3.13 dB
PL1W          20.50172997 W
SFO1          400.1324710 MHz
SI            32768
SF            400.1300000 MHz
WDS          EM
LB            0
LB            0.30 Hz
GB            0

```

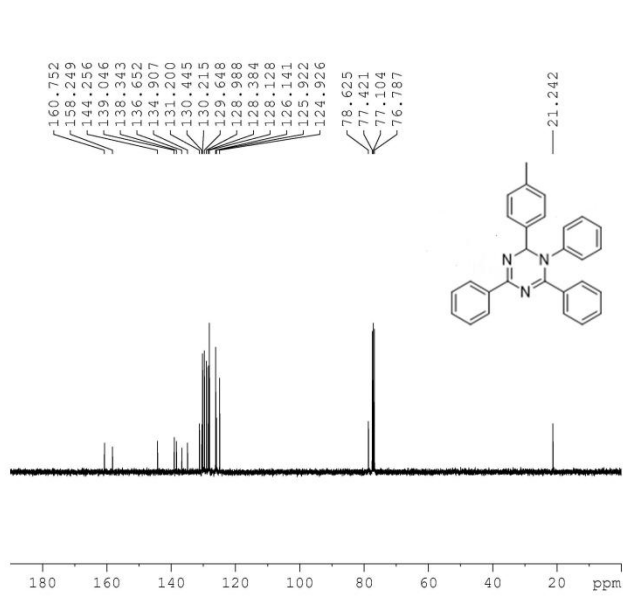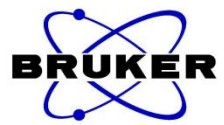

```

NAME          53
EXPNO         2
PROCNO        1
Date_         20180326
Time          17.05
INSTRUM       spect
PROBHD        5 mm PABBO BB-
PULPROG       zgpg30
TD            65536
SOLVENT       CDC13
NS            65
DS            4
SWH           24038.461 Hz
FIDRES        0.366798 Hz
AQ            1.3631988 sec
RG            32800
DW            20.800 usec
DE            6.50 usec
TE            293.4 K
D1            2.00000000 sec
D11           0.03000000 sec
TD0           1

===== CHANNEL f1 =====
NUC1          13C
P1            10.00 usec
PL1           -2.04 dB
PL1W          55.04534149 W
SFO1          100.6238364 MHz

===== CHANNEL f2 =====
CPDPRG2       waltz16
NUC2          1H
PCPD2         80.00 usec

```

5a

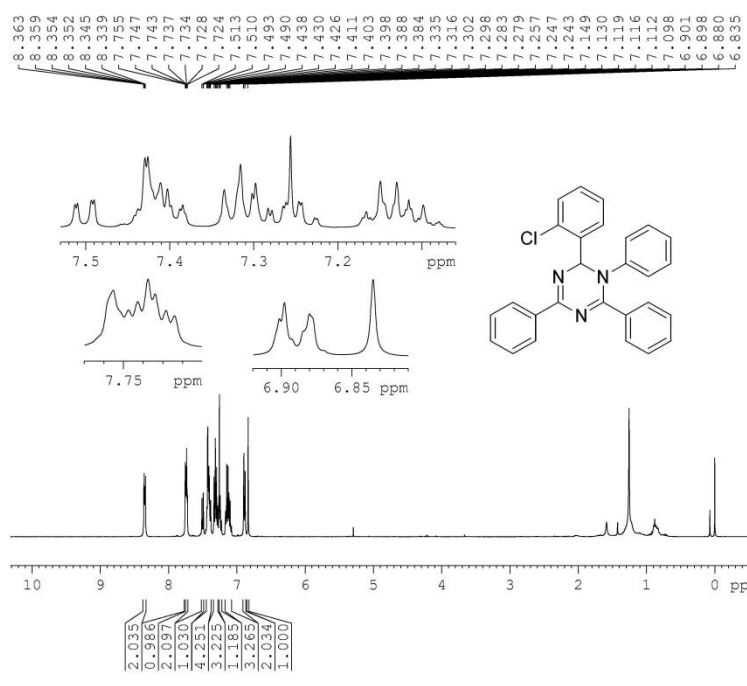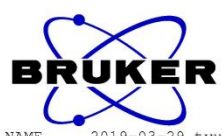

```

NAME          2019-03-29 tyut
EXPNO         10
PROCNO        1
Date_         20190329
Time          18.53
INSTRUM       spect
PROBHD        5 mm PABBO BB/
PULPROG       zg30
TD            65536
SOLVENT       CDC13
NS            16
DS            2
SWH           8012.820
FIDRES        0.122266
AQ            4.0894966
RG            87.46
DW            62.400
DE            6.50
TE            295.3
D1            1.00000000
TD0           1

===== CHANNEL f1 =====
SFO1          400.1324710
NUC1          1H
P1            9.59
SI            65536
SF            400.1300113
WDW           EM
SSB           0
LB            0.30
GB            0
PC            1.00

```

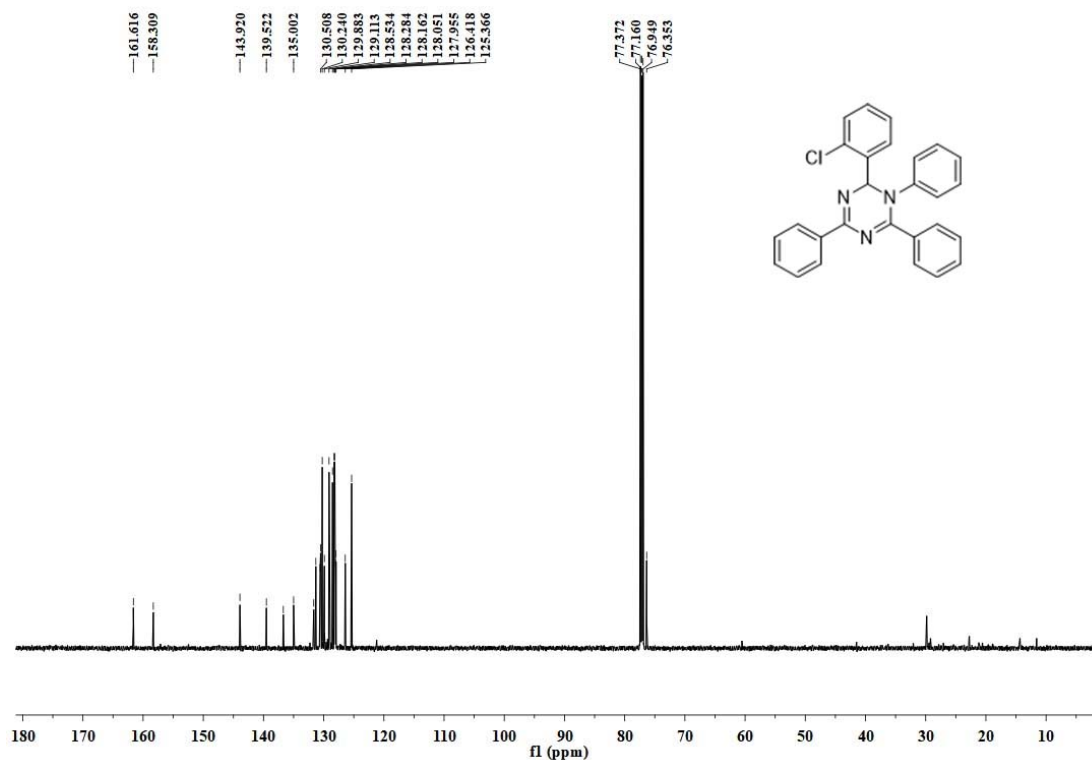

7ae

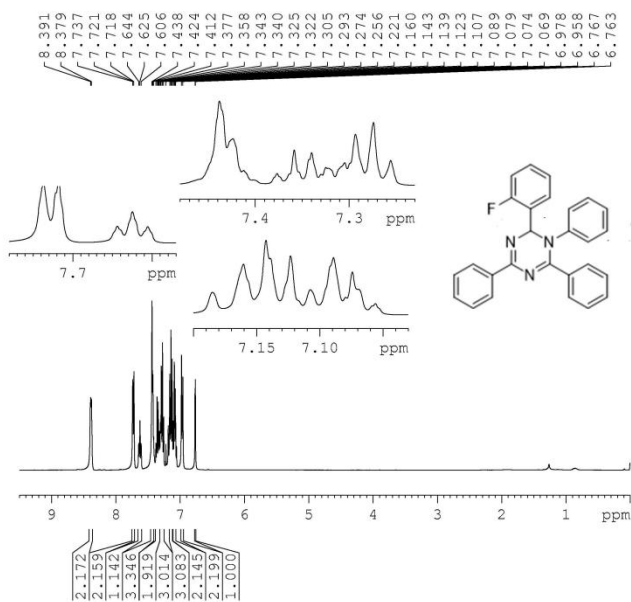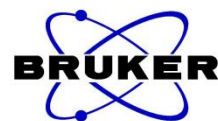

```

NAME      2018-04-14 tyut-lx-
EXPNO     10
PROCNO    1
Date_     20180415
Time      2.48
INSTRUM   spect
PROBHD    5 mm PABBO BB/
PULPROG   zg30
TD         65536
SOLVENT   CDCl3
NS         16
DS         2
SWH        8012.820 Hz
FIDRES     0.122266 Hz
AQ         4.0894966 sec
RG         34.32
DW         62.400 usec
DE         6.50 usec
TE         297.2 K
D1         1.00000000 sec
TD0        1
  
```

```

===== CHANNEL f1 =====
SFO1      400.1324710 MHz
NUC1      1H
P1        9.70 usec
SI        65536
SF        400.1300257 MHz
WDW       EM
SSB       0
LB        0.30 Hz
GB        0
PC        1.00
  
```

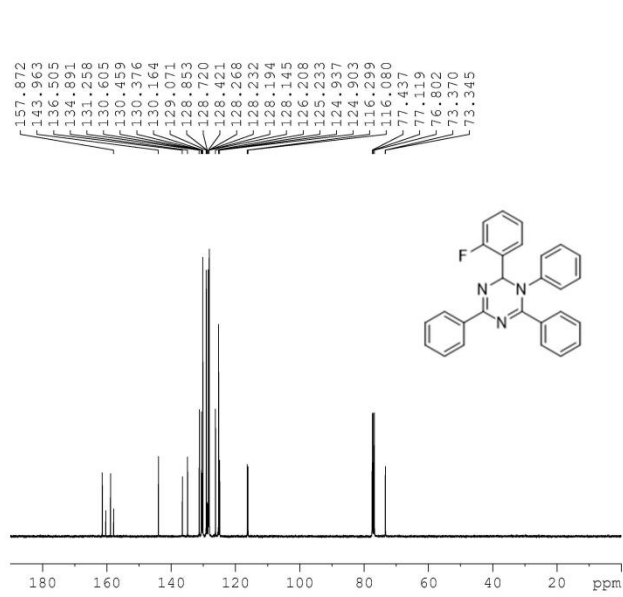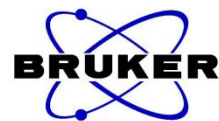

```

NAME      2018-04-14 tyut-lx-
EXPNO     11
PROCNO    1
Date_     20180415
Time      3.47
INSTRUM   spect
PROBHD    5 mm PABBO BB/
PULPROG   zgpg30
TD        65536
SOLVENT   CDCl3
NS        1024
DS        4
SWH       24038.461 Hz
FIDRES    0.366798 Hz
AQ        1.3631988 sec
RG        185.43
DW        20.800 usec
DE        6.50 usec
TE        297.9 K
D1        2.00000000 sec
D11       0.03000000 sec
TD0       1
  
```

```

===== CHANNEL f1 =====
SFO1     100.6228293 MHz
NUC1     13C
P1       9.50 usec
SI       32768
SF       100.6127690 MHz
WDW      EM
SSB      0
LB       1.00 Hz
GB       0
PC       1.40
  
```

5af

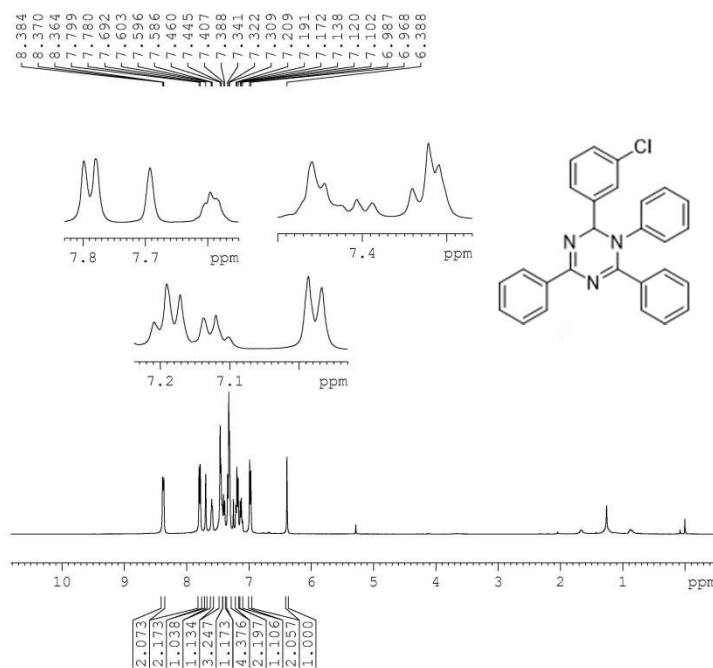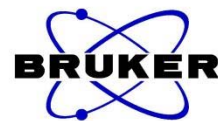

```

NAME      2019-03-29 tyut-1
EXPNO     10
PROCNO    1
Date_     20190329
Time      18.49
INSTRUM   spect
PROBHD    5 mm PABBO BB/
PULPROG   zg30
TD        65536
SOLVENT   CDCl3
NS        16
DS        2
SWH       8012.820 Hz
FIDRES    0.122266 Hz
AQ        4.0894966 se
RG        60.71
DW        62.400 us
DE        6.50 us
TE        295.3 K
D1        1.00000000 se
TD0       1
  
```

```

===== CHANNEL f1 =====
SFO1     400.1324710 Mf
NUC1     1H
P1       9.59 usec
SI       65536
SF       400.1300147 Mf
WDW      EM
SSB      0
LB       0.30 Hz
GB       0
PC       1.00
  
```

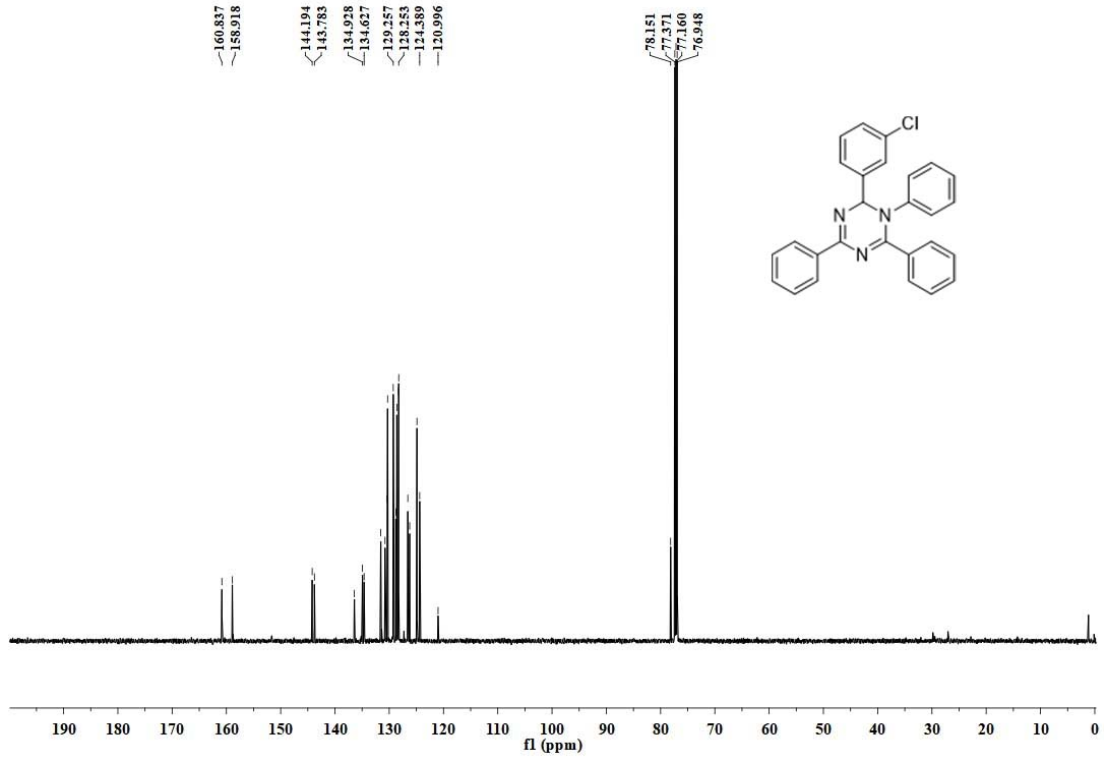

7af

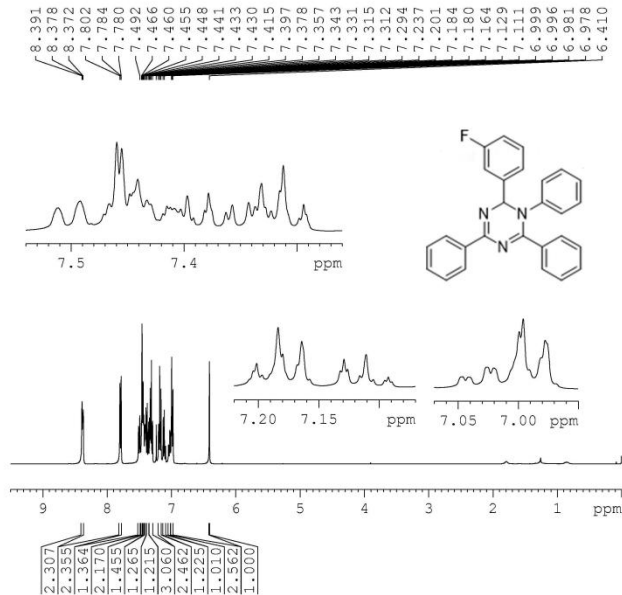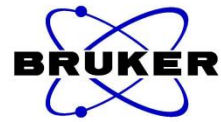

```

NAME      2018-04-18 tyut-lx-
EXPNO     20
PROCNO    1
Date_     20180420
Time      0.13
INSTRUM   spect
PROBHD    5 mm PABBO BB/
PULPROG   zg30
TD         65536
SOLVENT   CDCl3
NS         16
DS         2
SWH       8012.820 Hz
FIDRES    0.122266 Hz
AQ         4.0894966 sec
RG         34.32
DW         62.400 usec
DE         6.50 usec
TE         294.9 K
D1         1.0000000 sec
TDO        1
===== CHANNEL f1 =====
SFO1      400.1324710 MHz
NUC1       1H
P1         9.70 usec
SI         65536
SF         400.1300190 MHz
WDW        EM
SSB         0
LB         0.30 Hz
GB         0
PC         1.00
  
```



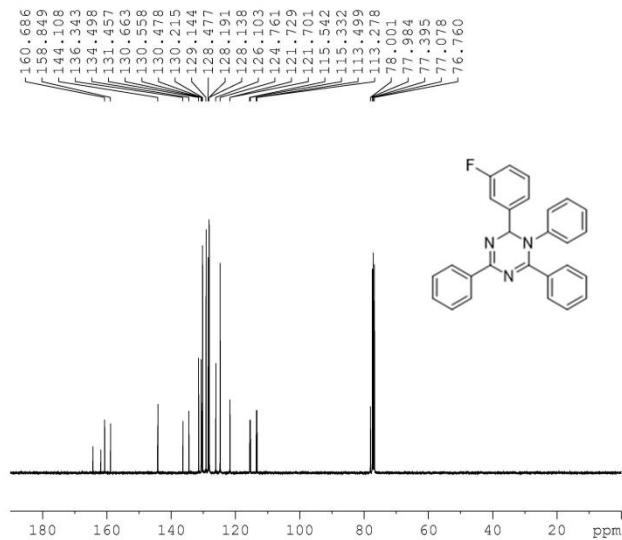

```

NAME      2018-04-18 tyut-lx-
EXPNO     21
PROCNO    1
Date_     20180420
Time      1.12
INSTRUM   spect
PROBHD    5 mm PABBO BB/
PULPROG   zgpg30
TD         65536
SOLVENT   CDCl3
NS         1024
DS         4
SWH        24038.461 Hz
FIDRES     0.366798 Hz
AQ         1.3631988 sec
RG         185.43
DW         20.800 usec
DE         6.50 usec
TE         295.9 K
D1         2.00000000 sec
D11        0.03000000 sec
TD0        1

```

```

===== CHANNEL f1 =====
SFO1      100.6228293 MHz
NUC1      13C
P1         9.50 usec
SI        32768
SF        100.6127690 MHz
WDW        EM
SSB         0
LB         1.00 Hz
GB         0
PC         1.40

```

### 5ag and 7al

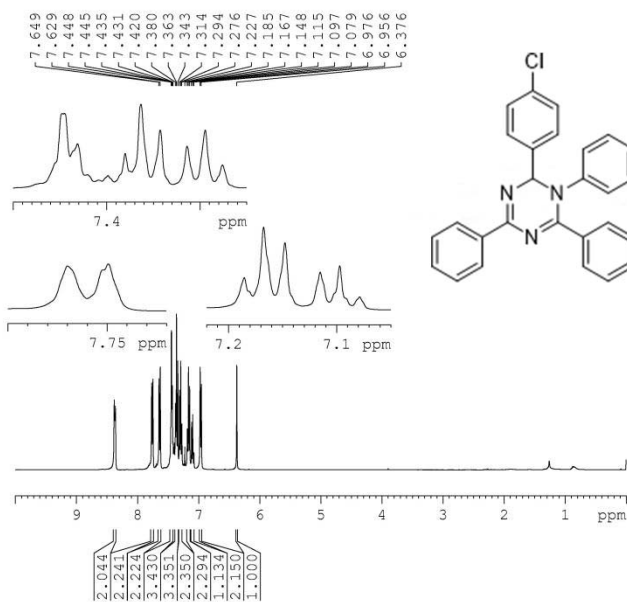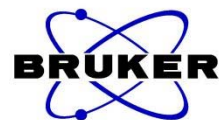

```

NAME      2018041206
EXPNO     10
PROCNO    1
Date_     20180413
Time      5.44
INSTRUM   spect
PROBHD    5 mm PABBO BB/
PULPROG   zg30
TD         65536
SOLVENT   CDCl3
NS         16
DS         2
SWH        8012.820 Hz
FIDRES     0.122266 Hz
AQ         4.0894966 sec
RG         34.32
DW         62.400 usec
DE         6.50 usec
TE         297.8 K
D1         1.00000000 sec
TD0        1

```

```

===== CHANNEL f1 =====
SFO1      400.1324710 MHz
NUC1      1H
P1         9.70 usec
SI        65536
SF        400.1300235 MHz
WDW        EM
SSB         0
LB         0.30 Hz
GB         0
PC         1.00

```

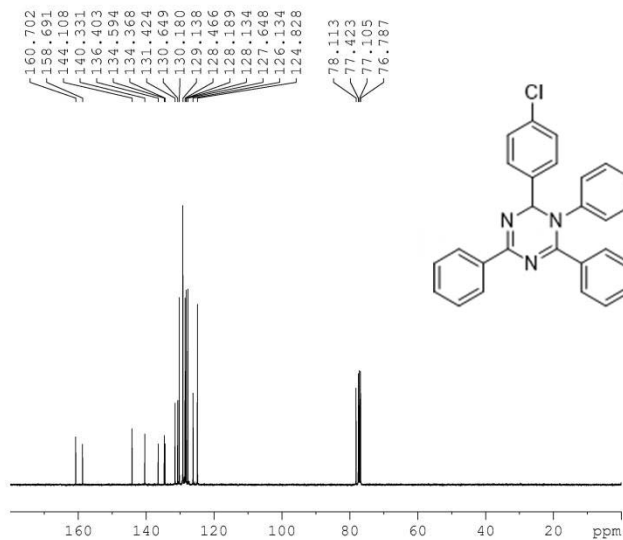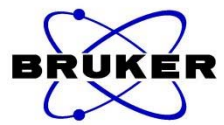

```

NAME          2018041206
EXPNO         11
PROCNO        1
Date_         20180413
Time          6.43
INSTRUM       spect
PROBHHD       5 mm PABBO BB/
PULPROG       zgpg30
TD            65536
SOLVENT       CDCl3
NS            1024
DS            4
SWH           24038.461 Hz
FIDRES        0.366798 Hz
AQ            1.3631988 sec
RG            185.43
DW            20.800 usec
DE            6.50 usec
TE            298.5 K
D1            2.00000000 sec
D11           0.03000000 sec
TD0           1

===== CHANNEL f1 =====
SFO1          100.6228293 MHz
NUC1          13C
P1            9.50 usec
SI            32768
SF            100.6127690 MHz
WDW           EM
SSB           0
LB            1.00 Hz
GB            0
PC            1.40
  
```

7ag

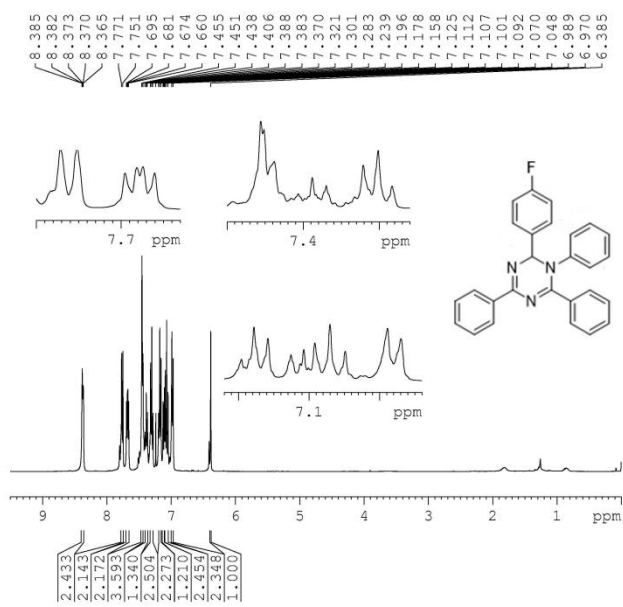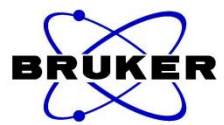

```

NAME          2018-04-18 tyut-lx-
EXPNO         10
PROCNO        1
Date_         20180420
Time          3.39
INSTRUM       spect
PROBHHD       5 mm PABBO BB/
PULPROG       zg30
TD            65536
SOLVENT       CDCl3
NS            16
DS            2
SWH           8012.820 Hz
FIDRES        0.122266 Hz
AQ            4.0894966 sec
RG            34.32
DW            62.400 usec
DE            6.50 usec
TE            294.9 K
D1            1.00000000 sec
TD0           1

===== CHANNEL f1 =====
SFO1          400.1324710 MHz
NUC1          1H
P1            9.70 usec
SI            65536
SF            400.1300182 MHz
WDW           EM
SSB           0
LB            0.30 Hz
GB            0
PC            1.00
  
```

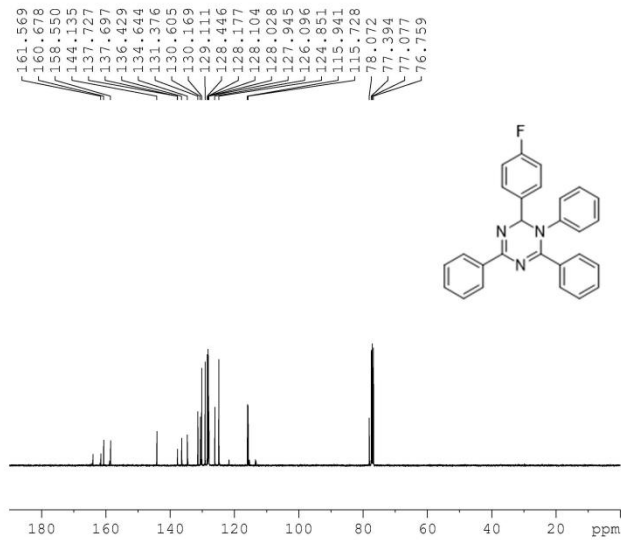

```

NAME      2018-04-18 tyut-lx-
EXPNO     12
PROCNO    1
Date_     20180420
Time      4.38
INSTRUM   spect
PROBHD    5 mm PABBO BB/
PULPROG   zgpg30
TD        65536
SOLVENT   CDCl3
NS        1024
DS        4
SWH       24038.461 Hz
FIDRES    0.366798 Hz
AQ        1.3631988 sec
RG        185.43
DW        20.800 usec
DE        6.50 usec
TE        295.8 K
D1        2.00000000 sec
D11       0.03000000 sec
TD0       1

```

```

===== CHANNEL f1 =====
SFO1     100.6228293 MHz
NUC1     13C
P1       9.50 usec
SI       32768
SF       100.6127690 MHz
WDW      EM
SSB      0
LB       1.00 Hz
GB       0
PC       1.40

```

### 5ai and 7ai

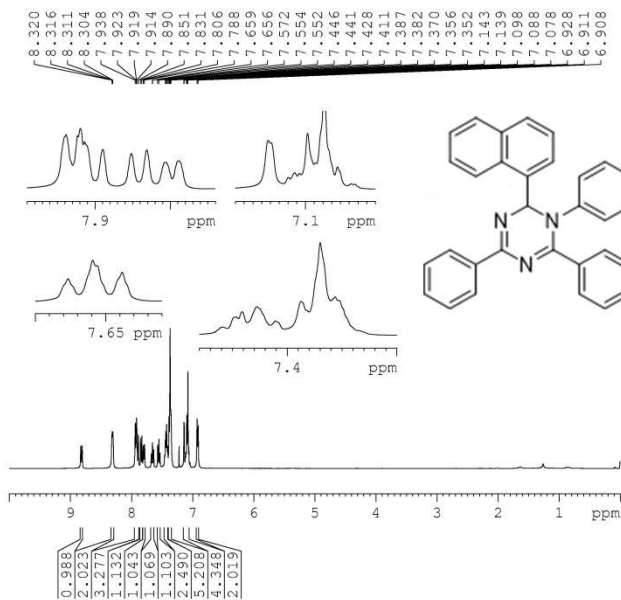

```

NAME      2018-04-14 tyut-lx-
EXPNO     10
PROCNO    1
Date_     20180415
Time      0.42
INSTRUM   spect
PROBHD    5 mm PABBO BB/
PULPROG   zg30
TD        65536
SOLVENT   CDCl3
NS        16
DS        2
SWH       8012.820 Hz
FIDRES    0.122266 Hz
AQ        4.0894966 sec
RG        34.32
DW        62.400 usec
DE        6.50 usec
TE        297.2 K
D1        1.00000000 sec
TD0       1

```

```

===== CHANNEL f1 =====
SFO1     400.1324710 MHz
NUC1     1H
P1       9.70 usec
SI       65536
SF       400.1300248 MHz
WDW      EM
SSB      0
LB       0.30 Hz
GB       0
PC       1.00

```

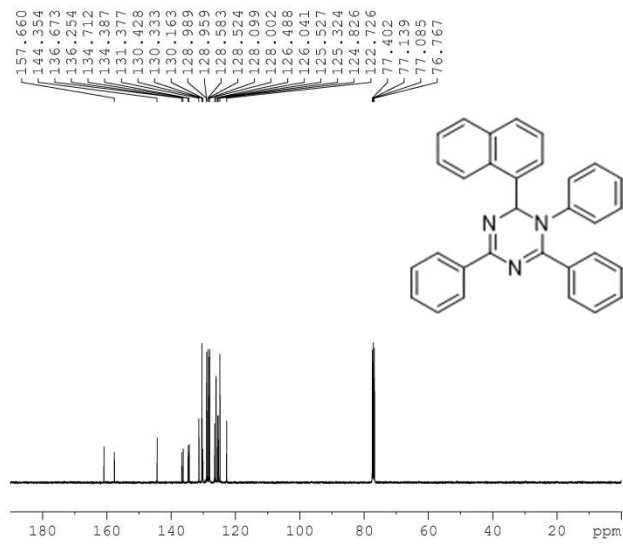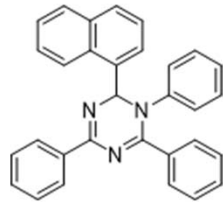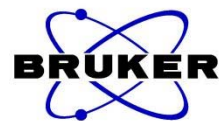

```

NAME      2018-04-14 tyut-lx-
EXPNO     11
PROCNO    1
Date_     20180415
Time      1.41
INSTRUM   spect
PROBHD    5 mm PABBO BB/
PULPROG   zgpg30
TD        65536
SOLVENT   CDC13
NS        1024
DS        4
SWH       24038.461 Hz
FIDRES    0.366798 Hz
AQ        1.3631988 sec
RG        185.43
DW        20.800 usec
DE        6.50 usec
TE        297.9 K
D1        2.00000000 sec
D11       0.03000000 sec
TD0       1
  
```

```

===== CHANNEL f1 =====
SFO1     100.6228293 MHz
NUC1     13C
P1       9.50 usec
SI       32768
SF       100.6127690 MHz
WDW      EM
SSB      0
LB       1.00 Hz
GB       0
PC       1.40
  
```

5aj and 7ah

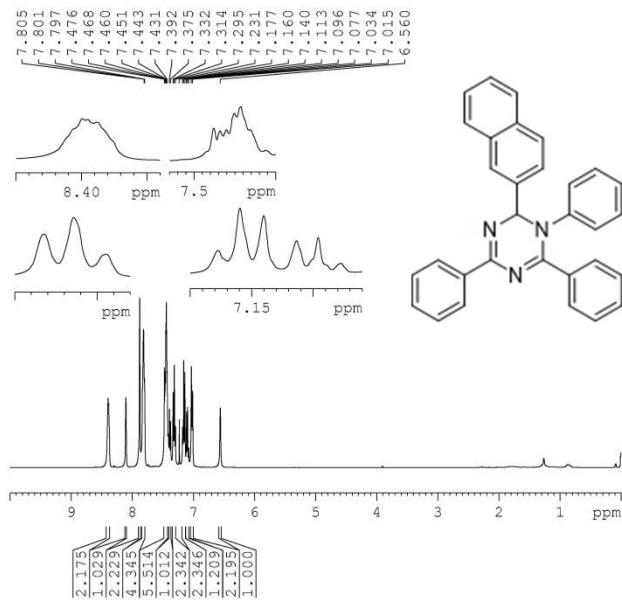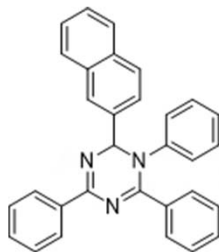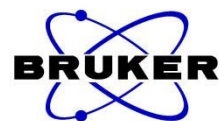

```

NAME      2018041205
EXPNO     10
PROCNO    1
Date_     20180413
Time      4.41
INSTRUM   spect
PROBHD    5 mm PABBO BB/
PULPROG   zg30
TD        65536
SOLVENT   CDC13
NS        16
DS        2
SWH       8012.820 Hz
FIDRES    0.122266 Hz
AQ        4.0894966 sec
RG        34.32
DW        62.400 usec
DE        6.50 usec
TE        297.8 K
D1        1.00000000 sec
TD0       1
  
```

```

===== CHANNEL f1 =====
SFO1     400.1324710 MHz
NUC1     1H
P1       9.70 usec
SI       65536
SF       400.1300216 MHz
WDW      EM
SSB      0
LB       0.30 Hz
GB       0
PC       1.00
  
```

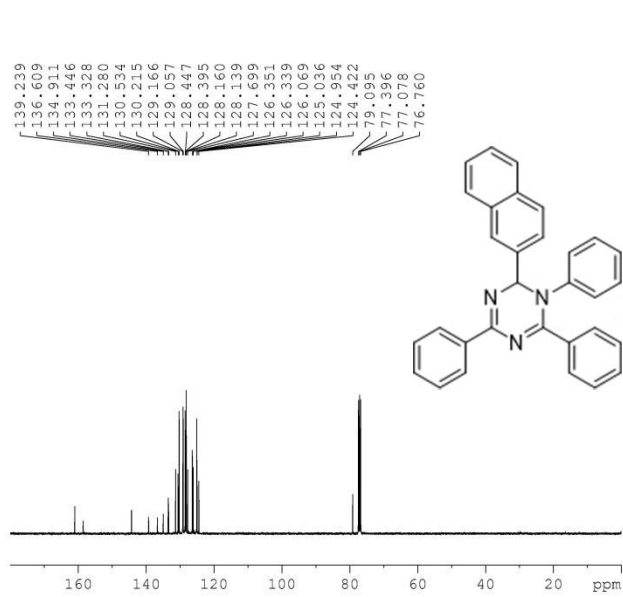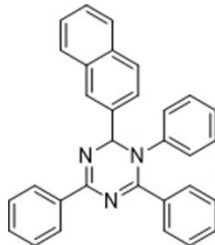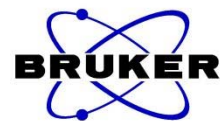

```

NAME          2018041205
EXPNO         11
PROCNO        1
Date_         20180413
Time          5.40
INSTRUM       spect
PROBHD        5 mm PABBO BB/
PULPROG       zgpg30
TD            65536
SOLVENT       CDC13
NS            1024
DS            4
SWH           24038.461 Hz
FIDRES        0.366798 Hz
AQ            1.3631988 sec
RG            185.43
DW            20.800 usec
DE            6.50 usec
TE            298.5 K
D1            2.00000000 sec
D11           0.03000000 sec
TD0           1
  
```

```

===== CHANNEL f1 =====
SFO1          100.6228293 MHz
NUC1          13C
P1            9.50 usec
SI            32768
SF            100.6127690 MHz
WDW           EM
SSB           0
LB            1.00 Hz
GB            0
PC            1.40
  
```

5ak

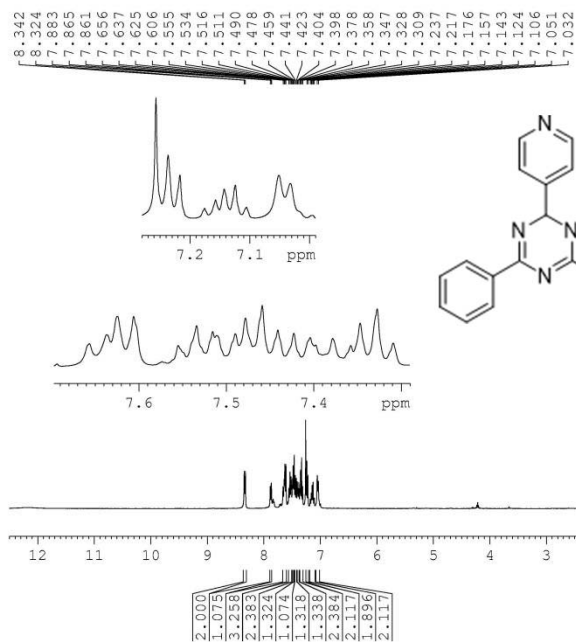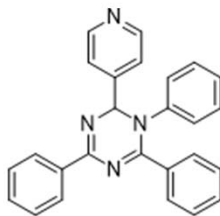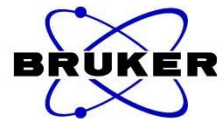

```

NAME          2019-03-29 tyut-lx-1
EXPNO         10
PROCNO        1
Date_         20190329
Time          18.58
INSTRUM       spect
PROBHD        5 mm PABBO BB/
PULPROG       zg30
TD            65536
SOLVENT       CDC13
NS            16
DS            2
SWH           8012.820 Hz
FIDRES        0.122266 Hz
AQ            4.0894966 sec
RG            74.25
DW            62.400 usec
DE            6.50 usec
TE            295.3 K
D1            1.00000000 sec
TD0           1
  
```

```

===== CHANNEL f1 =====
SFO1          400.1324710 MHz
NUC1          1H
P1            9.59 usec
SI            65536
SF            400.1300109 MHz
WDW           EM
SSB           0
LB            0.30 Hz
GB            0
PC            1.00
  
```

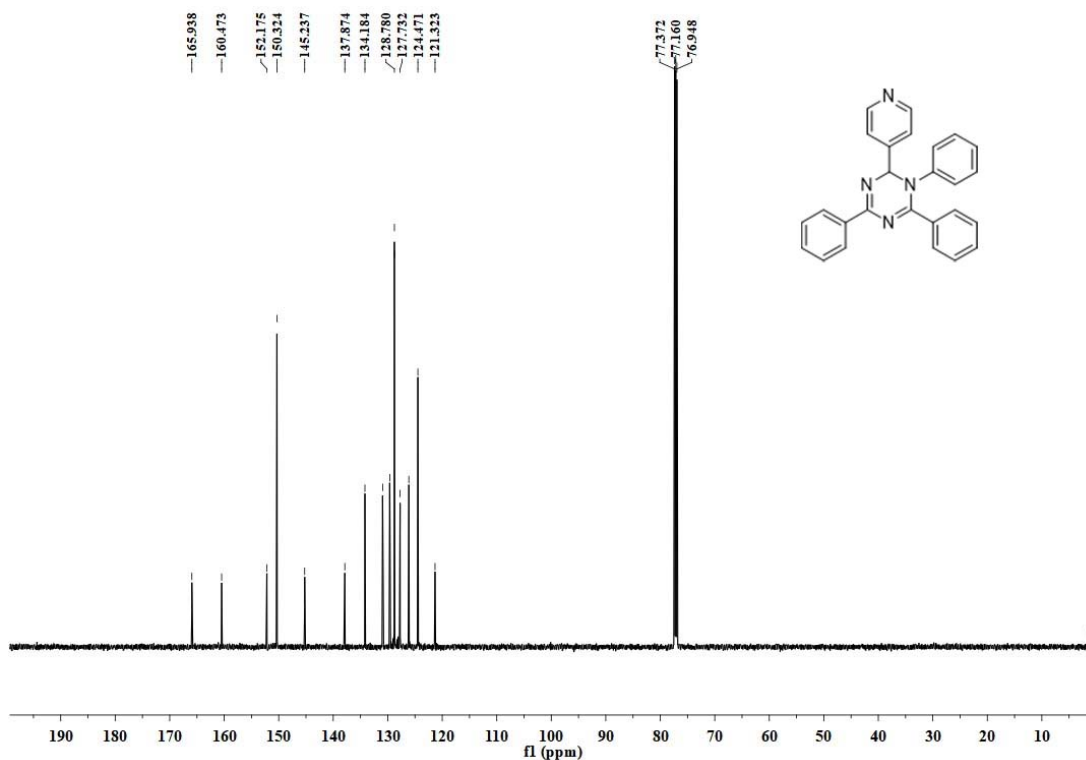

5al

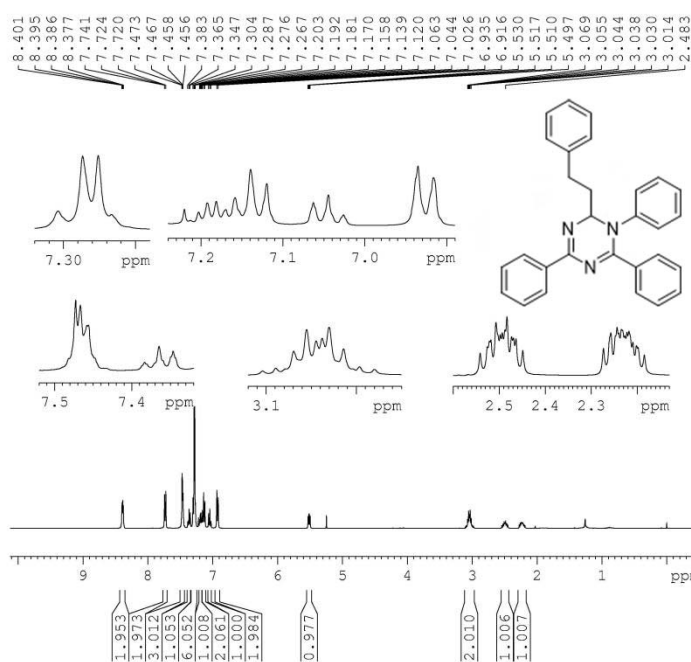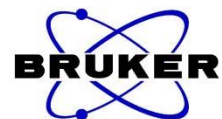

NAME 2019-04-03 tyut-lx-3  
 EXPNO 10  
 PROCNO 1  
 Date\_ 20190403  
 Time 21.36  
 INSTRUM spect  
 PROBHD 5 mm PABBO BB/  
 PULPROG zg30  
 TD 65536  
 SOLVENT CDCl3  
 NS 16  
 DS 2  
 SWH 8012.820 Hz  
 FIDRES 0.122266 Hz  
 AQ 4.0894966 sec  
 RG 34.32  
 DW 62.400 usec  
 DE 6.50 usec  
 TE 296.1 K  
 D1 1.0000000 sec  
 TD0 1

===== CHANNEL f1 =====  
 SFO1 400.1324710 MHz  
 NUC1 1H  
 P1 9.59 usec  
 SI 65536  
 SF 400.1300258 MHz  
 WDW EM  
 SSB 0  
 LB 0.30 Hz  
 GB 0  
 PC 1.00

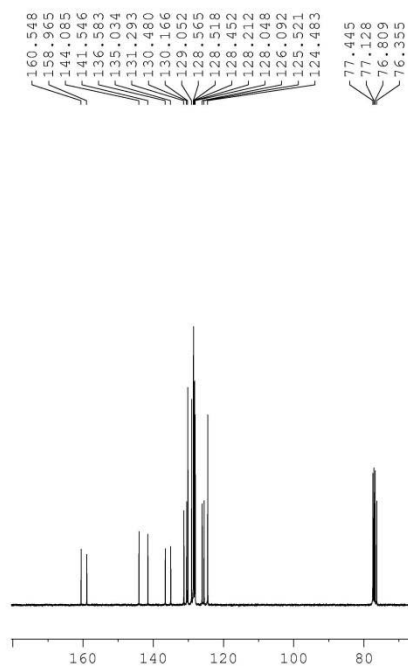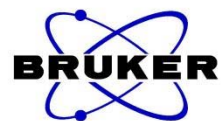

NAME 2019-04-08 tyut-1x-0  
EXPNO 10  
PROCNO 1  
Date\_ 20190409  
Time 0.37  
INSTRUM spect  
PROBHD 5 mm PABBO BB/  
PULPROG zgpg30  
TD 65536  
SOLVENT CDCl3  
NS 1024  
DS 4  
SWH 24038.461 Hz  
FIDRES 0.366798 Hz  
AQ 1.3631988 sec  
RG 185.43  
DW 20.800 usec  
DE 6.50 usec  
TE 295.6 K  
D1 2.00000000 sec  
D11 0.03000000 sec  
TD0 1

==== CHANNEL f1 =====  
SFO1 100.6228293 MHz  
NUC1 13C  
P1 10.27 usec  
SI 32768  
SF 100.6127690 MHz  
WDW EM  
SSB 0  
LB 1.00 Hz  
GB 0  
CB 1.40

5an

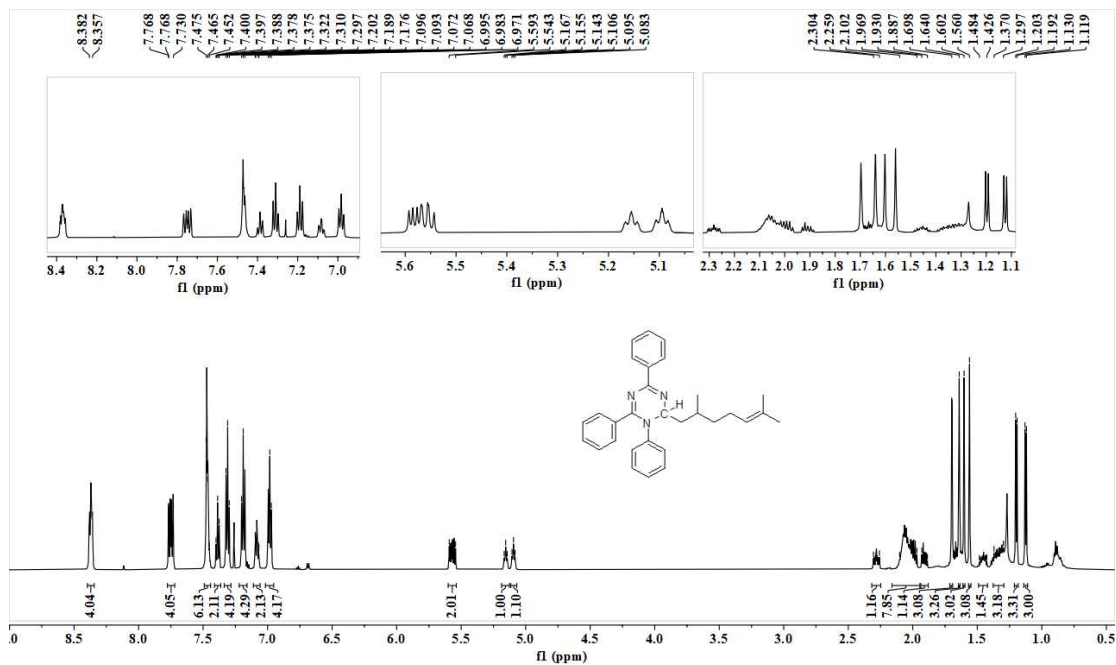

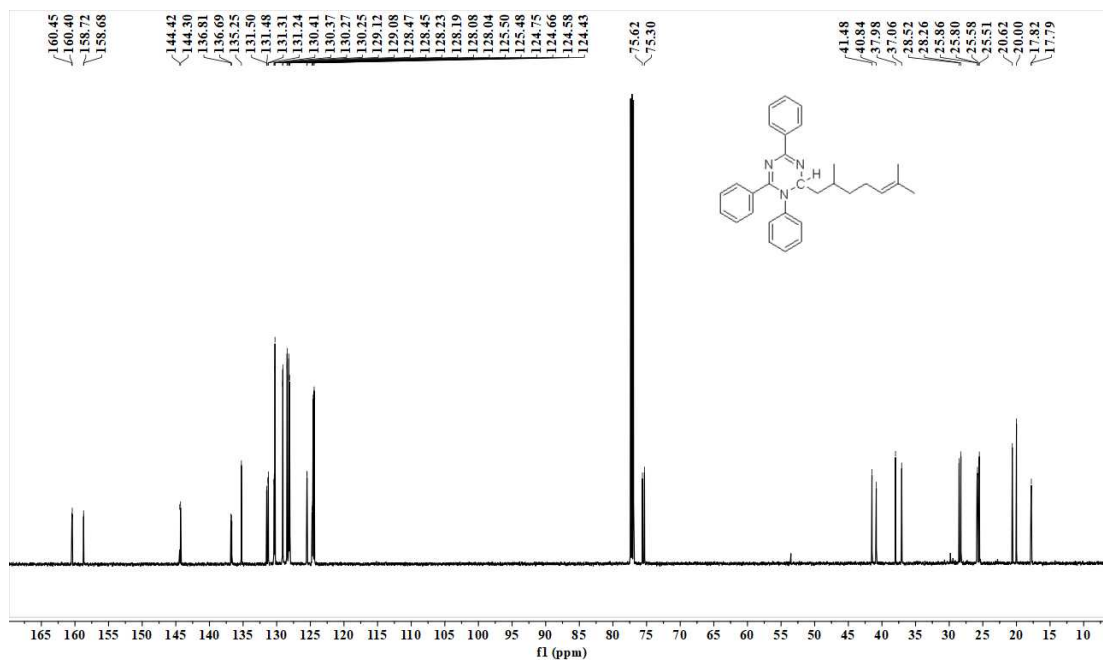

7aj

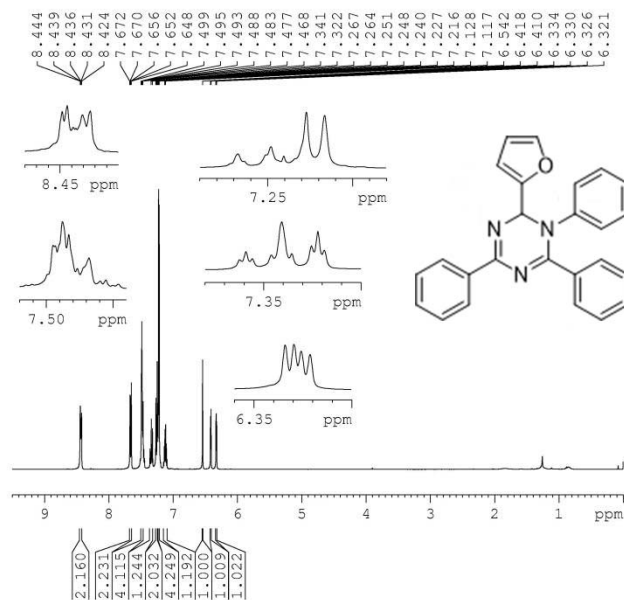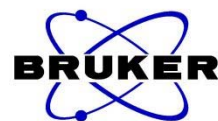

```

NAME      2018-04-18 tyut-lx-
EXPNO     10
PROCNO    1
Date_     20180420
Time      4.41
INSTRUM   spect
PROBHD    5 mm PABBO BB/
PULPROG   zg30
TD         65536
SOLVENT   CDCl3
NS         16
DS         2
SWH        8012.820 Hz
FIDRES     0.122266 Hz
AQ         4.0894966 sec
RG         34.32
DW         62.400 usec
DE         6.50 usec
TE         295.2 K
D1         1.0000000 sec
TD0        1

===== CHANNEL f1 =====
SFO1      400.1324710 MHz
NUC1       1H
P1         9.70 usec
SI         65536
SF         400.1300176 MHz
WDW        EM
SSB        0
LB         0.30 Hz
GB         0
PC         1.00
  
```



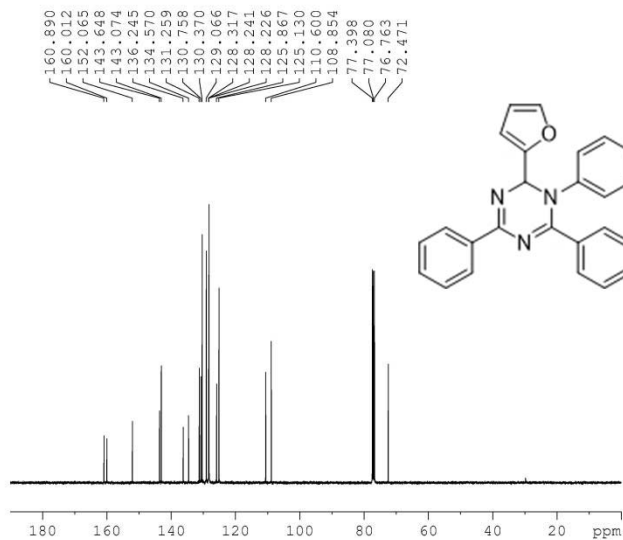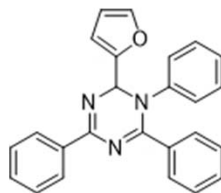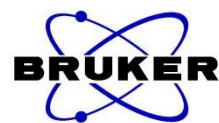

```

NAME      2018-04-18 tyut-lx-
EXPNO     11
PROCNO    1
Date_     20180420
Time      5.40
INSTRUM   spect
PROBHHD   5 mm PABBO BB/
PULPROG   zgpg30
TD         65536
SOLVENT   CDCl3
NS         1024
DS         4
SWH        24038.461 Hz
FIDRES     0.366798 Hz
AQ         1.3631988 sec
RG         185.43
DW         20.800 usec
DE         6.50 usec
TE         295.9 K
D1         2.00000000 sec
D11        0.03000000 sec
TD0        1
  
```

```

===== CHANNEL f1 =====
SFO1      100.6228293 MHz
NUC1       13C
P1         9.50 usec
SI         32768
SF         100.6127690 MHz
WDW        EM
SSB        0
LB         1.00 Hz
GB         0
PC         1.40
  
```

7ak

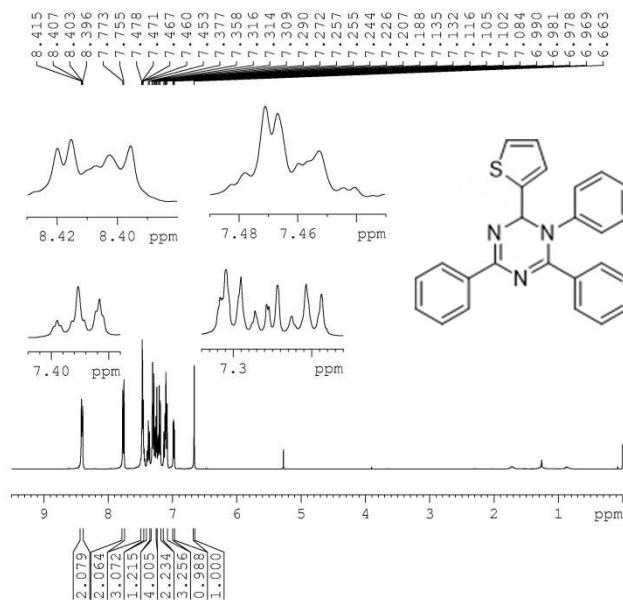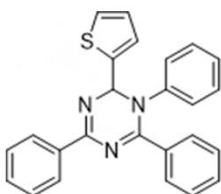

```

NAME      2018041204
EXPNO     10
PROCNO    1
Date_     20180413
Time      3.37
INSTRUM   spect
PROBHHD   5 mm PABBO BB/
PULPROG   zg30
TD         65536
SOLVENT   CDCl3
NS         16
DS         2
SWH        8012.820 Hz
FIDRES     0.122266 Hz
AQ         4.0894966 sec
RG         60.71
DW         62.400 usec
DE         6.50 usec
TE         297.8 K
D1         1.00000000 sec
TD0        1
  
```

```

===== CHANNEL f1 =====
SFO1      400.1324710 MHz
NUC1       1H
P1         9.70 usec
SI         65536
SF         400.1300167 MHz
WDW        EM
SSB        0
LB         0.30 Hz
GB         0
PC         1.00
  
```

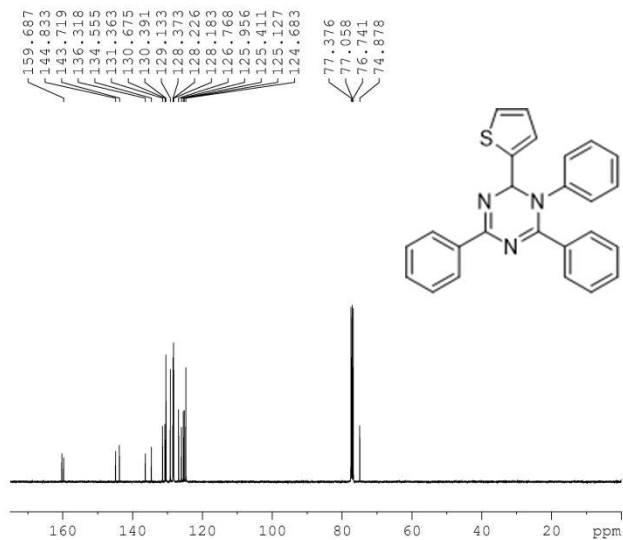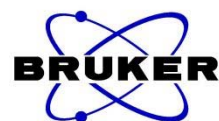

```

NAME          2018041204
EXPNO         11
PROCNO        1
Date_         20180413
Time          4.36
INSTRUM       spect
PROBHD        5 mm PABBO BB/
PULPROG       zgpg30
TD            65536
SOLVENT       CDC13
NS            1024
DS            4
SWH           24038.461 Hz
FIDRES        0.366798 Hz
AQ            1.3631988 sec
RG            185.43
DW            20.800 usec
DE            6.50 usec
TE            298.5 K
D1            2.00000000 sec
D11           0.03000000 sec
TD0           1

===== CHANNEL f1 =====
SFO1          100.6228293 MHz
NUC1          13C
P1            9.50 usec
SI            32768
SF            100.6127690 MHz
WDW           EM
SSB           0
LB            1.00 Hz
GB            0
PC            1.40
  
```

5ba and 7ba

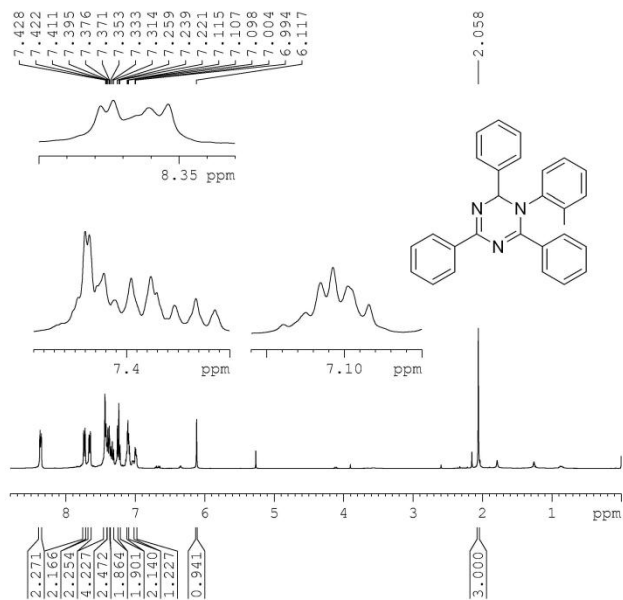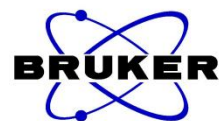

```

NAME          2018041203
EXPNO         10
PROCNO        1
Date_         20180413
Time          2.34
INSTRUM       spect
PROBHD        5 mm PABBO BB/
PULPROG       zg30
TD            65536
SOLVENT       CDC13
NS            16
DS            2
SWH           8012.820 Hz
FIDRES        0.122266 Hz
AQ            4.0894966 sec
RG            34.32
DW            62.400 usec
DE            6.50 usec
TE            297.8 K
D1            1.00000000 sec
TD0           1

===== CHANNEL f1 =====
SFO1          400.1324710 MHz
NUC1          1H
P1            9.70 usec
SI            65536
SF            400.1300189 MHz
WDW           EM
SSB           0
LB            0.30 Hz
GB            0
PC            1.00
  
```

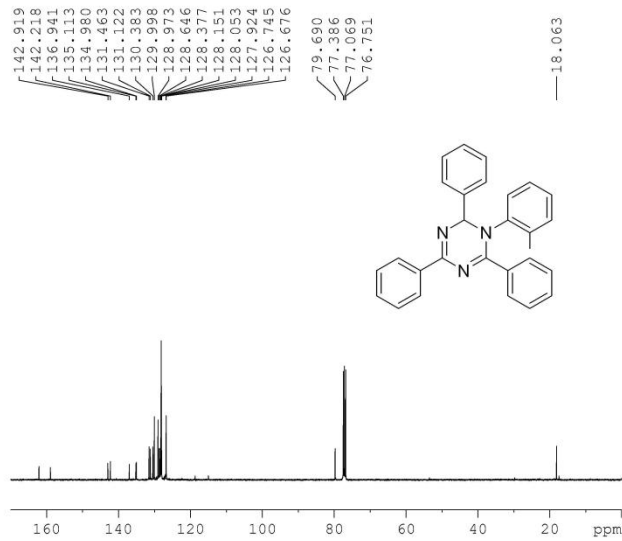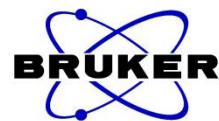

```

NAME          2018041203
EXPNO         11
PROCNO        1
Date_         20180413
Time          3.33
INSTRUM       spect
PROBHD        5 mm PABBO BB/
PULPROG       zgpg30
TD            65536
SOLVENT       CDC13
NS            1024
DS            4
SWH           24038.461 Hz
FIDRES        0.366798 Hz
AQ            1.3631988 sec
RG            185.43
DW            20.800 usec
DE            6.50 usec
TE            298.5 K
D1            2.00000000 sec
D11           0.03000000 sec
TD0           1

===== CHANNEL f1 =====
SFO1          100.6228293 MHz
NUC1          13C
P1            9.50 usec
SI            32768
SF            100.6127690 MHz
WDW           EM
SSB           0
LB            1.00 Hz
GB            0
PC            1.40

```

5ca and 7ca

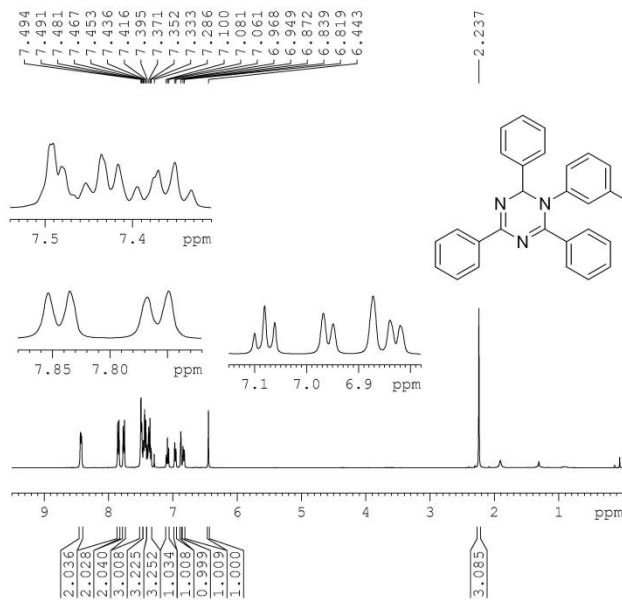

```

NAME          29
EXPNO         1
PROCNO        1
Date_         20180326
Time          15.07
INSTRUM       spect
PROBHD        5 mm PABBO BB-
PULPROG       zg30
TD            65536
SOLVENT       CDC13
NS            8
DS            0
SWH           8223.685 Hz
FIDRES        0.125483 Hz
AQ            3.9846387 sec
RG            71.8
DW            60.800 usec
DE            6.50 usec
TE            291.6 K
D1            1.00000000 sec
TD0           1

===== CHANNEL f1 =====
NUC1          1H
P1            14.00 usec
PL1          -3.13 dB
PL1W         20.50172997 W
SFO1          400.1324710 MHz
SI            32768
SF            400.1300000 MHz
WDW           EM
SSB           0
LB            0.30 Hz
GB            0

```

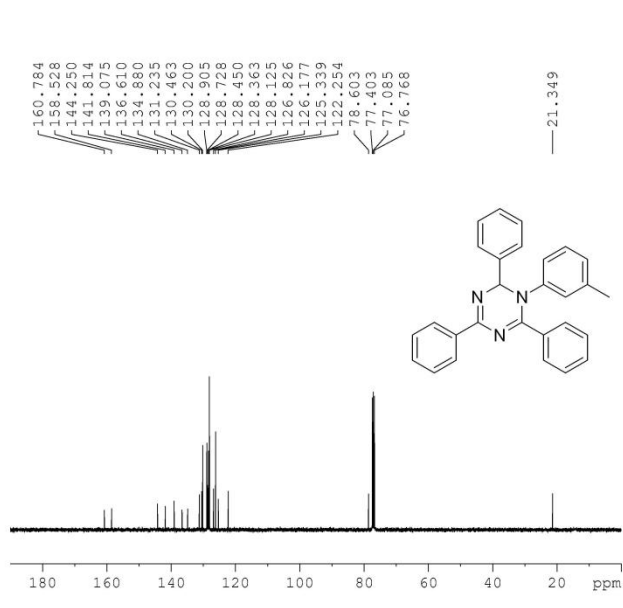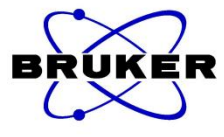

```

NAME          29
EXPNO         2
PROCNO        1
Date_         20180326
Time          15.17
INSTRUM       spect
PROBHHD       5 mm PABBO BB-
PULPROG       zgpg30
TD            65536
SOLVENT       CDC13
NS            160
DS            4
SWH           24038.461 Hz
FIDRES        0.366798 Hz
AQ            1.3631988 sec
RG            32800
DW            20.800 usec
DE            6.50 usec
TE            293.4 K
D1            2.00000000 sec
D11           0.03000000 sec
TD0           1

===== CHANNEL f1 =====
NUC1          13C
P1            10.00 usec
PL1           -2.04 dB
PL1W          55.04534149 W
SFO1          100.6238364 MHz

===== CHANNEL f2 =====
CPDPRG2       waltz16
NUC2          1H
PCPD2         80.00 usec

```

5da and 7da

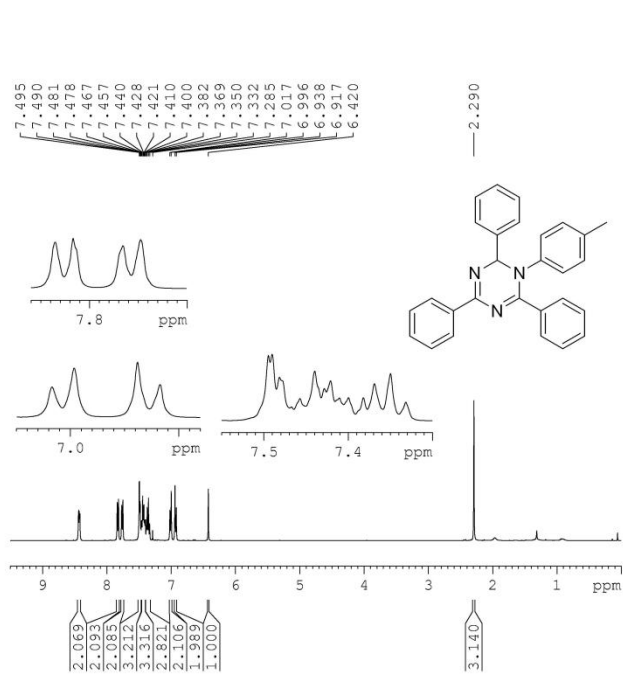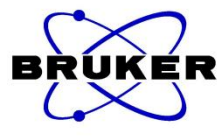

```

NAME          30
EXPNO         1
PROCNO        1
Date_         20180326
Time          15.20
INSTRUM       spect
PROBHHD       5 mm PABBO BB-
PULPROG       zg30
TD            65536
SOLVENT       CDC13
NS            8
DS            0
SWH           8223.685 Hz
FIDRES        0.125483 Hz
AQ            3.9846387 sec
RG            57
DW            60.800 usec
DE            6.50 usec
TE            291.8 K
D1            1.00000000 sec
TD0           1

===== CHANNEL f1 =====
NUC1          1H
P1            14.00 usec
PL1           -3.13 dB
PL1W          20.50172997 W
SFO1          400.1324710 MHz
SI            32768
SF            400.1300000 MHz
WDW           EM
SSB            0
LB            0.30 Hz
GB            0

```

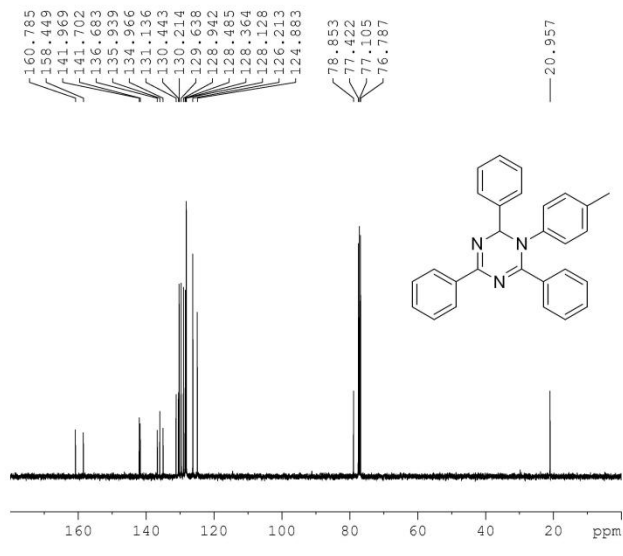

```

NAME          30
EXPNO         2
PROCNO        1
Date_         20180326
Time          15.30
INSTRUM       spect
PROBHHD       5 mm PABBO BB-
PULPROG       zgpg30
TD            65536
SOLVENT       CDCl3
NS            168
DS            4
SWH           24038.461 Hz
FIDRES        0.366798 Hz
AQ            1.3631988 sec
RG            32800
DW            20.800 usec
DE            6.50 usec
TE            293.3 K
D1            2.00000000 sec
D11           0.03000000 sec
TD0           1

===== CHANNEL f1 =====
NUC1          13C
P1            10.00 usec
PL1           -2.04 dB
PL1W          55.04534149 W
SF01          100.6238364 MHz

===== CHANNEL f2 =====
CPDPRG2       waltz16
NUC2          1H
PCPD2         80.00 usec

```

### 5ea and 7ea

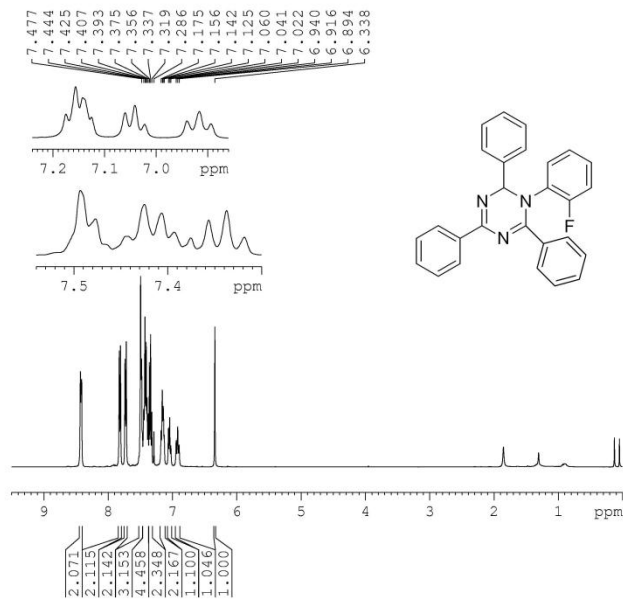

```

NAME          49
EXPNO         1
PROCNO        1
Date_         20180326
Time          15.34
INSTRUM       spect
PROBHHD       5 mm PABBO BB-
PULPROG       zg30
TD            65536
SOLVENT       CDCl3
NS            8
DS            0
SWH           8223.685 Hz
FIDRES        0.125483 Hz
AQ            3.9846387 sec
RG            71.8
DW            60.800 usec
DE            6.50 usec
TE            291.7 K
D1            1.00000000 sec
TD0           1

===== CHANNEL f1 =====
NUC1          1H
P1            14.00 usec
PL1           -3.13 dB
PL1W          20.50172997 W
SF01          400.1324710 MHz
SI            32768
SF            400.1300000 MHz
WDW           EM
SSB           0
LB            0.30 Hz
GB            0

```

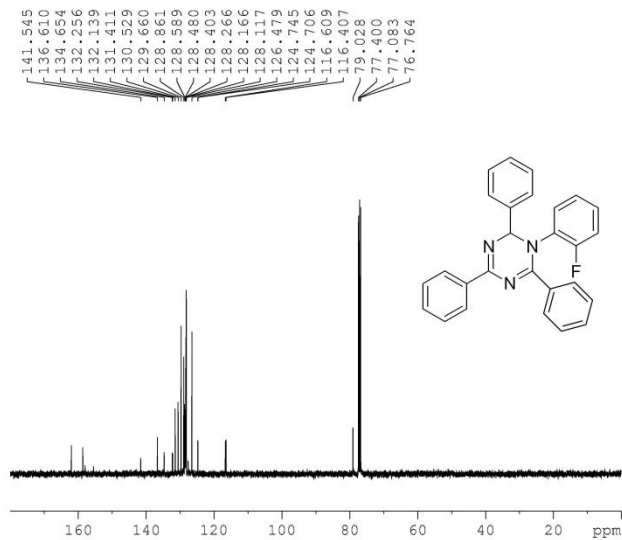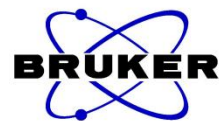

```

NAME          49
EXPNO         2
PROCNO        1
Date_         20180326
Time          15.45
INSTRUM       spect
PROBHHD       5 mm PABBO BB-
PULPROG       zgpg30
TD            65536
SOLVENT       CDC13
NS            179
DS            4
SWH           24038.461 Hz
FIDRES        0.366798 Hz
AQ            1.3631988 sec
RG            32800
DW            20.800 usec
DE            6.50 usec
TE            293.6 K
D1            2.00000000 sec
D11           0.03000000 sec
TD0           1

===== CHANNEL f1 =====
NUC1          13C
P1            10.00 usec
PL1           -2.04 dB
PL1W          55.04534149 W
SFO1          100.62383364 MHz

===== CHANNEL f2 =====
CPDPRG2       waltz16
NUC2          1H
PCPD2         80.00 usec

```

5fa and 7fa

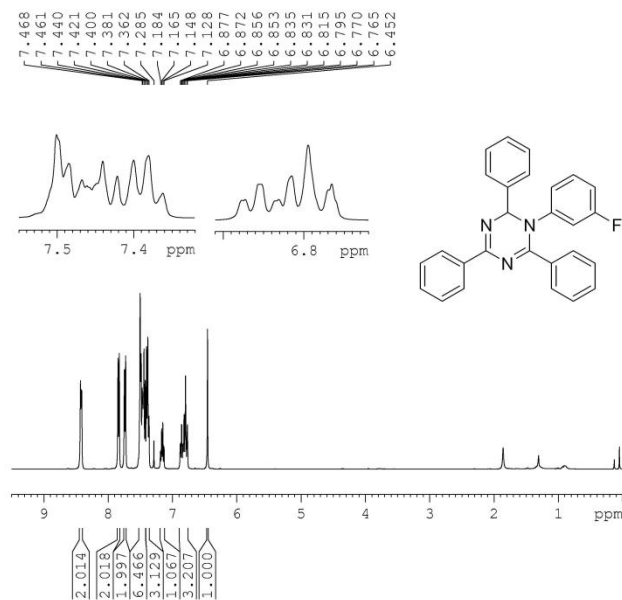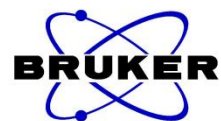

```

NAME          50
EXPNO         1
PROCNO        1
Date_         20180326
Time          15.49
INSTRUM       spect
PROBHHD       5 mm PABBO BB-
PULPROG       zg30
TD            65536
SOLVENT       CDC13
NS            8
DS            0
SWH           8223.685 Hz
FIDRES        0.125483 Hz
AQ            3.9846387 sec
RG            71.8
DW            60.800 usec
DE            6.50 usec
TE            291.9 K
D1            1.00000000 sec
TD0           1

===== CHANNEL f1 =====
NUC1          1H
P1            14.00 usec
PL1           -3.13 dB
PL1W          20.50172997 W
SFO1          400.1324710 MHz
SI            32768
SF            400.1300000 MHz
WDW           EM
SSB           0
LB            0.30 Hz
GB            0

```

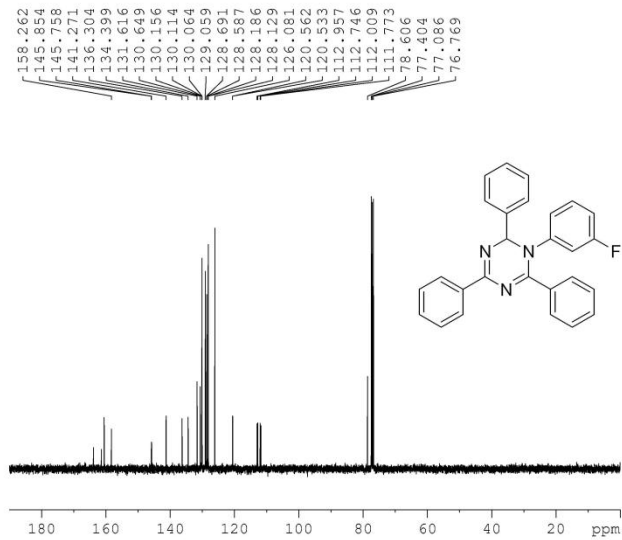

```

NAME          50
EXPNO         2
PROCNO        1
Date_         20180326
Time          15.56
INSTRUM       spect
PROBHHD       5 mm PABBO BB-
PULPROG       zgpg30
TD            65536
SOLVENT       CDCl3
NS            112
DS            4
SWH           24038.461 Hz
FIDRES        0.366798 Hz
AQ            1.3631988 sec
RG            32800
DW            20.800 usec
DE            6.50 usec
TE            293.3 K
D1            2.00000000 sec
D11           0.03000000 sec
TD0           1
  
```

```

===== CHANNEL f1 =====
NUC1          13C
P1            10.00 usec
PL1           -2.04 dB
PL1W          55.04534149 W
SFO1          100.6238364 MHz
  
```

```

===== CHANNEL f2 =====
CPDPRG2       waltz16
NUC2          1H
PCPD2         80.00 usec
  
```

### 5ga and 7ga

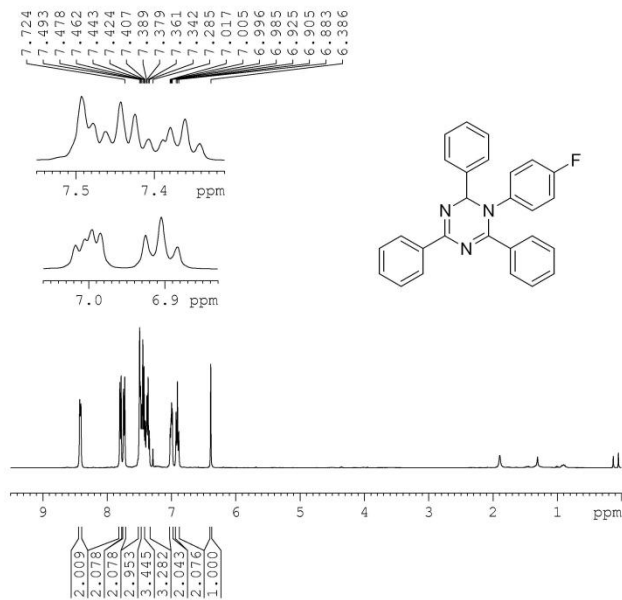

```

NAME          51
EXPNO         1
PROCNO        1
Date_         20180326
Time          16.38
INSTRUM       spect
PROBHHD       5 mm PABBO BB-
PULPROG       zg30
TD            65536
SOLVENT       CDCl3
NS            8
DS            0
SWH           8223.685 Hz
FIDRES        0.125483 Hz
AQ            3.9846387 sec
RG            71.8
DW            60.800 usec
DE            6.50 usec
TE            292.6 K
D1            1.00000000 sec
TD0           1
  
```

```

===== CHANNEL f1 =====
NUC1          1H
P1            14.00 usec
PL1           -3.13 dB
PL1W          20.50172997 W
SFO1          400.1324710 MHz
SI            32768
SF            400.1300000 MHz
WDW           EM
SSB           0
LB            0.30 Hz
GB            0
  
```

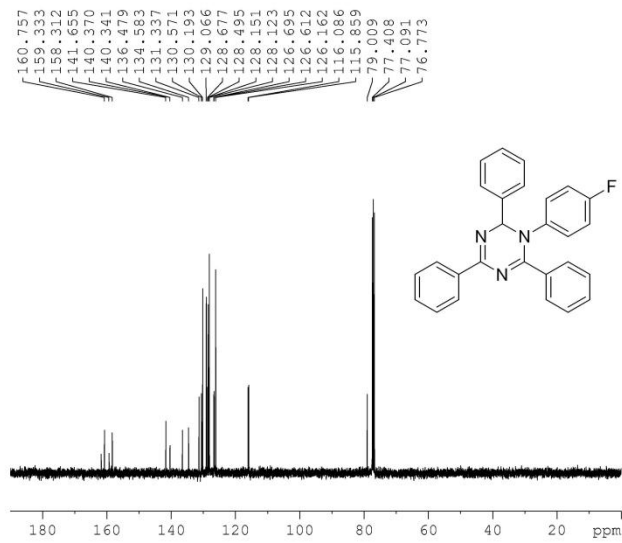

```

NAME          51
EXPNO         2
PROCNO        1
Date_         20180326
Time          16.43
INSTRUM       spect
PROBHHD       5 mm PABBO BB-
PULPROG       zgpg30
TD            65536
SOLVENT       CDCl3
NS            73
DS            4
SWH           24038.461 Hz
FIDRES        0.366798 Hz
AQ            1.3631988 sec
RG            32800
DW            20.800 usec
DE            6.50 usec
TE            293.8 K
D1            2.00000000 sec
D11           0.03000000 sec
TD0           1

===== CHANNEL f1 =====
NUC1          13C
P1            10.00 usec
PL1           -2.04 dB
PL1W          55.04534149 W
SF01          100.6238364 MHz

===== CHANNEL f2 =====
CPDPRG2       waltz16
NUC2          1H
PCPD2         80.00 usec

```

### 5ha and 7ia

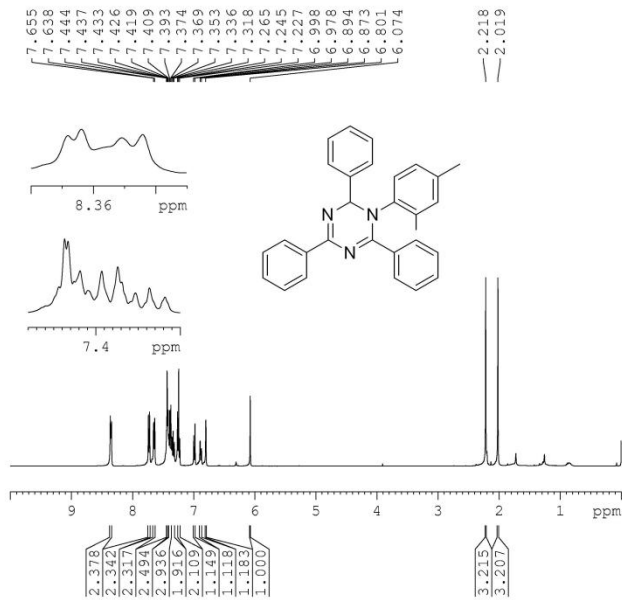

```

NAME          2018-04-13 tyut-lx-
EXPNO         10
PROCNO        1
Date_         20180413
Time          22.57
INSTRUM       spect
PROBHHD       5 mm PABBO BB/
PULPROG       zg30
TD            65536
SOLVENT       CDCl3
NS            16
DS            2
SWH           8012.820 Hz
FIDRES        0.122266 Hz
AQ            4.0894966 sec
RG            57.76
DW            62.400 usec
DE            6.50 usec
TE            297.6 K
D1            1.00000000 sec
TD0           1

===== CHANNEL f1 =====
SF01          400.1324710 MHz
NUC1          1H
P1            9.70 usec
SI            65536
SF            400.1300160 MHz
WDW           EM
SSB           0
LB            0.30 Hz
GB            0
PC            1.00

```



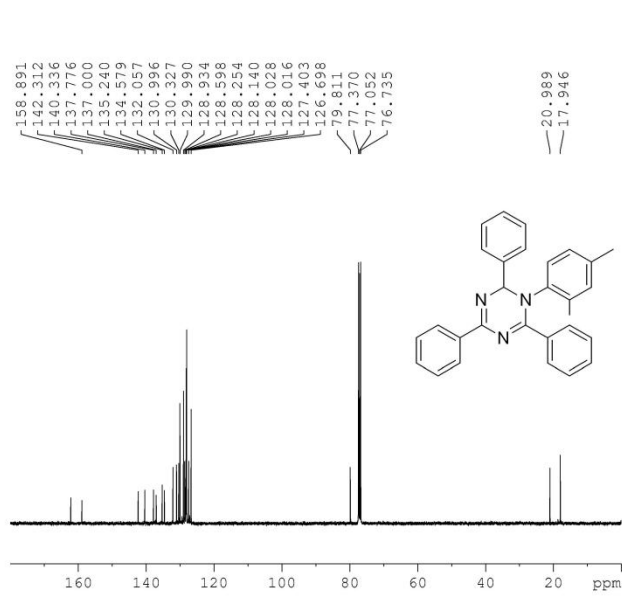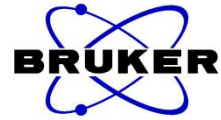

```

NAME      2018-04-13 tyut-lx-
EXPNO     11
PROCNO    1
Date_     20180413
Time      23.56
INSTRUM   spect
PROBHD    5 mm PABBO BB/
PULPROG   zgpg30
TD         65536
SOLVENT   CDCl3
NS         1024
DS         4
SWH       24038.461 Hz
FIDRES    0.366798 Hz
AQ         1.3631988 sec
RG         185.43
DW         20.800 usec
DE         6.50 usec
TE         298.3 K
D1         2.00000000 sec
D11        0.03000000 sec
TD0        1

```

```

===== CHANNEL f1 =====
SFO1     100.6228293 MHz
NUC1      13C
P1        9.50 usec
SI        32768
SF        100.6127690 MHz
WDW       EM
SSB       0
LB        1.00 Hz
GB        0
PC        1.40

```

### 5ia and 7ha

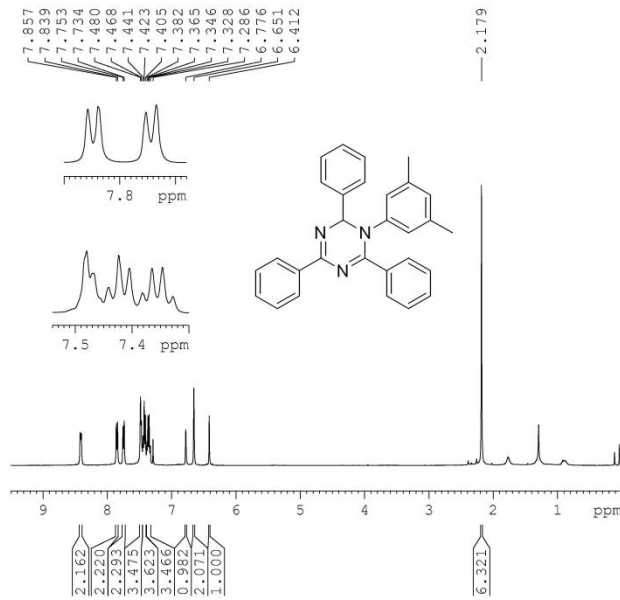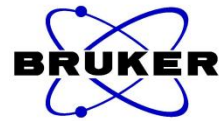

```

NAME      52
EXPNO     1
PROCNO    1
Date_     20180326
Time      16.48
INSTRUM   spect
PROBHD    5 mm PABBO BB-
PULPROG   zg30
TD         65536
SOLVENT   CDCl3
NS         8
DS         0
SWH       8223.685 Hz
FIDRES    0.125483 Hz
AQ         3.9846387 sec
RG         90.5
DW         60.800 usec
DE         6.50 usec
TE         292.1 K
D1         1.00000000 sec
TD0        1

```

```

===== CHANNEL f1 =====
NUC1      1H
P1        14.00 usec
PL1       -3.13 dB
PL1W      20.50172997 W
SFO1     400.1324710 MHz
SI        32768
SF        400.1300000 MHz
WDW       EM
SSB       0
LB        0.30 Hz
GB        0

```

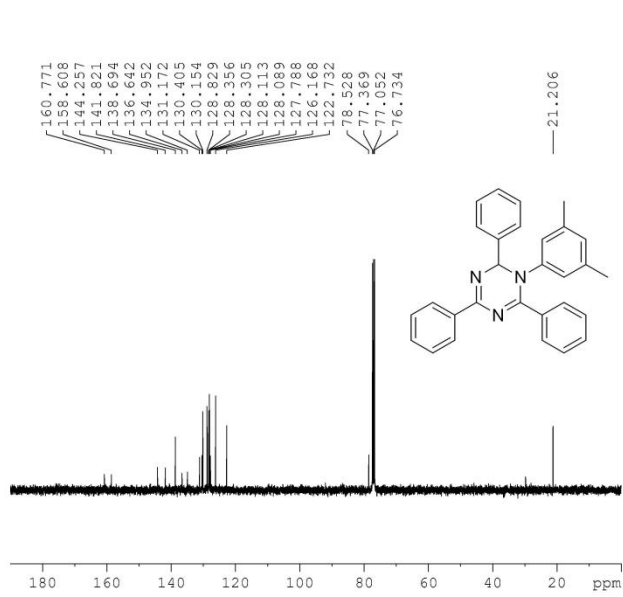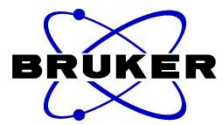

```

NAME          52
EXPNO         2
PROCNO        1
Date_         20180326
Time          16.56
INSTRUM       spect
PROBHD        5 mm PABBO BB-
PULPROG       zgpg30
TD            65536
SOLVENT       CDC13
NS            137
DS            4
SWH           24038.461 Hz
FIDRES        0.366798 Hz
AQ            1.3631988 sec
RG            32800
DW            20.800 usec
DE            6.50 usec
TE            293.8 K
D1            2.00000000 sec
D11           0.03000000 sec
TD0           1

===== CHANNEL f1 =====
NUC1          13C
P1            10.00 usec
PL1           -2.04 dB
PL1W          55.04534149 W
SFO1          100.6238364 MHz

===== CHANNEL f2 =====
CPDPRG2       waltz16
NUC2          1H
PCPD2         80.00 usec

```

5ja

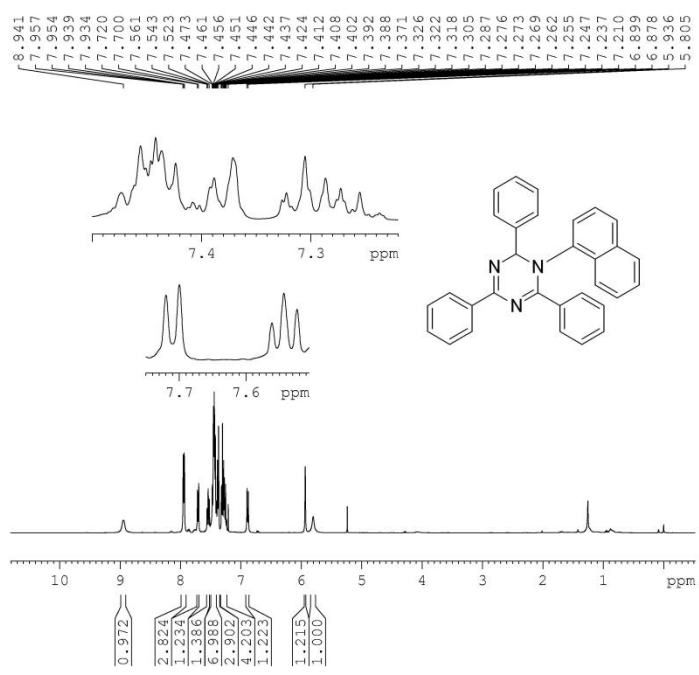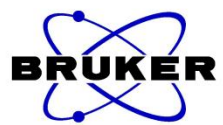

```

NAME          2019-04-01 tyut-lx-(
EXPNO         10
PROCNO        1
Date_         20190402
Time          18.03
INSTRUM       spect
PROBHD        5 mm PABBO BB/
PULPROG       zg30
TD            65536
SOLVENT       CDC13
NS            16
DS            2
SWH           8012.820 Hz
FIDRES        0.122266 Hz
AQ            4.0894966 sec
RG            34.32
DW            62.400 usec
DE            6.50 usec
TE            295.4 K
D1            1.00000000 sec
TD0           1

===== CHANNEL f1 =====
SFO1          400.1324710 MHz
NUC1          1H
P1            9.59 usec
SI            65536
SF            400.1300299 MHz
WDW           EM
SSB           0
LB            0.30 Hz
GB            0
PC            1.00

```

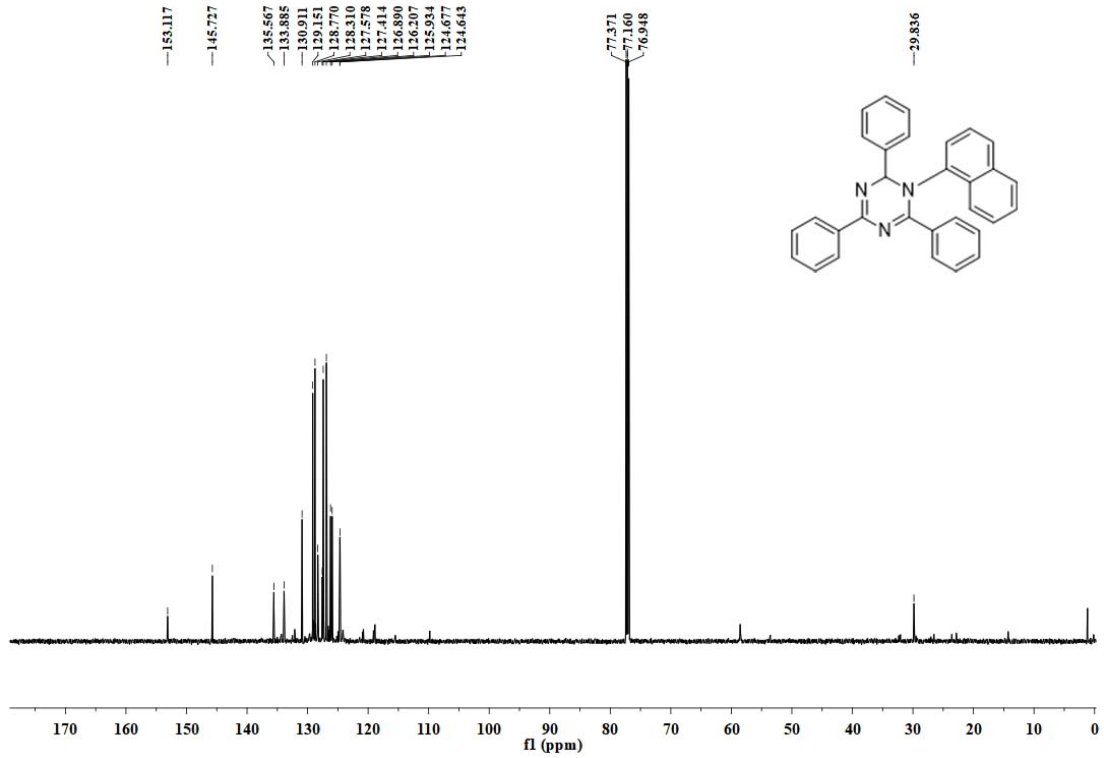

5ka and 7ka

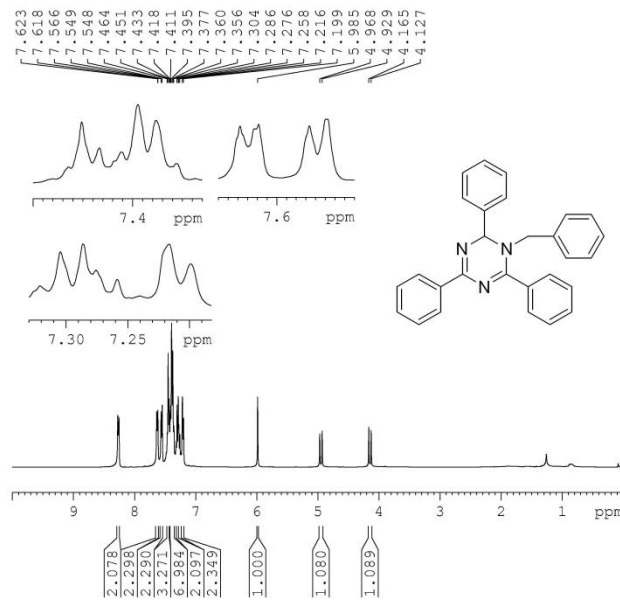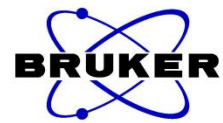

```

NAME      2018-04-13 tyut-lx-
EXPNO     10
PROCNO    1
Date_     20180413
Time      16.38
INSTRUM   spect
PROBHD    5 mm PABBO BB/
PULPROG   zg30
TD         65536
SOLVENT   CDCl3
NS         16
DS         2
SWH        8012.820 Hz
FIDRES     0.122266 Hz
AQ         4.0894966 sec
RG         34.32
DW         62.400 usec
DE         6.50 usec
TE         297.4 K
D1         1.00000000 sec
TD0        1

===== CHANNEL f1 =====
SFO1      400.1324710 MHz
NUC1       1H
P1         9.70 usec
SI         65536
SF         400.1300251 MHz
WDW        EM
SSB        0
LB         0.30 Hz
GB         0
PC         1.00
  
```

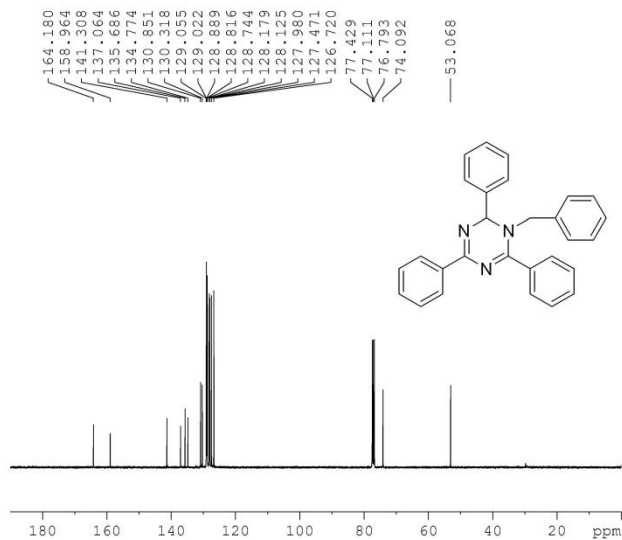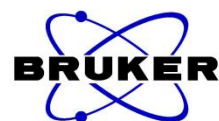

```

NAME      2018-04-13 tyut-lx-
EXPNO    11
PROCNO   1
Date_    20180413
Time     17.37
INSTRUM  spect
PROBHD   5 mm PABBO BB/
PULPROG  zgpg30
TD       65536
SOLVENT  CDCl3
NS       1024
DS       4
SWH      24038.461 Hz
FIDRES   0.366798 Hz
AQ       1.3631988 sec
RG       185.43
DW       20.800 usec
DE       6.50 usec
TE       298.4 K
D1       2.00000000 sec
D11      0.03000000 sec
TD0     1

```

```

===== CHANNEL f1 =====
SFO1    100.6228293 MHz
NUC1    13C
P1      9.50 usec
SI      32768
SF      100.6127690 MHz
WDW     EM
SSB     0
LB      1.00 Hz
GB      0
PC      1.40

```

5la

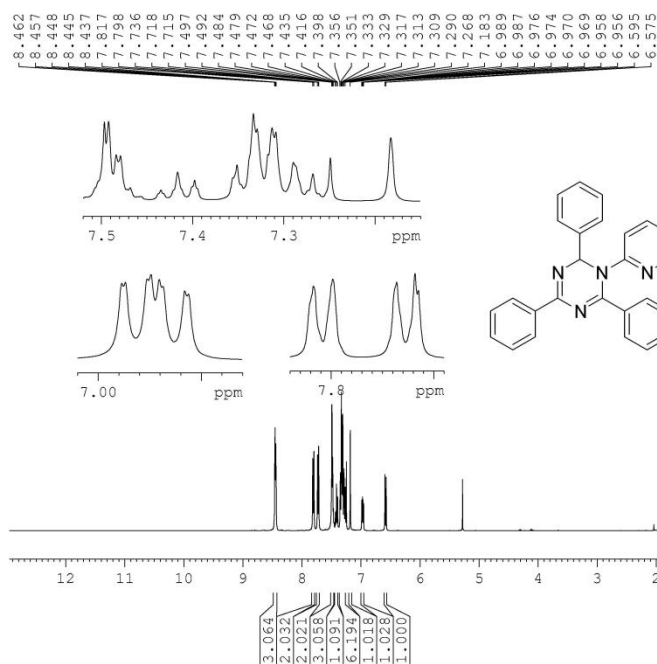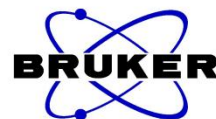

```

NAME      2019-04-03 tyut-lx-2
EXPNO    10
PROCNO   1
Date_    20190403
Time     21.32
INSTRUM  spect
PROBHD   5 mm PABBO BB/
PULPROG  zg30
TD       65536
SOLVENT  CDCl3
NS       16
DS       2
SWH      8012.820 Hz
FIDRES   0.122266 Hz
AQ       4.0894966 sec
RG       60.71
DW       62.400 usec
DE       6.50 usec
TE       296.1 K
D1       1.00000000 sec
TD0     1

```

```

===== CHANNEL f1 =====
SFO1    400.1324710 MHz
NUC1    1H
P1      9.59 usec
SI      65536
SF      400.1300143 MHz
WDW     EM
SSB     0
LB      0.30 Hz
GB      0
PC      1.00

```

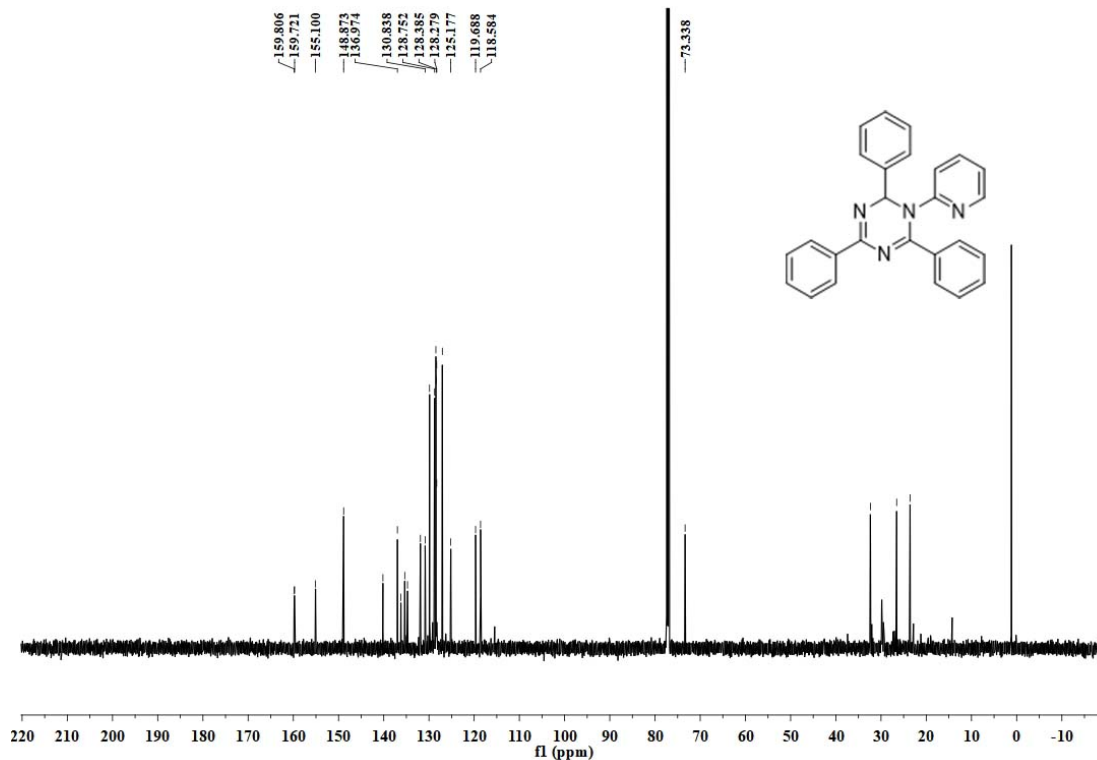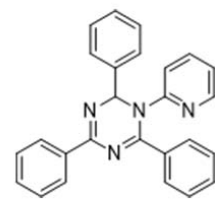

5ma and 7la

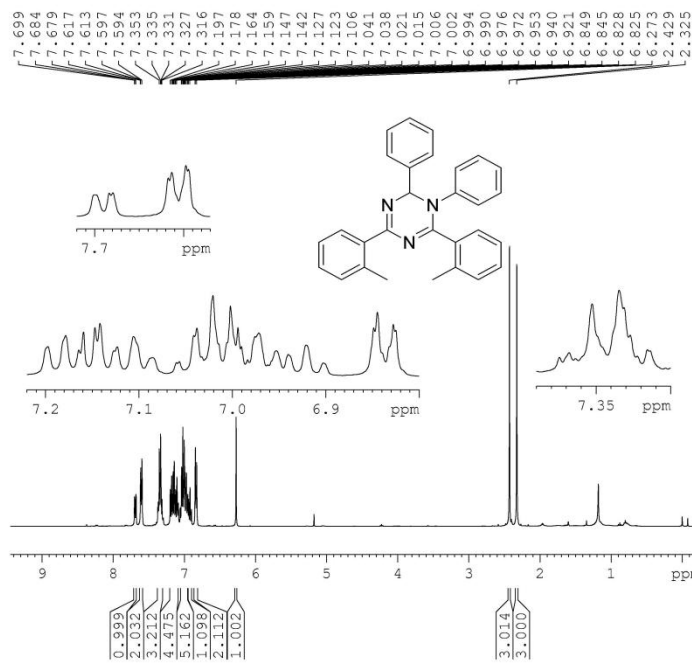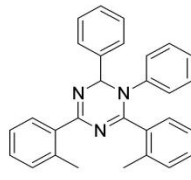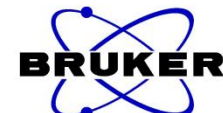

```

NAME      2019-03-27 tyut-lx-c
EXPNO    10
PROCNO   1
Date_    20190328
Time     2.34
INSTRUM  spect
PROBHD   5 mm PABBO BB/
PULPROG  zg30
TD       65536
SOLVENT  CDCl3
NS       16
DS       2
SWH      8012.820 Hz
FIDRES   0.122266 Hz
AQ       4.0894966 sec
RG       34.32
DW       62.400 usec
DE       6.50 usec
TE       295.8 K
D1       1.00000000 sec
TD0      1

===== CHANNEL f1 =====
SFO1    400.1324710 MHz
NUC1    1H
P1      9.59 usec
SI      65536
SF      400.1300503 MHz
WDW     EM
SSB     0
LB      0.30 Hz
GB      0
PC      1.00
  
```

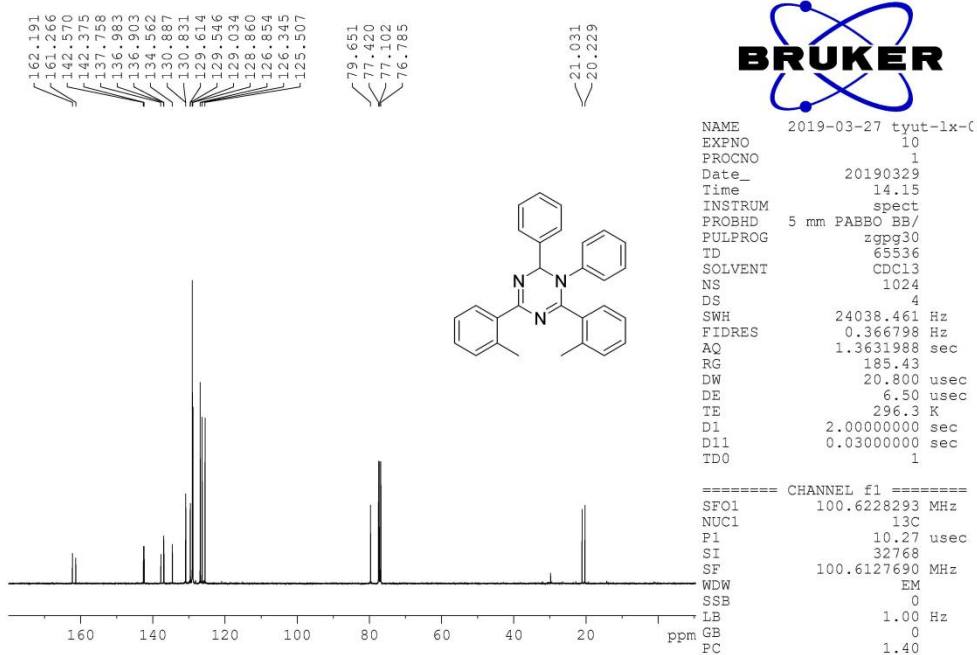

5na and 7ma

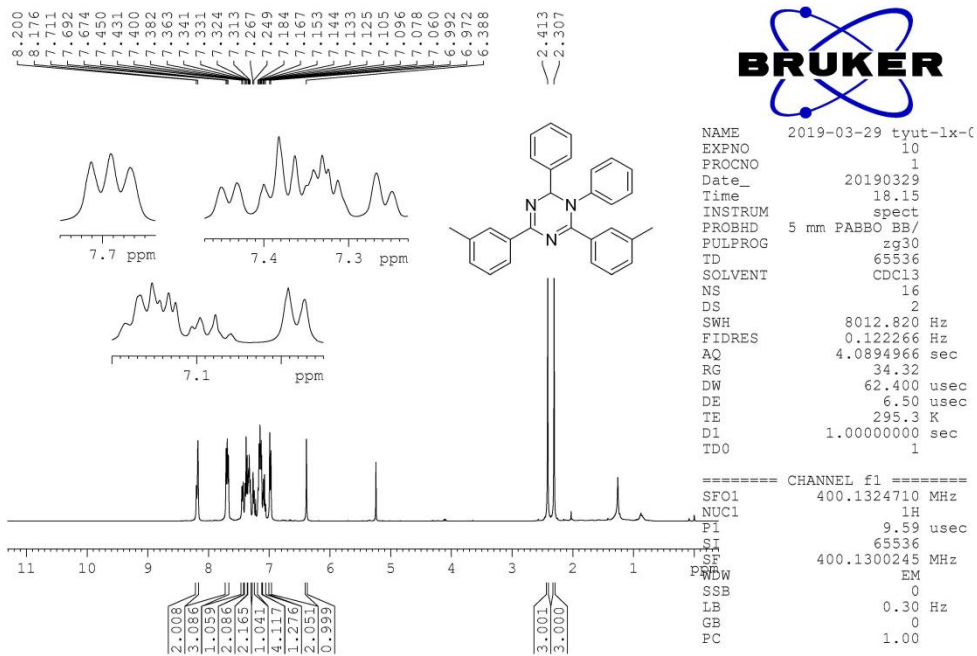

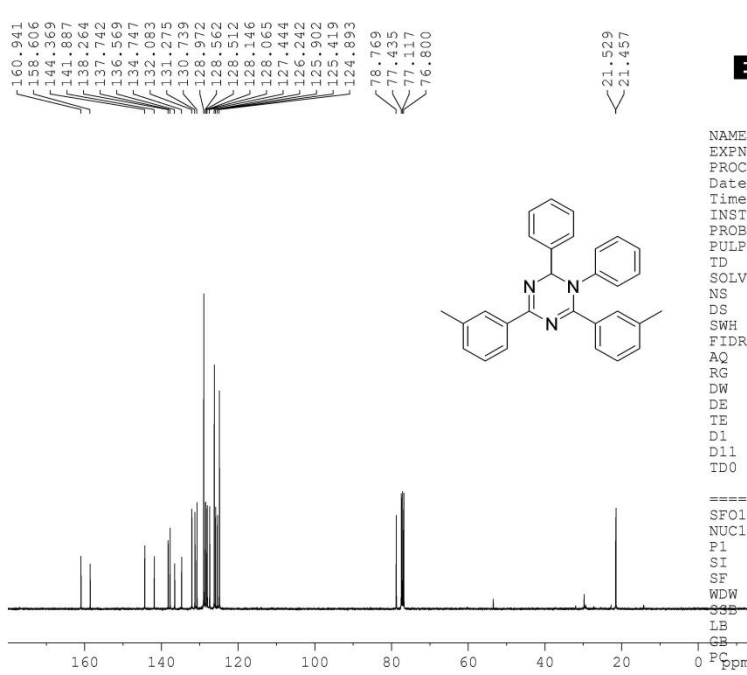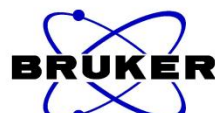

```

NAME      2019-03-31 tyut-lx-
EXPNO    10
PROCNO   1
Date_    20190331
Time     16.43
INSTRUM  spect
PROBHD   5 mm PABBO BB/
PULPROG  zgpg30
TD       65536
SOLVENT  CDCl3
NS       1024
DS       4
SWH      24038.461 Hz
FIDRES   0.366798 Hz
AQ       1.3631988 sec
RG       185.43
DW       20.800 usec
DE       6.50 usec
TE       295.7 K
D1       2.00000000 sec
D11      0.03000000 sec
TD0      1
  
```

```

===== CHANNEL f1 =====
SFO1    100.6228293 MHz
NUC1     13C
P1      10.27 usec
SI      32768
SF      100.6127690 MHz
WDW     EM
SSB     0
LB      1.00 Hz
GB      0
PC      1.40
  
```

50a and 7na

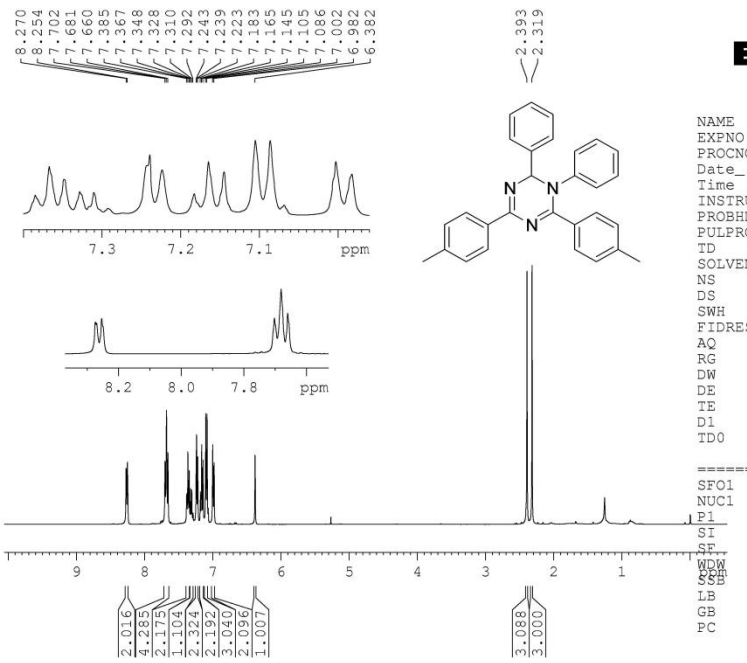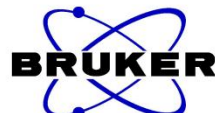

```

NAME      2019-03-27 tyut-lx-
EXPNO    10
PROCNO   1
Date_    20190328
Time     2.30
INSTRUM  spect
PROBHD   5 mm PABBO BB/
PULPROG  zg30
TD       65536
SOLVENT  CDCl3
NS       16
DS       2
SWH      8012.820 Hz
FIDRES   0.122266 Hz
AQ       4.0894966 sec
RG       34.32
DW       62.400 usec
DE       6.50 usec
TE       295.8 K
D1       1.00000000 sec
TD0      1
  
```

```

===== CHANNEL f1 =====
SFO1    400.1324710 MHz
NUC1     1H
P1      9.59 usec
SI      65536
SF      400.1300183 MHz
WDW     EM
SSB     0
LB      0.30 Hz
GB      0
PC      1.00
  
```

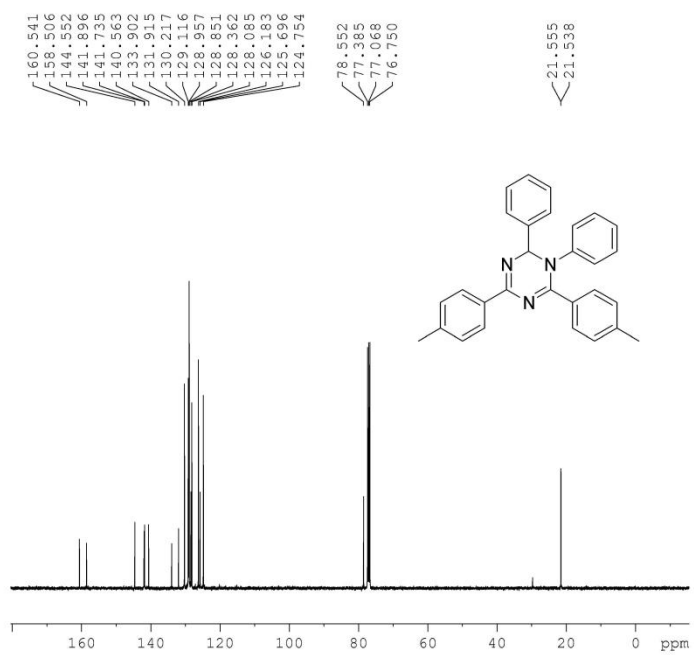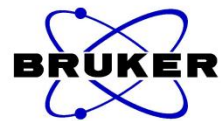

NAME 2019-03-27 tyut-lx-(  
 EXPNO 10  
 PROCNO 1  
 Date\_ 20190329  
 Time 13.14  
 INSTRUM spect  
 PROBHD 5 mm PABBO BB/  
 PULPROG zgpg30  
 TD 65536  
 SOLVENT CDC13  
 NS 1024  
 DS 4  
 SWH 24038.461 Hz  
 FIDRES 0.366798 Hz  
 AQ 1.3631988 sec  
 RG 185.43  
 DW 20.800 usec  
 DE 6.50 usec  
 TE 296.3 K  
 D1 2.00000000 sec  
 D11 0.03000000 sec  
 TD0 1

===== CHANNEL f1 =====  
 SFO1 100.6228293 MHz  
 NUC1 13C  
 P1 10.27 usec  
 SI 32768  
 SF 100.6127690 MHz  
 WDW EM  
 SSB 0  
 LB 1.00 Hz  
 GB 0  
 PC 1.40

5pa

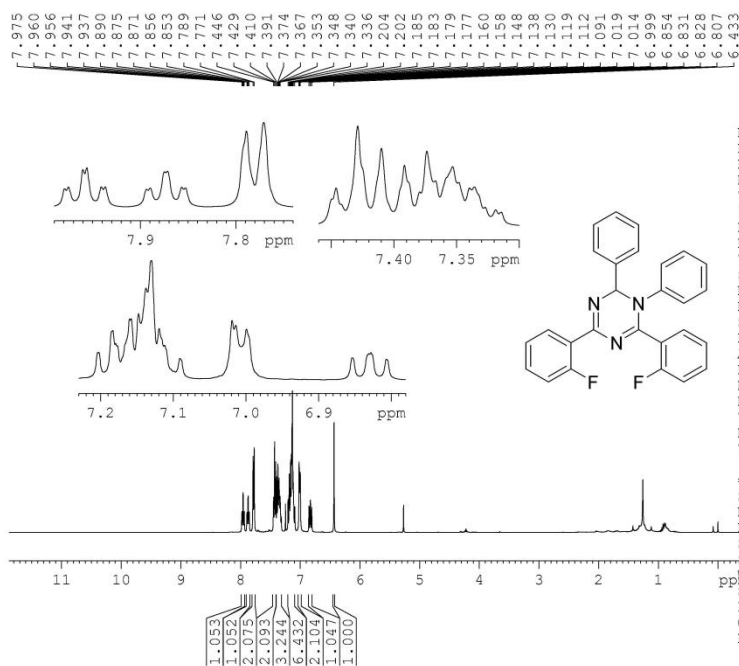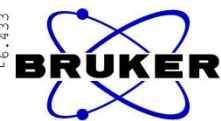

NAME 2019-03-29 tyut-  
 EXPNO 10  
 PROCNO 1  
 Date\_ 20190329  
 Time 18.27  
 INSTRUM spect  
 PROBHD 5 mm PABBO BB/  
 PULPROG zg30  
 TD 65536  
 SOLVENT CDC13  
 NS 16  
 DS 2  
 SWH 8012.820 H:  
 FIDRES 0.122266 H:  
 AQ 4.0894966 se  
 RG 34.32  
 DW 62.400 us  
 DE 6.50 us  
 TE 295.3 K  
 D1 1.00000000 se  
 TD0 1

===== CHANNEL f1 =====  
 SFO1 400.1324710 M  
 NUC1 1H  
 P1 9.59 us  
 SI 65536  
 SF 400.1300153 M  
 WDW EM  
 SSB 0  
 LB 0.30 H:  
 GB 0  
 PC 1.00



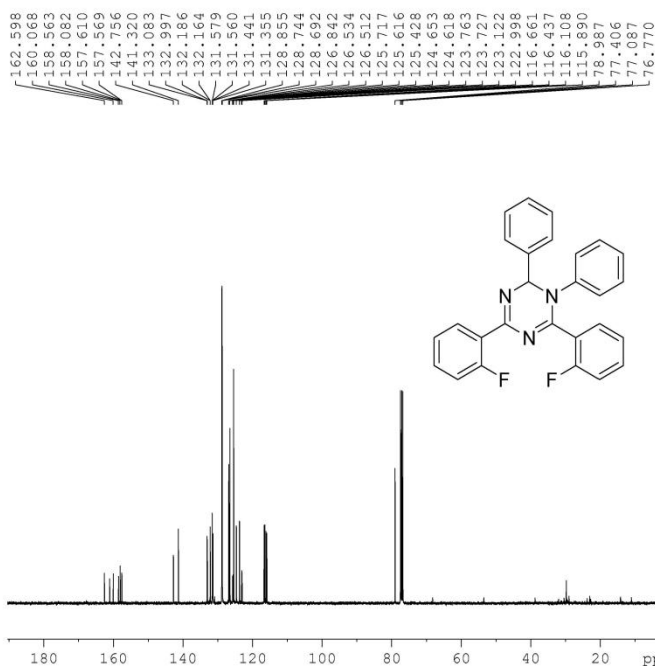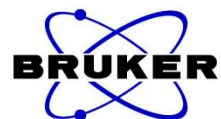

```

NAME      2019-03-31 tyut-ix-0
EXPNO     10
PROCNO    1
Date_     20190331
Time      22.05
INSTRUM   spect
PROBHD    5 mm PABBO BB/
PULPROG   zgpg30
TD         65536
SOLVENT   CDCl3
NS         1024
DS         4
SWH        24038.461 Hz
FIDRES     0.366798 Hz
AQ         1.3631988 sec
RG         185.43
DW         20.800 usec
DE         6.50 usec
TE         295.9 K
D1         2.00000000 sec
D11        0.03000000 sec
TD0        1
  
```

```

===== CHANNEL f1 =====
SFO1      100.6228293 MHz
NUC1       13C
P1         10.27 usec
SI         32768
SF         100.6127690 MHz
WDW        EM
SSB        0
LB         1.00 Hz
GB         0
PC         1.40
  
```

### 5qa and 7oa

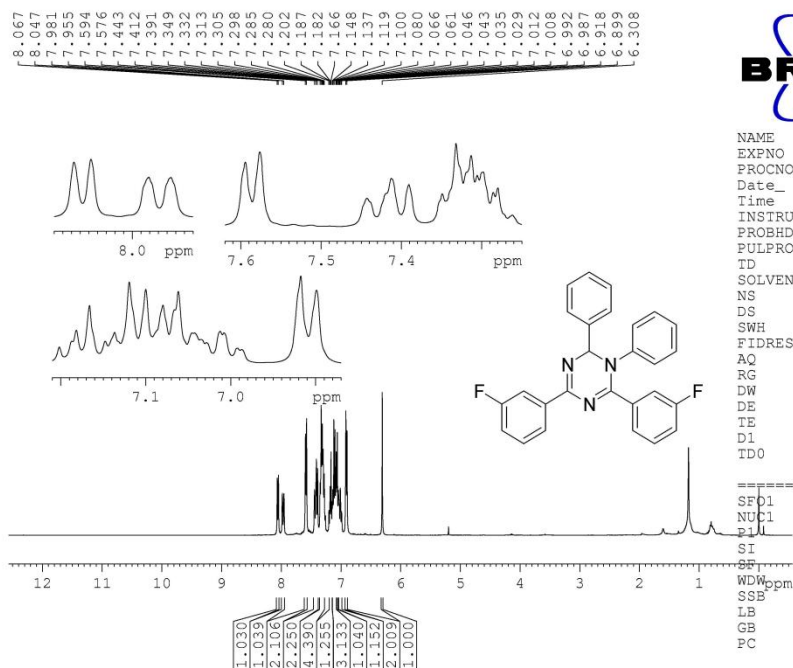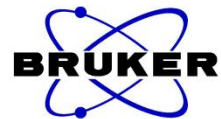

```

NAME      2019-03-29 tyut-
EXPNO     10
PROCNO    1
Date_     20190329
Time      18.23
INSTRUM   spect
PROBHD    5 mm PABBO BB/
PULPROG   zg30
TD         65536
SOLVENT   CDCl3
NS         16
DS         2
SWH        8012.820 H
FIDRES     0.122266 H
AQ         4.0894966 s
RG         34.32
DW         62.400 u
DE         6.50 u
TE         295.3 K
D1         1.00000000 s
TD0        1
  
```

```

===== CHANNEL f1 =====
SFO1      400.1324710 M
NUC1       1H
P1         9.59 u
SI         65536
SF         400.1300476 M
WDW        EM
SSB        0
LB         0.30 H
GB         0
PC         1.00
  
```

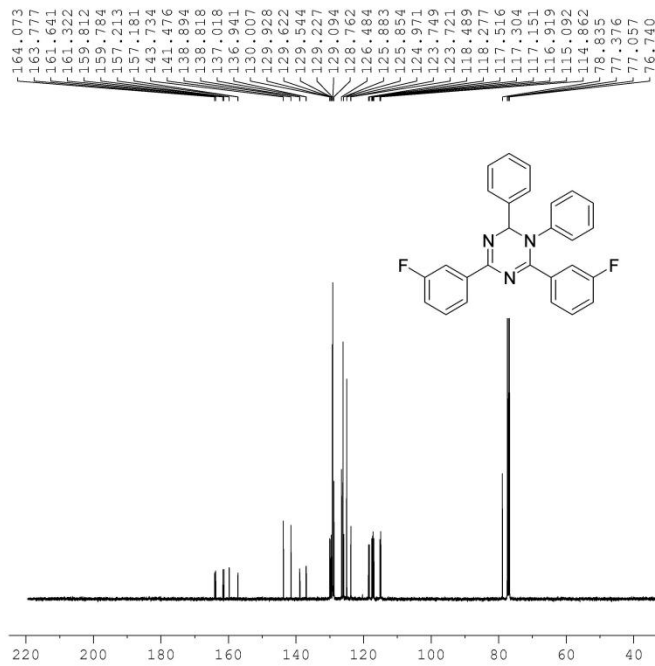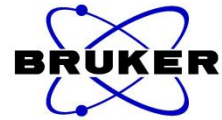

```

NAME      2019-03-31 tyut-
EXPNO    10
PROCNO   1
Date_    20190331
Time     21.03
INSTRUM  spect
PROBHD   5 mm PABBO BB/
PULPROG  zgpg30
TD       65536
SOLVENT  CDC13
NS       1024
DS       4
SWH      24038.461 H
FIDRES   0.366798 H
AQ       1.3631988 s
RG       185.43
DW       20.800 u
DE       6.50 u
TE       295.8 K
D1       2.0000000 s
D11      0.0300000 s
TD0      1
  
```

```

===== CHANNEL f1 =====
SF01    100.6228293 M
NUC1     13C
F1      10.27 u
SI      32768
SF      100.6127690 M
WDW      EM
SSB      0
LB      1.00 H
GB      0
PC      1.40
  
```

### 5ra and 7pa

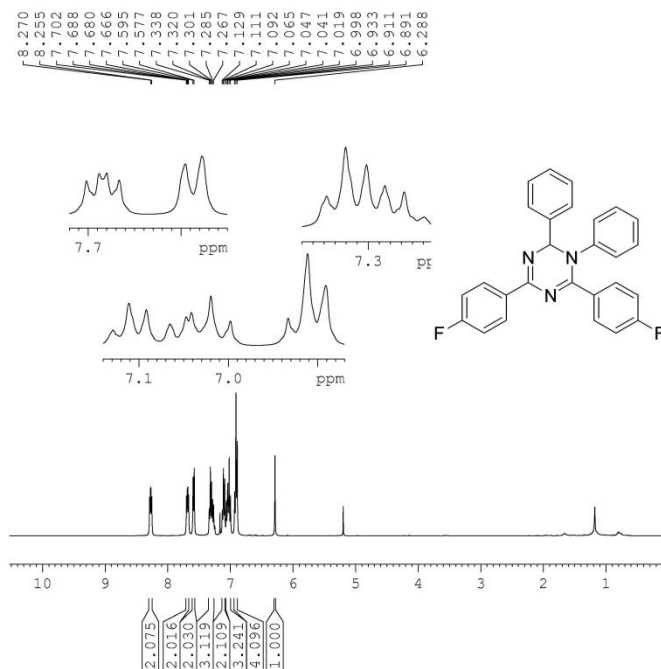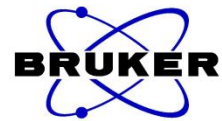

```

NAME      2019-03-29 tyut-lx-(
EXPNO    10
PROCNO   1
Date_    20190329
Time     18.19
INSTRUM  spect
PROBHD   5 mm PABBO BB/
PULPROG  zg30
TD       65536
SOLVENT  CDC13
NS       16
DS       2
SWH      8012.820 Hz
FIDRES   0.122266 Hz
AQ       4.0894966 sec
RG       34.32
DW       62.400 usec
DE       6.50 usec
TE       295.3 K
D1       1.0000000 sec
TD0      1
  
```

```

===== CHANNEL f1 =====
SF01    400.1324710 MHz
NUC1     1H
F1      9.59 usec
SI      65536
SF      400.1300474 MHz
WDW      EM
SSB      0
LB      0.30 Hz
GB      0
PC      1.00
  
```

165.791  
165.738  
163.308  
163.224  
159.834  
157.352  
144.041  
141.703  
132.667  
132.640  
132.415  
132.326  
130.749  
130.719  
130.243  
130.158  
129.163  
129.040  
128.641  
128.228  
126.076  
124.952  
118.752  
115.534  
115.115  
114.900  
78.761  
77.380  
77.063  
76.745



NAME 2019-03-31 tyut-lx-(  
EXPNO 10  
PROCNO 1  
Date\_ 20190331  
Time 20.02  
INSTRUM spect  
PROBHD 5 mm PABBO BB/  
PULPROG zgpg30  
TD 65536  
SOLVENT CDCl3  
NS 1024  
DS 4  
SWH 24038.461 Hz  
FIDRES 0.366798 Hz  
AQ 1.3631988 sec  
RG 185.43  
DW 20.800 usec  
DE 6.50 usec  
TE 295.7 K  
D1 2.00000000 sec  
D11 0.03000000 sec  
TD0 1

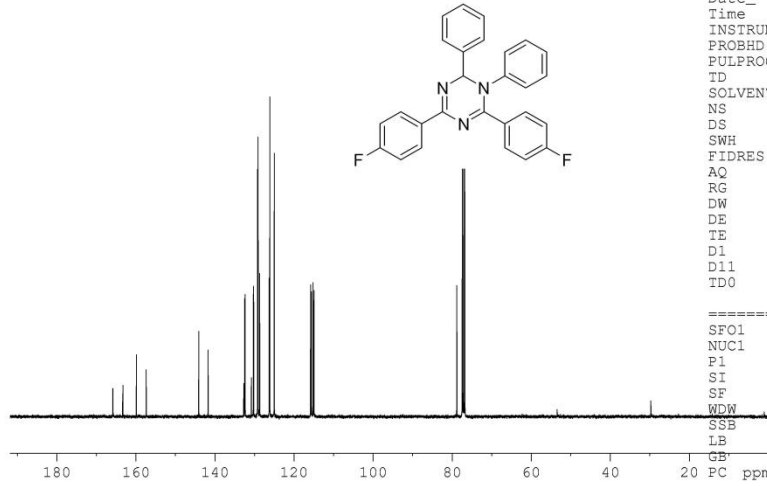

===== CHANNEL f1 =====  
SFO1 100.6228293 MHz  
NUC1 13C  
P1 10.27 usec  
SI 32768  
SF 100.6127690 MHz  
WDW EM  
SSB 0  
LB 1.00 Hz  
GB 0  
PC 1.40

5sa

8.913  
8.893  
8.444  
8.424  
8.216  
8.198  
7.897  
7.877  
7.854  
7.835  
7.767  
7.754  
7.750  
7.734  
7.731  
7.514  
7.510  
7.495  
7.486  
7.480  
7.480  
7.462  
7.455  
7.445  
7.432  
7.426  
7.294  
7.275  
7.255  
7.242  
7.015  
6.984  
6.977  
6.966  
6.955

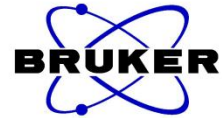

NAME 2019-04-01 tyut-lx-1  
EXPNO 10  
PROCNO 1  
Date\_ 20190402  
Time 18.26  
INSTRUM spect  
PROBHD 5 mm PABBO BB/  
PULPROG zg30  
TD 65536  
SOLVENT CDCl3  
NS 16  
DS 2  
SWH 8012.820 Hz  
FIDRES 0.122266 Hz  
AQ 4.0894966 sec  
RG 57.76  
DW 62.400 usec  
DE 6.50 usec  
TE 295.4 K  
D1 1.00000000 sec  
TD0 1

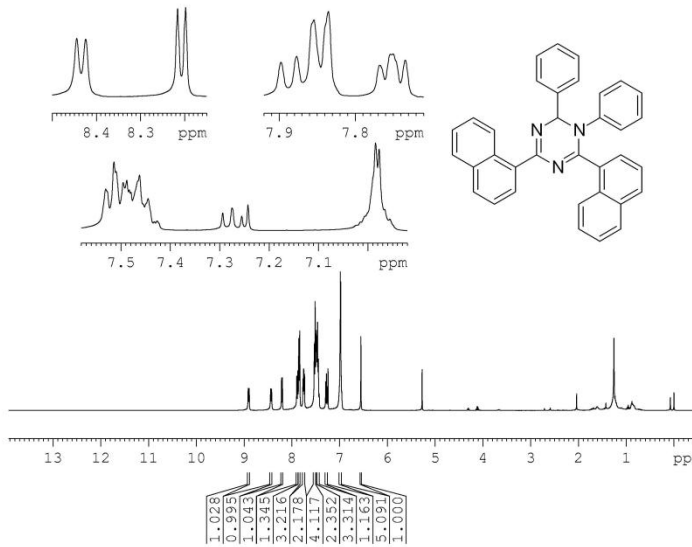

===== CHANNEL f1 =====  
SFO1 400.1324710 MHz  
NUC1 1H  
P1 9.59 usec  
SI 65536  
SF 400.1300171 MHz  
WDW EM  
SSB 0  
LB 0.30 Hz  
GB 0  
PC 1.00

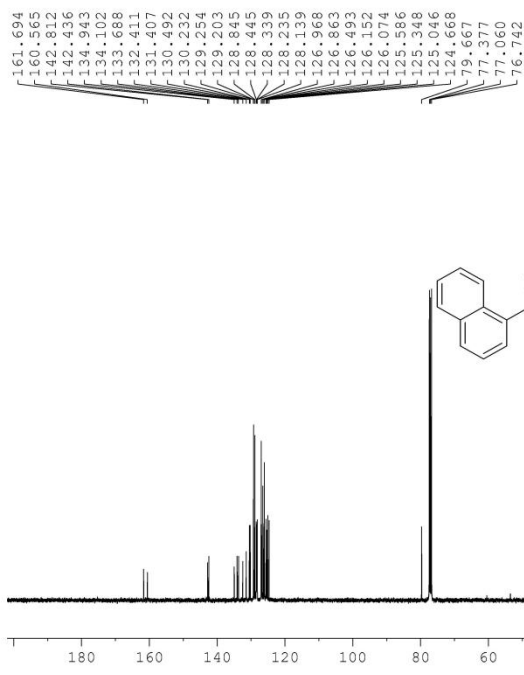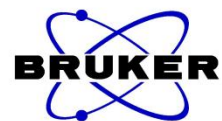

NAME 2019-04-01 tyut-lx-0  
EXPNO 10  
PROCNO 1  
Date\_ 20190403  
Time 23.52  
INSTRUM spect  
PROBHD 5 mm PABBO BB/  
PULPROG zgpg30  
TD 65536  
SOLVENT CDCl3  
NS 1024  
DS 4  
SWH 24038.461 Hz  
FIDRES 0.366798 Hz  
AQ 1.3631988 sec  
RG 185.43  
DW 20.800 usec  
DE 6.50 usec  
TE 297.2 K  
D1 2.00000000 sec  
D11 0.03000000 sec  
TD0 1

===== CHANNEL f1 =====  
SFO1 100.6228293 MHz  
NUC1 13C  
P1 10.27 usec  
SI 32768  
SF 100.6127690 MHz  
WDW EM  
SSB 0  
LB 1.00 Hz  
GB 0  
PC 1.40

5ta

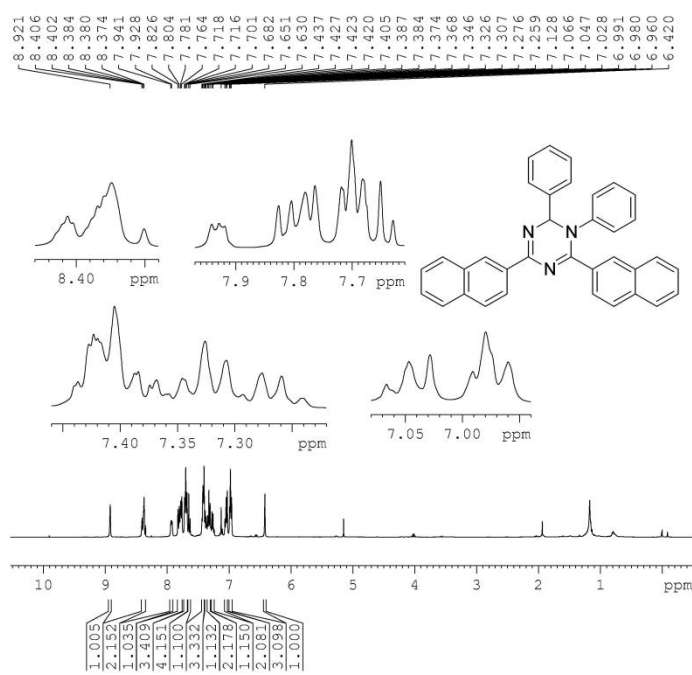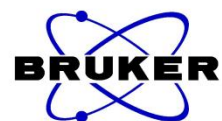

NAME 2019-04-01 tyut-lx-1  
EXPNO 10  
PROCNO 1  
Date\_ 20190402  
Time 18.30  
INSTRUM spect  
PROBHD 5 mm PABBO BB/  
PULPROG zg30  
TD 65536  
SOLVENT CDCl3  
NS 16  
DS 2  
SWH 8012.820 Hz  
FIDRES 0.122266 Hz  
AQ 4.0894966 sec  
RG 34.32  
DW 62.400 usec  
DE 6.50 usec  
TE 295.4 K  
D1 1.00000000 sec  
TD0 1

===== CHANNEL f1 =====  
SFO1 400.1324710 MHz  
NUC1 1H  
P1 9.59 usec  
SI 65536  
SF 400.1300628 MHz  
WDW EM  
SSB 0  
LB 0.30 Hz  
GB 0  
PC 1.00

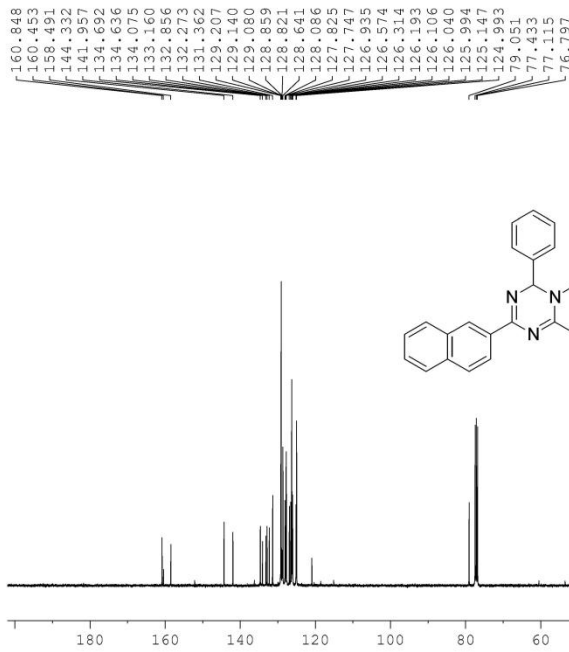

NAME 2019-04-01 tyut-lx  
EXPNO 10  
PROCNO 1  
Date\_ 20190404  
Time 0.53  
INSTRUM spect  
PROBHD 5 mm PABBO BB/  
PULPROG zgpg30  
TD 65536  
SOLVENT CDC13  
NS 1024  
DS 4  
SWH 24038.461 Hz  
FIDRES 0.366798 Hz  
AQ 1.3631988 sec  
RG 185.43  
DW 20.800 use  
DE 6.50 use  
TE 297.2 K  
D1 2.00000000 sec  
D11 0.03000000 sec  
TD0 1

===== CHANNEL f1 =====  
SF01 100.6228293 MHz  
NUC1 13C  
P1 10.27 use  
SI 32768  
SF 100.6127690 MHz  
WDW EM  
SSB 0  
LB 1.00 Hz  
GB 0  
PC ppm 1.40

7qa

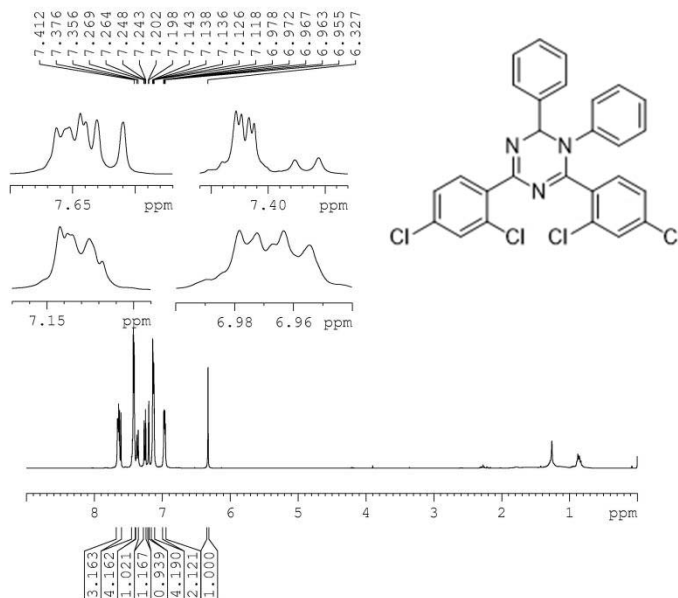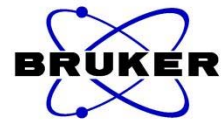

NAME 2018041201  
EXPNO 10  
PROCNO 1  
Date\_ 20180413  
Time 0.28  
INSTRUM spect  
PROBHD 5 mm PABBO BB/  
PULPROG zg30  
TD 65536  
SOLVENT CDC13  
NS 16  
DS 2  
SWH 8012.820 Hz  
FIDRES 0.122266 Hz  
AQ 4.0894966 sec  
RG 34.32  
DW 62.400 usec  
DE 6.50 usec  
TE 297.7 K  
D1 1.00000000 sec  
TD0 1

===== CHANNEL f1 =====  
SF01 400.1324710 MHz  
NUC1 1H  
P1 9.70 usec  
SI 65536  
SF 400.1300149 MHz  
WDW EM  
SSB 0  
LB 0.30 Hz  
GB 0  
PC 1.00

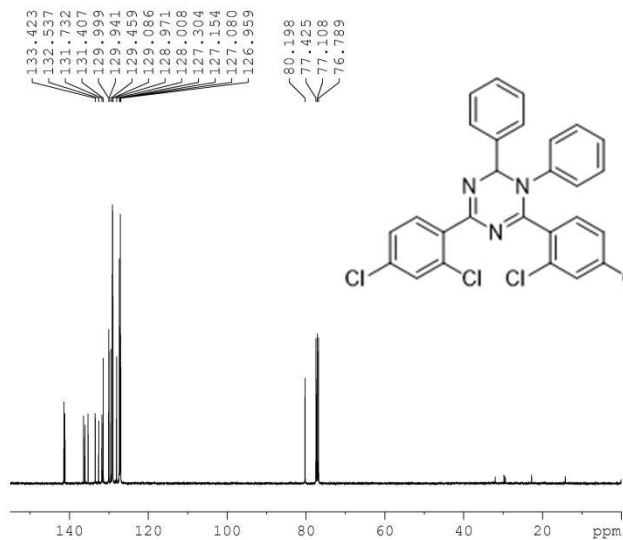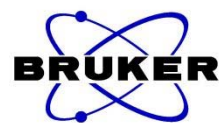

```

NAME          2018041201
EXPNO         11
PROCNO        1
Date_         20180413
Time          1.27
INSTRUM       spect
PROBHD        5 mm PABBO BB/
PULPROG       zgpg30
TD            65536
SOLVENT       CDC13
NS            1024
DS            4
SWH           24038.461 Hz
FIDRES        0.366798 Hz
AQ            1.3631988 sec
RG            185.43
DW            20.800 usec
DE            6.50 usec
TE            298.4 K
D1            2.00000000 sec
D11           0.03000000 sec
TD0           1

===== CHANNEL f1 =====
SFO1          100.6228293 MHz
NUC1          13C
P1            9.50 usec
SI            32768
SF            100.6127690 MHz
WDW           EM
SSB           0
LB            1.00 Hz
GB            0
PC            1.40
  
```
